# Supplementary material for: Global, Regional, and National Burden of Pulmonary Arterial Hypertension, 1990–2021: A Systematic Analysis for the Global Burden of Disease Study 2021
Source: Research Square preprint supplement (doi:10.21203/rs.3.rs-6836115/v1), 2025-07-31
Supplement: Supplementary file 1 [file a4fdf6b119ba484ce7254e54.docx]

**Supplemental Materials**

*Global, Regional, and National Burden of Pulmonary Arterial Hypertension, 1990–2021: A Systematic Analysis for the Global Burden of Disease Study 2021*

**List of Content**

1. **Supplemental Tables**

- **Table S1.** Global incidence, prevalence, DALYs and deaths of PAH for male sex during 1990-2021.
- **Table S2.** Global incidence, prevalence, DALYs and deaths of PAH for female sex during 1990-2021.
- **Table S3.** The temporal change of incidence from PAH by SDI quintiles in 204 countries and territories during 1990-2021.
- **Table S4.** The temporal change of prevalence from PAH by SDI quintiles in 204 countries and territories during 1990-2021.
- **Table S5.** The temporal change of DALYs from PAH by SDI quintiles in 204 countries and territories during 1990-2021.
- **Table S6.** The temporal change of deaths from PAH by SDI quintiles in 204 countries and territories during 1990-2021.

1. **Supplemental Figures**

- **Figure S1.** Relationship between SDI quintiles and the sex-specific ASR (per 100,000 persons) of the incidence, prevalence, DALYs and deaths for PAH during 1990-2021.
- **Figure S2.** The temporal change of the both-sex incidence, prevalence, DALYs and deaths for PAH by SDI quintiles across different age groups in 204 countries and territories during 1990-2021.
- **Figure S3.** The temporal change in the relative proportion of sex-specific incidence, prevalence, DALYs and deaths for PAH by SDI quintiles across different age groups in 204 countries and territories during 1990-2021.
- **Figure S4.** The temporal change of the male-sex incidence, prevalence, DALYs and deaths for PAH by SDI quintiles across different age groups in 204 countries and territories during 1990-2021.
- **Figure S5.** The temporal change of the female-sex incidence, prevalence, DALYs and deaths for PAH by SDI quintiles across different age groups in 204 countries and territories during 1990-2021.
- **Figure S6.** Age-period-cohort effects of incidence rate for PAH by SDI quintiles in 204 countries and territories during 1990-2021.
- **Figure S7.** Age-period-cohort effects of prevalence rate for PAH by SDI quintiles in 204 countries and territories during 1990-2021.
- **Figure S8.** Age-period-cohort effects of DALYs rate for PAH by SDI quintiles in 204 countries and territories during 1990-2021.
- **Figure S9.** Age-period-cohort effects of death rate for PAH by SDI quintiles in 204 countries and territories during 1990-2021.
- **Figure S10.** Sex-specific decomposition of factors contributing to incidence, prevalence, DALYs and deaths for PAH from 1990 to 2021.

**Table S1.** Global incidence, prevalence, DALYs and deaths of PAH for male sex during 1990-2021.

|  | Global | | High SDI | | High-middle SDI | | Middle SDI | | Low-middle SDI | | Low SDI | |
| --- | --- | --- | --- | --- | --- | --- | --- | --- | --- | --- | --- | --- |
|  | 1990 | 2021 | 1990 | 2021 | 1990 | 2021 | 1990 | 2021 | 1990 | 2021 | 1990 | 2021 |
| Incidence |  |  |  |  |  |  |  |  |  |  |  |  |
| *Cases* |  |  |  |  |  |  |  |  |  |  |  |  |
| Number*, n×1,000 | 10.7 (8.69, 12.80) | 19.8 (15.8, 24.10) | 1.66 (1.32, 2.04) | 2.67 (2.13, 3.33) | 2.04 (1.64, 2.47) | 3.63 (2.88, 4.54) | 3.45 (2.81, 4.16) | 6.64 (5.30, 8.16) | 2.32 (1.89, 2.78) | 4.40 (3.56, 5.32) | 1.20 (0.98, 1.43) | 2.47 (2.00, 2.94) |
| Percentage of global, % | 100 | 100 | 15.6 | 13.5 | 19.1 | 18.3 | 32.3 | 33.5 | 21.7 | 22.2 | 11.3 | 12.4 |
| Percent change of cases, 1990–2021, % | 85.6 (77.9, 93.0) | | 60.8 (52.5, 67.80) | | 77.8 (66.9, 87.90) | | 92.8 (80.1, 105.30) | | 89.5 (83.2, 95.50) | | 105.3 (101.6, 109.60) | |
| *All-age rate* |  |  |  |  |  |  |  |  |  |  |  |  |
| Rate, per 100,000 | 0.40 (0.32, 0.48) | 0.50 (0.40, 0.61) | 0.38 (0.31, 0.47) | 0.49 (0.39, 0.61) | 0.39 (0.31, 0.47) | 0.56 (0.44, 0.70) | 0.39 (0.32, 0.47) | 0.54 (0.43, 0.66) | 0.39 (0.32, 0.47) | 0.46 (0.37, 0.55) | 0.48 (0.39, 0.57) | 0.44 (0.36, 0.53) |
| Percent change of rate, 1990–2021, % | 25.9 (20.7, 30.90) | | 27.7 (21.1, 33.20) | | 44.2 (35.4, 52.40) | | 37.1 (28.1, 46.0) | | 16.0 (12.2, 19.70) | | -7.35 (-9.02, -5.41) | |
| *ASR* |  |  |  |  |  |  |  |  |  |  |  |  |
| Rate, per 100,000 | 0.47 (0.38, 0.57) | 0.48 (0.39, 0.58) | 0.36 (0.29, 0.43) | 0.35 (0.28, 0.43) | 0.42 (0.34, 0.50) | 0.45 (0.36, 0.54) | 0.51 (0.41, 0.61) | 0.51 (0.41, 0.61) | 0.54 (0.43, 0.64) | 0.52 (0.42, 0.63) | 0.69 (0.56, 0.82) | 0.63 (0.51, 0.75) |
| Percent change of rate, 1990–2021, % | 2.64 (1.98, 3.34) | | -0.61 (-1.71, 0.80) | | 7.15 (5.84, 8.67) | | 0.28 (-0.79, 1.37) | | -2.13 (-3.46, -0.92) | | -8.67 (-10.0, -7.38) | |
| EAPC | 0.03 (0.01, 0.05) | | -0.05 (-0.08, -0.03) | | 0.07 (0, 0.15) | | 0.02 (-0.03, 0.06) | | -0.18 (-0.22, -0.14) | | -0.29 (-0.34, -0.24) | |
| Prevalence |  |  |  |  |  |  |  |  |  |  |  |  |
| *Cases* |  |  |  |  |  |  |  |  |  |  |  |  |
| Number*, n×1,000 | 39.4 (32.2, 48.70) | 73.1 (58.9, 89.60) | 9.39 (7.63, 11.50) | 15.2 (12.3, 19.0) | 10.0 (8.13, 12.40) | 16.4 (13.1, 20.20) | 11.5 (9.44, 14.20) | 23.5 (18.9, 29.0) | 5.81 (4.76, 7.15) | 12.3 (10.0, 15.20) | 2.65 (2.16, 3.23) | 5.71 (4.70, 7.04) |
| Percentage of global, % | 100 | 100 | 23.8 | 20.9 | 25.4 | 22.4 | 29.2 | 32.1 | 14.7 | 16.8 | 6.71 | 7.81 |
| Percent change of cases, 1990–2021, % | 85.5 (76.3, 94.0) | | 62.4 (53.2, 71.20) | | 63.3 (52.9, 73.10) | | 103.8 (89.0, 117.70) | | 111.5 (103.8, 118.60) | | 115.9 (111.2, 120.80) | |
| *All-age rate* |  |  |  |  |  |  |  |  |  |  |  |  |
| Rate, per 100,000 | 1.47 (1.20, 1.81) | 1.85 (1.49, 2.26) | 2.17 (1.76, 2.65) | 2.79 (2.25, 3.48) | 1.89 (1.54, 2.35) | 2.51 (2.01, 3.09) | 1.31 (1.08, 1.62) | 1.90 (1.53, 2.35) | 0.98 (0.81, 1.21) | 1.27 (1.04, 1.58) | 1.05 (0.86, 1.28) | 1.02 (0.84, 1.26) |
| Percent change of rate, 1990–2021, % | 25.8 (19.6, 31.60) | | 29.0 (21.7, 36.0) | | 32.4 (24.0, 40.40) | | 44.9 (34.4, 54.80) | | 29.5 (24.8, 33.90) | | -2.58 (-4.67, -0.34) | |
| *ASR* |  |  |  |  |  |  |  |  |  |  |  |  |
| Rate, per 100,000 | 1.75 (1.42, 2.13) | 1.78 (1.44, 2.17) | 2.00 (1.64, 2.43) | 2.02 (1.65, 2.45) | 2.02 (1.64, 2.47) | 2.04 (1.65, 2.47) | 1.63 (1.32, 1.99) | 1.77 (1.43, 2.16) | 1.34 (1.09, 1.64) | 1.44 (1.16, 1.76) | 1.57 (1.26, 1.90) | 1.48 (1.20, 1.80) |
| Percent change of rate, 1990–2021, % | 1.86 (1.03, 2.67) | | 0.59 (-0.80, 2.04) | | 1.04 (-0.83, 2.94) | | 8.63 (7.34, 9.89) | | 7.94 (5.94, 9.85) | | -5.71 (-7.44, -3.90) | |
| EAPC | 0.15 (0.12, 0.17) | | 0.04 (0.01, 0.08) | | 0.26 (0.16, 0.37) | | 0.30 (0.22, 0.37) | | 0.30 (0.26, 0.34) | | -0.18 (-0.25, -0.10) | |
| DALYs |  |  |  |  |  |  |  |  |  |  |  |  |
| *Cases* |  |  |  |  |  |  |  |  |  |  |  |  |
| Number*, n×1,000 | 369.7 (316.0, 425.0) | 299.6 (246.7, 348.30) | 32.4 (30.5, 36.50) | 33.7 (31.8, 35.70) | 61.6 (54.2, 75.0) | 43.1 (36.2, 51.40) | 111.7 (95.5, 131.30) | 91.5 (65.5, 111.0) | 116.6 (84.8, 144.90) | 75.5 (59.3, 99.10) | 47.1 (33.1, 64.70) | 55.6 (36.0, 76.40) |
| Percentage of global, % | 100 | 100 | 8.77 | 11.2 | 16.7 | 14.4 | 30.2 | 30.5 | 31.5 | 25.2 | 12.7 | 18.6 |
| Percent change of cases, 1990–2021, % | -19.0 (-32.9, -0.83) | | 3.80 (-9.65, 13.60) | | -30.0 (-44.6, -11.90) | | -18.1 (-37.6, 7.29) | | -35.2 (-49.2, -5.21) | | 18.1 (-15.2, 59.80) | |
| *All-age rate* |  |  |  |  |  |  |  |  |  |  |  |  |
| Rate, per 100,000 | 13.8 (11.8, 15.80) | 7.57 (6.23, 8.80) | 7.48 (7.03, 8.41) | 6.17 (5.84, 6.54) | 11.6 (10.3, 14.20) | 6.61 (5.54, 7.87) | 12.7 (10.9, 15.0) | 7.42 (5.31, 9.00) | 19.7 (14.3, 24.50) | 7.82 (6.14, 10.30) | 18.7 (13.1, 25.60) | 9.95 (6.44, 13.70) |
| Percent change of rate, 1990–2021, % | -45.0 (-54.5, -32.70) | | -17.6 (-28.2, -9.78) | | -43.2 (-55.1, -28.50) | | -41.8 (-55.6, -23.70) | | -60.3 (-68.9, -42.0) | | -46.7 (-61.8, -27.90) | |
| *ASR* |  |  |  |  |  |  |  |  |  |  |  |  |
| Rate, per 100,000 | 14.1 (11.9, 16.40) | 8.06 (6.72, 9.36) | 7.97 (7.45, 8.97) | 4.90 (4.64, 5.19) | 13.4 (11.8, 16.50) | 6.09 (5.21, 7.17) | 15.0 (12.2, 18.70) | 8.08 (5.71, 9.76) | 16.6 (12.6, 20.90) | 8.79 (6.67, 12.20) | 15.3 (8.72, 21.80) | 10.3 (5.90, 14.90) |
| Percent change of rate, 1990–2021, % | -42.8 (-51.0, -32.50) | | -38.5 (-46.5, -32.50) | | -54.5 (-63.3, -43.60) | | -46.3 (-60.1, -28.0) | | -47.2 (-57.3, -30.30) | | -32.9 (-48.0, -15.0) | |
| EAPC | -1.54 (-1.68, -1.40) | | -1.69 (-1.85, -1.53) | | -2.43 (-2.61, -2.26) | | -1.48 (-1.75, -1.21) | | -1.77 (-1.87, -1.67) | | -1.15 (-1.23, -1.07) | |
| Deaths |  |  |  |  |  |  |  |  |  |  |  |  |
| *Cases* |  |  |  |  |  |  |  |  |  |  |  |  |
| Number*, n×1,000 | 7.33 (5.92, 8.71) | 9.58 (7.52, 11.70) | 0.93 (0.88, 1.06) | 1.51 (1.37, 1.61) | 1.48 (1.27, 1.83) | 1.82 (1.48, 2.19) | 2.40 (1.85, 3.06) | 3.56 (2.27, 4.43) | 1.78 (1.32, 2.28) | 1.71 (1.21, 2.63) | 0.73 (0.44, 1.03) | 0.98 (0.56, 1.43) |
| Percentage of global, % | 100 | 100 | 12.7 | 15.7 | 20.2 | 19.0 | 32.8 | 37.1 | 24.3 | 17.8 | 10.0 | 10.2 |
| Percent change of cases, 1990–2021, % | 30.7 (7.31, 64.60) | | 61.9 (38.8, 75.20) | | 23.2 (-6.22, 61.10) | | 48.2 (-1.08, 112.50) | | -3.94 (-23.5, 37.80) | | 33.8 (-1.98, 77.60) | |
| *All-age rate* |  |  |  |  |  |  |  |  |  |  |  |  |
| Rate, per 100,000 | 0.27 (0.22, 0.32) | 0.24 (0.19, 0.30) | 0.21 (0.20, 0.24) | 0.28 (0.25, 0.29) | 0.28 (0.24, 0.35) | 0.28 (0.23, 0.34) | 0.27 (0.21, 0.35) | 0.29 (0.18, 0.36) | 0.30 (0.22, 0.39) | 0.18 (0.13, 0.27) | 0.29 (0.17, 0.41) | 0.18 (0.10, 0.26) |
| Percent change of rate, 1990–2021, % | -11.3 (-27.2, 11.60) | | 28.6 (10.3, 39.10) | | -0.09 (-23.9, 30.70) | | 5.38 (-29.7, 51.10) | | -41.2 (-53.2, -15.60) | | -39.6 (-55.8, -19.90) | |
| *ASR* |  |  |  |  |  |  |  |  |  |  |  |  |
| Rate, per 100,000 | 0.37 (0.29, 0.46) | 0.27 (0.21, 0.33) | 0.23 (0.21, 0.26) | 0.17 (0.16, 0.18) | 0.39 (0.32, 0.48) | 0.24 (0.20, 0.29) | 0.48 (0.34, 0.65) | 0.35 (0.22, 0.43) | 0.37 (0.22, 0.59) | 0.25 (0.17, 0.43) | 0.38 (0.16, 0.67) | 0.29 (0.14, 0.47) |
| Percent change of rate, 1990–2021, % | -27.6 (-42.7, -6.33) | | -23.9 (-34.7, -18.10) | | -36.8 (-52.4, -17.10) | | -27.9 (-55.3, 11.60) | | -32.5 (-46.4, -12.80) | | -25.1 (-38.8, -3.07) | |
| EAPC | -0.73 (-0.92, -0.55) | | -0.90 (-1.05, -0.76) | | -1.25 (-1.48, -1.02) | | -0.45 (-0.79, -0.11) | | -1.07 (-1.15, -0.99) | | -0.75 (-0.84, -0.66) | |

⁎Parentheses for all GBD health estimate indicate 95% uncertainty intervals.

**Abbreviation:** ASR, age-standardized rates; DALYs, disability-adjusted life-years; EAPC, estimated annual percentage change; GBD, Global Burden of Diseases; PAH, pulmonary arterial hypertension; SDI, Socio-demographic Index.

**Table S2.** Global incidence, prevalence, DALYs and deaths of PAH for female sex during 1990-2021.

|  | Global | | High SDI | | High-middle SDI | | Middle SDI | | Low-middle SDI | | Low SDI | |
| --- | --- | --- | --- | --- | --- | --- | --- | --- | --- | --- | --- | --- |
|  | 1990 | 2021 | 1990 | 2021 | 1990 | 2021 | 1990 | 2021 | 1990 | 2021 | 1990 | 2021 |
| Incidence |  |  |  |  |  |  |  |  |  |  |  |  |
| *Cases* |  |  |  |  |  |  |  |  |  |  |  |  |
| Number*, n×1,000 | 12.6 (10.3, 15.0) | 23.4 (18.9, 28.40) | 2.02 (1.62, 2.46) | 2.94 (2.38, 3.63) | 2.43 (1.95, 2.95) | 4.10 (3.30, 5.08) | 3.82 (3.11, 4.59) | 7.53 (6.03, 9.23) | 2.80 (2.28, 3.33) | 5.58 (4.54, 6.70) | 1.55 (1.28, 1.85) | 3.25 (2.67, 3.91) |
| Percentage of global, % | 100 | 100 | 16 | 12.6 | 19.2 | 17.5 | 30.3 | 32.2 | 22.2 | 23.8 | 12.3 | 13.9 |
| Percent change of cases, 1990–2021, % | 85.6 (78.2, 93.10) | | 45.9 (39.7, 51.30) | | 69.1 (59.7, 77.70) | | 97.2 (83.7, 110.30) | | 99.6 (91.6, 107.40) | | 109.7 (105.2, 114.20) | |
| *All-age rate* |  |  |  |  |  |  |  |  |  |  |  |  |
| Rate, per 100,000 | 0.48 (0.39, 0.57) | 0.60 (0.48, 0.72) | 0.45 (0.36, 0.55) | 0.54 (0.43, 0.66) | 0.45 (0.37, 0.55) | 0.63 (0.51, 0.78) | 0.45 (0.37, 0.54) | 0.62 (0.50, 0.76) | 0.49 (0.40, 0.58) | 0.58 (0.47, 0.70) | 0.62 (0.51, 0.74) | 0.58 (0.48, 0.70) |
| Percent change of rate, 1990–2021, % | 25.0 (20.0, 30.0) | | 18.7 (13.7, 23.10) | | 38.6 (31.0, 45.80) | | 37.2 (27.9, 46.40) | | 19.1 (14.3, 23.80) | | -6.49 (-8.50, -4.48) | |
| *ASR* |  |  |  |  |  |  |  |  |  |  |  |  |
| Rate, per 100,000 | 0.53 (0.43, 0.63) | 0.55 (0.45, 0.66) | 0.38 (0.31, 0.46) | 0.38 (0.31, 0.46) | 0.44 (0.36, 0.54) | 0.47 (0.38, 0.57) | 0.56 (0.46, 0.68) | 0.56 (0.45, 0.67) | 0.66 (0.54, 0.79) | 0.65 (0.52, 0.77) | 0.88 (0.72, 1.05) | 0.80 (0.65, 0.95) |
| Percent change of rate, 1990–2021, % | 3.92 (3.25, 4.56) | | -1.07 (-2.28, 0.11) | | 5.31 (3.93, 6.77) | | -1.30 (-2.28, -0.33) | | -2.21 (-3.41, -0.91) | | -9.39 (-10.8, -7.92) | |
| EAPC | 0.06 (0.04, 0.09) | | -0.08 (-0.11, -0.05) | | 0 (-0.10, 0.09) | | -0.05 (-0.09, -0.01) | | -0.18 (-0.21, -0.15) | | -0.32 (-0.38, -0.26) | |
| Prevalence |  |  |  |  |  |  |  |  |  |  |  |  |
| *Cases* |  |  |  |  |  |  |  |  |  |  |  |  |
| Number*, n×1,000 | 66.3 (54.1, 81.50) | 118.7 (95.9, 146.30) | 17.7 (14.3, 21.80) | 26.2 (21.2, 32.30) | 17.4 (14.2, 21.40) | 26.3 (21.1, 32.70) | 17.5 (14.3, 21.50) | 36.2 (29.2, 44.70) | 9.27 (7.63, 11.40) | 20.4 (16.6, 25.30) | 4.32 (3.56, 5.34) | 9.47 (7.76, 11.70) |
| Percentage of global, % | 100 | 100 | 26.7 | 22.1 | 26.3 | 22.1 | 26.5 | 30.5 | 14.0 | 17.2 | 6.52 | 7.98 |
| Percent change of cases, 1990–2021, % | 79.1 (71.5, 86.10) | | 48.4 (42.5, 53.80) | | 50.9 (42.8, 57.90) | | 106.4 (91.5, 121.20) | | 120.4 (111.1, 128.10) | | 119.2 (114.6, 123.20) | |
| *All-age rate* |  |  |  |  |  |  |  |  |  |  |  |  |
| Rate, per 100,000 | 2.50 (2.04, 3.08) | 3.02 (2.44, 3.72) | 3.96 (3.21, 4.88) | 4.78 (3.88, 5.88) | 3.26 (2.65, 4.01) | 4.03 (3.24, 5.02) | 2.07 (1.69, 2.55) | 2.98 (2.40, 3.68) | 1.63 (1.34, 2.01) | 2.14 (1.73, 2.65) | 1.74 (1.43, 2.15) | 1.70 (1.39, 2.10) |
| Percent change of rate, 1990–2021, % | 20.6 (15.5, 25.30) | | 20.7 (15.9, 25.10) | | 23.7 (17.1, 29.50) | | 43.7 (33.3, 54.0) | | 31.5 (26.0, 36.10) | | -2.24 (-4.29, -0.45) | |
| *ASR* |  |  |  |  |  |  |  |  |  |  |  |  |
| Rate, per 100,000 | 2.81 (2.29, 3.46) | 2.75 (2.24, 3.39) | 3.28 (2.68, 4.04) | 3.26 (2.66, 4.00) | 3.14 (2.56, 3.86) | 3.02 (2.46, 3.71) | 2.52 (2.05, 3.09) | 2.65 (2.15, 3.23) | 2.21 (1.79, 2.70) | 2.33 (1.89, 2.87) | 2.59 (2.10, 3.14) | 2.40 (1.94, 2.91) |
| Percent change of rate, 1990–2021, % | -2.20 (-3.03, -1.44) | | -0.54 (-1.99, 0.77) | | -3.80 (-5.19, -2.30) | | 5.05 (3.85, 6.14) | | 5.68 (4.05, 7.41) | | -7.54 (-9.27, -5.89) | |
| EAPC | -0.02 (-0.04, -0.01) | | -0.01 (-0.04, 0.01) | | 0.06 (-0.04, 0.15) | | 0.13 (0.07, 0.20) | | 0.20 (0.18, 0.22) | | -0.27 (-0.35, -0.18) | |
| DALYs |  |  |  |  |  |  |  |  |  |  |  |  |
| *Cases* |  |  |  |  |  |  |  |  |  |  |  |  |
| Number*, n×1,000 | 317.7 (194.7, 444.0) | 342.5 (282.7, 430.60) | 49.4 (45.1, 56.0) | 59.5 (52.3, 64.60) | 66.1 (46.7, 89.30) | 56.3 (45.1, 74.20) | 99.2 (60.0, 145.20) | 105.7 (77.5, 137.30) | 78.7 (30.1, 128.80) | 80.9 (53.8, 108.30) | 24.0 (7.03, 51.50) | 39.7 (20.7, 71.70) |
| Percentage of global, % | 100 | 100 | 15.5 | 17.4 | 20.8 | 16.5 | 31.2 | 30.9 | 24.8 | 23.6 | 7.56 | 11.6 |
| Percent change of cases, 1990–2021, % | 7.78 (-25.2, 63.50) | | 20.6 (1.61, 35.20) | | -14.8 (-42.0, 36.10) | | 6.51 (-33.5, 81.80) | | 2.73 (-36.8, 99.20) | | 65.4 (1.74, 226.80) | |
| *All-age rate* |  |  |  |  |  |  |  |  |  |  |  |  |
| Rate, per 100,000 | 12.0 (7.35, 16.80) | 8.71 (7.19, 11.0) | 11.1 (10.1, 12.60) | 10.9 (9.53, 11.80) | 12.4 (8.75, 16.70) | 8.65 (6.93, 11.40) | 11.7 (7.10, 17.20) | 8.70 (6.37, 11.30) | 13.8 (5.28, 22.60) | 8.47 (5.63, 11.30) | 9.65 (2.82, 20.70) | 7.12 (3.71, 12.90) |
| Percent change of rate, 1990–2021, % | -27.4 (-49.7, 10.10) | | -1.90 (-17.3, 10.0) | | -30.1 (-52.4, 11.60) | | -25.9 (-53.7, 26.50) | | -38.7 (-62.3, 18.90) | | -26.2 (-54.6, 45.70) | |
| *ASR* |  |  |  |  |  |  |  |  |  |  |  |  |
| Rate, per 100,000 | 12.3 (7.78, 16.80) | 8.39 (6.92, 10.50) | 10.3 (9.49, 11.80) | 7.35 (6.78, 7.88) | 13.2 (9.10, 18.0) | 6.96 (5.65, 9.25) | 13.6 (8.36, 19.90) | 8.49 (6.27, 11.0) | 13.1 (5.55, 19.10) | 9.32 (6.15, 12.90) | 9.40 (3.12, 20.60) | 8.28 (4.43, 14.80) |
| Percent change of rate, 1990–2021, % | -31.9 (-50.2, -2.08) | | -28.5 (-40.3, -20.90) | | -47.1 (-65.1, -13.90) | | -37.6 (-57.4, 3.81) | | -28.8 (-50.3, 24.20) | | -11.9 (-40.5, 56.30) | |
| EAPC | -1.07 (-1.18, -0.97) | | -1.20 (-1.38, -1.01) | | -1.98 (-2.12, -1.84) | | -1.27 (-1.43, -1.10) | | -0.85 (-0.94, -0.76) | | -0.22 (-0.30, -0.14) | |
| Deaths |  |  |  |  |  |  |  |  |  |  |  |  |
| *Cases* |  |  |  |  |  |  |  |  |  |  |  |  |
| Number*, n×1,000 | 7.52 (5.06, 10.20) | 12.4 (10.0, 15.40) | 1.69 (1.48, 1.92) | 3.12 (2.53, 3.47) | 1.73 (1.32, 2.30) | 2.50 (1.94, 3.33) | 2.33 (1.46, 3.47) | 3.99 (2.62, 5.16) | 1.35 (0.56, 2.03) | 2.02 (1.32, 2.88) | 0.41 (0.13, 0.91) | 0.80 (0.42, 1.45) |
| Percentage of global, % | 100 | 100 | 22.4 | 25.0 | 23.1 | 20.1 | 31.0 | 32.1 | 17.9 | 16.2 | 5.49 | 6.44 |
| Percent change of cases, 1990–2021, % | 65.5 (27.2, 135.20) | | 84.7 (53.2, 115.0) | | 44.4 (8.96, 113.80) | | 71.5 (9.39, 186.40) | | 49.9 (-2.35, 157.0) | | 94.3 (22.3, 262.40) | |
| *All-age rate* |  |  |  |  |  |  |  |  |  |  |  |  |
| Rate, per 100,000 | 0.28 (0.19, 0.38) | 0.32 (0.25, 0.39) | 0.38 (0.33, 0.43) | 0.57 (0.46, 0.63) | 0.32 (0.25, 0.43) | 0.38 (0.30, 0.51) | 0.28 (0.17, 0.41) | 0.33 (0.22, 0.42) | 0.24 (0.10, 0.36) | 0.21 (0.14, 0.30) | 0.17 (0.05, 0.36) | 0.14 (0.07, 0.26) |
| Percent change of rate, 1990–2021, % | 11.5 (-14.3, 58.40) | | 50.3 (24.7, 75.0) | | 18.4 (-10.6, 75.30) | | 19.3 (-23.9, 99.30) | | -10.5 (-41.7, 53.40) | | -13.4 (-45.5, 61.60) | |
| *ASR* |  |  |  |  |  |  |  |  |  |  |  |  |
| Rate, per 100,000 | 0.34 (0.23, 0.45) | 0.28 (0.22, 0.34) | 0.29 (0.26, 0.33) | 0.25 (0.22, 0.28) | 0.34 (0.26, 0.45) | 0.24 (0.19, 0.32) | 0.43 (0.27, 0.66) | 0.32 (0.21, 0.41) | 0.32 (0.14, 0.54) | 0.27 (0.17, 0.41) | 0.25 (0.08, 0.62) | 0.25 (0.13, 0.44) |
| Percent change of rate, 1990–2021, % | -17.1 (-34.2, 11.90) | | -12.2 (-25.8, -0.12) | | -28.1 (-45.9, 6.96) | | -26.7 (-53.2, 18.20) | | -16.6 (-38.4, 29.40) | | -1.07 (-34.7, 70.80) | |
| EAPC | -0.43 (-0.56, -0.29) | | -0.39 (-0.58, -0.19) | | -0.94 (-1.13, -0.75) | | -0.74 (-0.93, -0.55) | | -0.35 (-0.43, -0.28) | | 0.25 (0.10, 0.40) | |

⁎Parentheses for all GBD health estimate indicate 95% uncertainty intervals.

**Abbreviation:** ASR, age-standardized rates; DALYs, disability-adjusted life-years; EAPC, estimated annual percentage change; GBD, Global Burden of Diseases; PAH, pulmonary arterial hypertension; SDI, Socio-demographic Index.

**Table S3.** The temporal change of incidence from PAH by SDI quintiles in 204 countries and territories during 1990-2021.

| Location | | | Number* in 2021 | | Percent change of cases, 1990–2021, % | | | All-age rate in 2021, per 100,000 | | Percent change of all-age rate, 1990–2021, % | | ASR in 2021, per 100,000 | | | Percent change of ASR, 1990–2021, % | | | EAPC |
| --- | --- | --- | --- | --- | --- | --- | --- | --- | --- | --- | --- | --- | --- | --- | --- | --- | --- | --- |
| High SDI |  | | |  | | |  | | | |  | | |  | | |  | |
| Luxembourg | | | 3.25 (2.61, 4.06) | | 47.66 (39.11, 56.92) | | | 0.50 (0.41, 0.63) | | -12.64 (-17.7, -7.16) | | 0.38 (0.31, 0.46) | | | -18.0 (-21.81, -13.48) | | | -0.70 (-0.89, -0.52) |
| Singapore | | | 26.44 (20.84, 33.48) | | 204.99 (175.13, 236.65) | | | 0.46 (0.36, 0.58) | | 62.27 (46.39, 79.12) | | 0.35 (0.28, 0.43) | | | 11.17 (5.38, 17.06) | | | 0.37 (0.32, 0.42) |
| Poland | | | 264.74 (213.81, 326.88) | | 52.5 (43.66, 60.46) | | | 0.69 (0.56, 0.85) | | 52.24 (43.41, 60.18) | | 0.48 (0.39, 0.58) | | | 13.11 (11.33, 14.86) | | | 0.24 (0.13, 0.35) |
| Netherlands | | | 127.82 (101.71, 158.97) | | 34.49 (24.62, 44.18) | | | 0.74 (0.59, 0.92) | | 16.61 (8.05, 25.01) | | 0.51 (0.42, 0.62) | | | -5.83 (-9.83, -0.73) | | | -0.22 (-0.23, -0.21) |
| Australia | | | 125.4 (99.96, 155.64) | | 100.41 (88.59, 112.06) | | | 0.49 (0.39, 0.60) | | 31 (23.27, 38.61) | | 0.36 (0.29, 0.44) | | | 6.70 (2.54, 11.21) | | | 0.18 (0.14, 0.21) |
| United States Virgin Islands | | | 0.6 (0.48, 0.75) | | 40.4 (22.79, 60.07) | | | 0.70 (0.55, 0.87) | | 73.35 (51.6, 97.63) | | 0.45 (0.36, 0.55) | | | 3.24 (-2.08, 8.98) | | | 0.18 (0.10, 0.27) |
| Bermuda | | | 0.41 (0.33, 0.53) | | 62.36 (45.52, 78.37) | | | 0.65 (0.52, 0.83) | | 51.73 (35.99, 66.70) | | 0.41 (0.33, 0.51) | | | 3.20 (-1.74, 7.97) | | | 0.18 (0.10, 0.26) |
| Norway | | | 32.77 (26.28, 39.95) | | 36.98 (32.59, 41.61) | | | 0.60 (0.48, 0.74) | | 7.35 (3.91, 10.98) | | 0.45 (0.36, 0.54) | | | -1.94 (-3.42, -0.45) | | | -0.15 (-0.20, -0.11) |
| New Zealand | | | 27.91 (22.44, 34.96) | | 96.62 (85.95, 109.07) | | | 0.54 (0.43, 0.68) | | 29.97 (22.92, 38.21) | | 0.42 (0.34, 0.51) | | | 7.38 (3.47, 11.68) | | | 0.20 (0.15, 0.24) |
| Sweden | | | 114.04 (92.78, 141.05) | | 32.24 (26.68, 38.31) | | | 1.10 (0.89, 1.36) | | 9.48 (4.87, 14.50) | | 0.78 (0.64, 0.94) | | | 1.94 (-1.52, 5.48) | | | 0.12 (0.07, 0.16) |
| Andorra | | | 0.50 (0.39, 0.62) | | 91.79 (75.89, 107.51) | | | 0.58 (0.46, 0.73) | | 21.81 (11.71, 31.79) | | 0.41 (0.33, 0.49) | | | -8.52 (-12.8, -4.80) | | | -0.38 (-0.42, -0.34) |
| Switzerland | | | 94.59 (77.49, 116.58) | | 41.43 (34.29, 49.08) | | | 1.06 (0.87, 1.31) | | 8.84 (3.34, 14.72) | | 0.75 (0.62, 0.90) | | | -5.15 (-8.92, -1.38) | | | -0.35 (-0.42, -0.29) |
| Estonia | | | 7.40 (5.95, 9.15) | | 24.62 (14.81, 34.53) | | | 0.56 (0.45, 0.70) | | 49.12 (37.38, 60.97) | | 0.38 (0.31, 0.47) | | | 16.79 (11.21, 22.19) | | | 0.32 (0.06, 0.57) |
| Austria | | | 49.89 (39.76, 62.05) | | 23.06 (16.08, 30.43) | | | 0.56 (0.44, 0.69) | | 6.43 (0.39, 12.80) | | 0.39 (0.31, 0.47) | | | -7.74 (-11.77, -3.02) | | | -0.38 (-0.47, -0.29) |
| Belgium | | | 69.86 (55.98, 88.19) | | 22.94 (15.75, 29.42) | | | 0.61 (0.49, 0.77) | | 6.96 (0.71, 12.60) | | 0.44 (0.35, 0.53) | | | -4.22 (-8.56, 0.19) | | | -0.18 (-0.27, -0.08) |
| Georgia | | | 19.81 (15.97, 24.74) | | -15.27 (-20.3, -10.09) | | | 0.55 (0.44, 0.69) | | 29.72 (22.03, 37.67) | | 0.41 (0.33, 0.50) | | | 4.26 (-0.50, 9.60) | | | 0.12 (0.07, 0.16) |
| Greenland | | | 0.22 (0.17, 0.28) | | 68.68 (50.22, 89.81) | | | 0.39 (0.30, 0.49) | | 67.05 (48.76, 87.97) | | 0.33 (0.26, 0.40) | | | 20.91 (14.64, 27.40) | | | 0.59 (0.42, 0.75) |
| Slovakia | | | 37.34 (29.94, 46.79) | | 90.08 (77.34, 104.05) | | | 0.69 (0.55, 0.86) | | 84.96 (72.57, 98.55) | | 0.49 (0.40, 0.59) | | | 40.03 (33.08, 47.58) | | | 0.91 (0.72, 1.10) |
| United Kingdom | | | 271.65 (216.99, 336.46) | | 25.37 (22.02, 28.26) | | | 0.40 (0.32, 0.50) | | 5.87 (3.05, 8.32) | | 0.29 (0.23, 0.35) | | | -4.45 (-5.44, -3.47) | | | -0.31 (-0.41, -0.21) |
| Kuwait | | | 18.97 (14.95, 24.01) | | 271.3 (238.4, 311.91) | | | 0.41 (0.32, 0.52) | | 37.22 (25.06, 52.23) | | 0.43 (0.35, 0.52) | | | -0.14 (-4.78, 4.88) | | | -0.08 (-0.22, 0.06) |
| Monaco | | | 0.25 (0.20, 0.32) | | 15.24 (8.74, 21.65) | | | 0.67 (0.54, 0.85) | | -7.43 (-12.65, -2.29) | | 0.41 (0.33, 0.50) | | | -11.5 (-15.29, -7.17) | | | -0.52 (-0.58, -0.46) |
| Slovenia | | | 14.17 (11.36, 17.75) | | 71.53 (57.83, 84.95) | | | 0.68 (0.55, 0.86) | | 63.56 (50.5, 76.36) | | 0.44 (0.36, 0.54) | | | 19.02 (13.46, 24.30) | | | 0.39 (0.26, 0.52) |
| Latvia | | | 9.87 (7.90, 12.29) | | -2.88 (-10.02, 4.71) | | | 0.53 (0.42, 0.66) | | 38.03 (27.89, 48.81) | | 0.35 (0.29, 0.43) | | | 8.78 (3.23, 14.21) | | | -0.04 (-0.34, 0.26) |
| San Marino | | | 0.20 (0.16, 0.25) | | 53.02 (42.94, 63.29) | | | 0.60 (0.48, 0.75) | | 11.02 (3.71, 18.47) | | 0.40 (0.32, 0.49) | | | -9.84 (-14.08, -6.11) | | | -0.42 (-0.45, -0.39) |
| Taiwan (Province of China) | | | 155.51 (123.83, 195.11) | | 97.58 (77.38, 118.86) | | | 0.66 (0.52, 0.83) | | 70.45 (53.02, 88.81) | | 0.45 (0.36, 0.55) | | | 5.50 (0.15, 10.25) | | | 0.11 (0.09, 0.13) |
| Qatar | | | 10.62 (8.11, 13.55) | | 694.1 (632.3, 755.54) | | | 0.36 (0.27, 0.46) | | 18.66 (9.42, 27.84) | | 0.45 (0.36, 0.55) | | | -0.76 (-5.53, 3.67) | | | -0.13 (-0.27, 0.01) |
| Lithuania | | | 15.09 (12.16, 18.92) | | 14.16 (5.15, 22.94) | | | 0.55 (0.45, 0.69) | | 53.75 (41.6, 65.56) | | 0.37 (0.30, 0.45) | | | 14.29 (9.01, 20.27) | | | 0.25 (-0.02, 0.52) |
| Cyprus | | | 7.04 (5.66, 8.64) | | 76.03 (65.17, 88.53) | | | 0.52 (0.42, 0.64) | | 0.87 (-5.35, 8.04) | | 0.41 (0.33, 0.49) | | | -16.76 (-20.85, -12.61) | | | -0.84 (-1.02, -0.67) |
| Iceland | | | 1.66 (1.33, 2.05) | | 55.86 (46.22, 64.84) | | | 0.47 (0.38, 0.59) | | 12.93 (5.95, 19.45) | | 0.37 (0.30, 0.44) | | | -8.70 (-12.65, -4.52) | | | -0.38 (-0.42, -0.35) |
| Saudi Arabia | | | 156.32 (122.66, 198.44) | | 182.37 (156.32, 210.35) | | | 0.41 (0.33, 0.53) | | 18.75 (7.79, 30.52) | | 0.47 (0.38, 0.58) | | | -12.6 (-17.04, -7.88) | | | -0.66 (-0.81, -0.51) |
| Japan | | | 693.81 (560.93, 866.45) | | 47.03 (33.51, 60.84) | | | 0.54 (0.44, 0.68) | | 44.88 (31.55, 58.49) | | 0.34 (0.27, 0.41) | | | 7.45 (6.07, 8.80) | | | 0.23 (0.20, 0.27) |
| Denmark | | | 33.2 (26.57, 41.91) | | -1.55 (-7.33, 4.29) | | | 0.57 (0.45, 0.72) | | -13.46 (-18.54, -8.33) | | 0.40 (0.32, 0.49) | | | -22.49 (-26.0, -18.68) | | | -0.93 (-1.03, -0.82) |
| Republic of Korea | | | 220.2 (173.45, 280.29) | | 93.95 (71.51, 118.28) | | | 0.43 (0.34, 0.54) | | 66.4 (47.15, 87.27) | | 0.30 (0.24, 0.37) | | | 2.23 (-3.06, 7.23) | | | 0.07 (0.01, 0.13) |
| Ireland | | | 11.55 (9.02, 14.58) | | 33.86 (24.1, 44.98) | | | 0.23 (0.18, 0.30) | | -2.42 (-9.54, 5.69) | | 0.18 (0.15, 0.23) | | | -19.15 (-23.41, -14.57) | | | -0.91 (-1.21, -0.62) |
| Czechia | | | 73.96 (60.56, 92.09) | | 60.1 (48.68, 72.16) | | | 0.70 (0.57, 0.87) | | 55.01 (43.95, 66.69) | | 0.46 (0.38, 0.56) | | | 19.9 (14.55, 25.78) | | | 0.40 (0.31, 0.49) |
| United Arab Emirates | | | 45.54 (34.0, 60.79) | | 689.95 (580.72, 817.50) | | | 0.47 (0.35, 0.63) | | 53.45 (32.23, 78.23) | | 0.48 (0.38, 0.58) | | | 1.21 (-4.42, 6.70) | | | -0.17 (-0.33, -0.01) |
| Canada | | | 137.56 (109.4, 170.88) | | 117.93 (100.51, 135.67) | | | 0.37 (0.29, 0.46) | | 58.51 (45.84, 71.41) | | 0.26 (0.21, 0.32) | | | 22.3 (16.55, 28.94) | | | 0.62 (0.44, 0.79) |
| Puerto Rico | | | 21.2 (16.97, 26.68) | | 43.04 (29.79, 55.01) | | | 0.64 (0.52, 0.81) | | 56.85 (42.32, 69.97) | | 0.43 (0.34, 0.52) | | | 3.85 (-0.60, 8.45) | | | 0.20 (0.12, 0.28) |
| Finland | | | 33.6 (27.14, 42.39) | | 9.07 (1.61, 17.09) | | | 0.61 (0.49, 0.77) | | -1.29 (-8.05, 5.96) | | 0.41 (0.33, 0.50) | | | -18.66 (-22.47, -14.29) | | | -0.91 (-1.12, -0.70) |
| United States of America | | | 1386.0 (1099.12, 1723.02) | | 77.26 (67.4, 86.18) | | | 0.42 (0.33, 0.52) | | 35.4 (27.87, 42.22) | | 0.31 (0.25, 0.37) | | | 11.69 (10.01, 13.41) | | | 0.32 (0.26, 0.39) |
| France | | | 440.26 (357.56, 547.35) | | 11.84 (5.33, 18.48) | | | 0.66 (0.54, 0.82) | | -2.68 (-8.35, 3.10) | | 0.47 (0.38, 0.57) | | | -17.31 (-21, -13.64) | | | -0.69 (-0.80, -0.58) |
| Germany | | | 475.91 (384.75, 597.52) | | -4.81 (-11.44, 1.37) | | | 0.56 (0.45, 0.70) | | -10.87 (-17.07, -5.08) | | 0.37 (0.30, 0.45) | | | -22.72 (-26.77, -18.65) | | | -0.76 (-0.91, -0.61) |
| High Middle SDI | |  | | | |  | | |  | | | |  | | |  | | |
| American Samoa | | | 0.28 (0.22, 0.34) | | 54.78 (39.97, 68.78) | | | 0.56 (0.44, 0.69) | | 50.87 (36.44, 64.52) | | 0.56 (0.44, 0.67) | | | 5.32 (0.86, 10.28) | | | -0.05 (-0.14, 0.04) |
| Malta | | | 2.53 (2.01, 3.17) | | 33.48 (23.27, 45.48) | | | 0.57 (0.45, 0.72) | | 11.86 (3.3, 21.92) | | 0.38 (0.31, 0.47) | | | -18.11 (-22.08, -13.93) | | | -0.61 (-0.74, -0.47) |
| Antigua and Barbuda | | | 0.48 (0.39, 0.60) | | 93.46 (78.79, 109.21) | | | 0.54 (0.43, 0.67) | | 30.34 (20.46, 40.95) | | 0.47 (0.38, 0.57) | | | 2.80 (-1.78, 7.76) | | | 0.18 (0.09, 0.26) |
| Kazakhstan | | | 83.86 (67.16, 104.48) | | 41.87 (34.75, 50.46) | | | 0.44 (0.35, 0.55) | | 22.69 (16.53, 30.12) | | 0.44 (0.36, 0.55) | | | 8.56 (3.66, 13.57) | | | 0.30 (0.12, 0.47) |
| Romania | | | 126.49 (102.2, 158.65) | | 34.07 (24.0, 43.18) | | | 0.67 (0.54, 0.84) | | 65.51 (53.08, 76.76) | | 0.45 (0.36, 0.55) | | | 22.04 (16.47, 27.78) | | | 0.48 (0.37, 0.60) |
| Portugal | | | 46.6 (37.02, 57.78) | | 31.47 (21.91, 42.74) | | | 0.44 (0.35, 0.54) | | 25.64 (16.5, 36.40) | | 0.28 (0.23, 0.34) | | | -2.42 (-7.57, 2.96) | | | -0.18 (-0.27, -0.10) |
| Bahamas | | | 2.07 (1.67, 2.52) | | 135.98 (117.18, 158.78) | | | 0.53 (0.43, 0.65) | | 56.14 (43.7, 71.23) | | 0.49 (0.40, 0.59) | | | 16.0 (10.41, 21.13) | | | 0.40 (0.22, 0.59) |
| Spain | | | 251.47 (201.6, 314.42) | | 39.09 (29.38, 47.95) | | | 0.55 (0.44, 0.69) | | 18.42 (10.16, 25.97) | | 0.37 (0.30, 0.45) | | | -4.29 (-8.62, 0.48) | | | -0.20 (-0.26, -0.13) |
| Barbados | | | 1.83 (1.46, 2.28) | | 61.09 (47.81, 77.26) | | | 0.61 (0.49, 0.76) | | 36.52 (25.26, 50.22) | | 0.44 (0.36, 0.53) | | | 3.24 (-1.95, 8.61) | | | 0.19 (0.10, 0.27) |
| Serbia | | | 57.44 (46.15, 71.66) | | 63.54 (50.56, 76.34) | | | 0.64 (0.52, 0.80) | | 76.56 (62.55, 90.38) | | 0.45 (0.36, 0.54) | | | 35.25 (29.46, 41.50) | | | 0.80 (0.58, 1.01) |
| Cook Islands | | | 0.12 (0.10, 0.15) | | 56.44 (42.91, 71.50) | | | 0.68 (0.54, 0.84) | | 66.8 (52.38, 82.86) | | 0.54 (0.43, 0.66) | | | 7.53 (2.74, 12.56) | | | 0 (-0.08, 0.09) |
| Bahrain | | | 6.30 (4.99, 7.88) | | 304.98 (266.89, 350.59) | | | 0.41 (0.33, 0.52) | | 34.09 (21.48, 49.19) | | 0.46 (0.37, 0.56) | | | -0.82 (-5.55, 4.73) | | | -0.07 (-0.20, 0.06) |
| Argentina | | | 167.81 (134.75, 206.40) | | 52.5 (45.13, 59.87) | | | 0.37 (0.30, 0.45) | | 11.01 (5.64, 16.37) | | 0.33 (0.27, 0.40) | | | -2.00 (-5.92, 2.35) | | | -0.09 (-0.13, -0.05) |
| Georgia | | | 19.81 (15.97, 24.74) | | -15.27 (-20.3, -10.09) | | | 0.55 (0.44, 0.69) | | 29.72 (22.03, 37.67) | | 0.41 (0.33, 0.50) | | | 4.26 (-0.50, 9.60) | | | 0.12 (0.07, 0.16) |
| Chile | | | 77.66 (62.31, 97.36) | | 82.39 (67.8, 97.27) | | | 0.41 (0.33, 0.52) | | 28.9 (18.59, 39.42) | | 0.35 (0.28, 0.42) | | | -4.38 (-8.85, 0.54) | | | 0.14 (0.03, 0.24) |
| Guam | | | 1.04 (0.83, 1.28) | | 87.19 (67.77, 109.02) | | | 0.65 (0.52, 0.81) | | 60.87 (44.17, 79.63) | | 0.55 (0.44, 0.67) | | | 7.89 (2.85, 13.98) | | | 0 (-0.08, 0.09) |
| Jordan | | | 48.92 (39.51, 60.21) | | 333.06 (299.6, 369.02) | | | 0.40 (0.32, 0.49) | | 31.27 (21.12, 42.16) | | 0.48 (0.39, 0.60) | | | -1.79 (-6.61, 4.37) | | | 0.07 (-0.04, 0.19) |
| Saint Kitts and Nevis | | | 0.36 (0.28, 0.45) | | 107.49 (86.71, 131.77) | | | 0.61 (0.48, 0.78) | | 46.73 (32.04, 63.91) | | 0.52 (0.42, 0.63) | | | 11.88 (6.83, 17.50) | | | 0.36 (0.27, 0.44) |
| Lebanon | | | 27.22 (21.95, 32.94) | | 130.18 (117.21, 145.22) | | | 0.49 (0.40, 0.59) | | 24.3 (17.3, 32.43) | | 0.47 (0.38, 0.56) | | | -0.71 (-6.26, 4.58) | | | -0.10 (-0.23, 0.03) |
| Russian Federation | | | 804.03 (647.18, 999.03) | | 29.37 (23.87, 34.27) | | | 0.56 (0.45, 0.69) | | 34.84 (29.11, 39.96) | | 0.42 (0.34, 0.50) | | | 11.39 (9.86, 12.95) | | | 0.10 (-0.21, 0.41) |
| Belarus | | | 50.64 (40.07, 63.10) | | 33.81 (25.45, 43.25) | | | 0.54 (0.43, 0.68) | | 49.88 (40.52, 60.46) | | 0.39 (0.32, 0.49) | | | 22.04 (16.22, 28.05) | | | 0.40 (0.12, 0.68) |
| Libya | | | 35.4 (28.33, 43.98) | | 137.2 (115.71, 162.09) | | | 0.52 (0.41, 0.64) | | 45.52 (32.33, 60.79) | | 0.54 (0.43, 0.65) | | | 3.38 (-1.91, 8.22) | | | 0.15 (-0.03, 0.33) |
| Republic of Moldova | | | 21.02 (16.86, 26.26) | | 32.67 (23.17, 41.97) | | | 0.58 (0.47, 0.73) | | 64.2 (52.44, 75.71) | | 0.43 (0.35, 0.52) | | | 20.46 (14.57, 25.93) | | | 0.32 (0.06, 0.58) |
| Mauritius | | | 11.92 (9.57, 14.77) | | 66.03 (48.17, 83.68) | | | 0.94 (0.75, 1.16) | | 43.05 (27.67, 58.26) | | 0.73 (0.59, 0.88) | | | -6.65 (-11.18, -2.00) | | | -0.26 (-0.30, -0.23) |
| Niue | | | 0.01 (0.01, 0.01) | | -2.86 (-9.59, 3.79) | | | 0.67 (0.53, 0.84) | | 34.08 (24.79, 43.26) | | 0.57 (0.46, 0.69) | | | 7.57 (2.51, 12.98) | | | 0.02 (-0.06, 0.10) |
| Malaysia | | | 148.98 (118.89, 182.76) | | 126.17 (109.13, 143.31) | | | 0.47 (0.37, 0.57) | | 25.6 (16.14, 35.12) | | 0.48 (0.38, 0.59) | | | -6.09 (-10.83, -1.70) | | | -0.28 (-0.36, -0.19) |
| Seychelles | | | 0.59 (0.47, 0.73) | | 82.36 (68.04, 97.61) | | | 0.56 (0.44, 0.69) | | 26.04 (16.14, 36.58) | | 0.50 (0.41, 0.61) | | | -3.54 (-8.10, 0.97) | | | -0.18 (-0.25, -0.11) |
| Bosnia and Herzegovina | | | 25.49 (20.38, 31.68) | | 29.43 (16.52, 41.83) | | | 0.77 (0.62, 0.96) | | 76.27 (58.69, 93.16) | | 0.52 (0.43, 0.64) | | | 16.21 (11.32, 21.69) | | | 0.44 (0.28, 0.59) |
| Oman | | | 19.83 (15.91, 24.68) | | 194.32 (170.94, 218.19) | | | 0.42 (0.34, 0.52) | | 24.17 (14.3, 34.24) | | 0.54 (0.43, 0.66) | | | 0.97 (-3.29, 5.33) | | | -0.05 (-0.19, 0.10) |
| Hungary | | | 70.02 (56.48, 88.08) | | 35.16 (26.97, 44.46) | | | 0.73 (0.59, 0.92) | | 46.39 (37.53, 56.47) | | 0.48 (0.39, 0.59) | | | 17.43 (12.88, 23.03) | | | 0.21 (0.05, 0.37) |
| Dominica | | | 0.36 (0.29, 0.45) | | 14.5 (6.06, 23.99) | | | 0.54 (0.43, 0.67) | | 23.63 (14.51, 33.87) | | 0.47 (0.38, 0.57) | | | -7.08 (-11.83, -2.14) | | | -0.17 (-0.29, -0.05) |
| Ukraine | | | 290.31 (233.7, 362.45) | | 22.81 (16.38, 31.51) | | | 0.67 (0.54, 0.84) | | 50.28 (42.41, 60.93) | | 0.47 (0.38, 0.58) | | | 24.12 (18.48, 31.03) | | | 0.53 (0.3, 0.75) |
| Northern Mariana Islands | | | 0.29 (0.23, 0.37) | | 76.97 (51.69, 105.57) | | | 0.60 (0.47, 0.76) | | 64.68 (41.15, 91.29) | | 0.54 (0.43, 0.66) | | | 8.05 (2.70, 13.38) | | | 0.02 (-0.06, 0.11) |
| Uruguay | | | 13.27 (10.64, 16.25) | | 38.47 (30.69, 47.93) | | | 0.39 (0.31, 0.48) | | 27.64 (20.47, 36.37) | | 0.31 (0.25, 0.37) | | | 11.29 (5.74, 17.27) | | | 0.59 (0.47, 0.71) |
| Brunei Darussalam | | | 1.42 (1.14, 1.79) | | 146.04 (122.39, 173.09) | | | 0.31 (0.25, 0.40) | | 41.39 (27.8, 56.94) | | 0.33 (0.26, 0.40) | | | 2.86 (-2.18, 7.93) | | | 0.01 (-0.04, 0.06) |
| Bulgaria | | | 47.87 (38.17, 60.0) | | 31.59 (21.66, 42.37) | | | 0.71 (0.56, 0.88) | | 68.29 (55.6, 82.08) | | 0.45 (0.36, 0.55) | | | 31.13 (24.86, 37.92) | | | 0.39 (0.20, 0.58) |
| China | | | 9257.24 (7349.72, 11507.74) | | 80.6 (65.72, 95.36) | | | 0.65 (0.52, 0.81) | | 49.34 (37.04, 61.55) | | 0.50 (0.40, 0.60) | | | -2.26 (-3.36, -1.15) | | | -0.12 (-0.17, -0.08) |
| Croatia | | | 30.17 (24.49, 37.14) | | 39.63 (27.48, 50.88) | | | 0.72 (0.58, 0.88) | | 61.29 (47.25, 74.28) | | 0.46 (0.37, 0.56) | | | 19.38 (14.52, 24.58) | | | 0.39 (0.28, 0.51) |
| Trinidad and Tobago | | | 7.93 (6.29, 9.87) | | 59.54 (45.98, 74.50) | | | 0.57 (0.45, 0.71) | | 37.98 (26.24, 50.91) | | 0.46 (0.37, 0.56) | | | -6.61 (-11.73, -2.22) | | | -0.21 (-0.35, -0.07) |
| Türkiye | | | 477.78 (380.63, 588.10) | | 124.83 (108.97, 142.50) | | | 0.57 (0.46, 0.70) | | 54.54 (43.64, 66.69) | | 0.52 (0.42, 0.63) | | | 8.41 (3.55, 13.52) | | | -0.11 (-0.45, 0.24) |
| North Macedonia | | | 13.76 (10.88, 17.19) | | 75.25 (62.89, 92.52) | | | 0.63 (0.50, 0.79) | | 60.43 (49.11, 76.23) | | 0.48 (0.39, 0.58) | | | 19.09 (12.8, 26.05) | | | 0.45 (0.32, 0.58) |
| Palau | | | 0.13 (0.10, 0.17) | | 90.77 (68.42, 114.95) | | | 0.72 (0.56, 0.92) | | 60.15 (41.39, 80.45) | | 0.59 (0.47, 0.71) | | | 6.57 (0.85, 12.22) | | | -0.03 (-0.11, 0.06) |
| Israel | | | 68.52 (56.27, 83.63) | | 117.64 (106.73, 129.71) | | | 0.71 (0.59, 0.87) | | 12.54 (6.9, 18.78) | | 0.64 (0.53, 0.79) | | | -1.56 (-6.37, 2.91) | | | -0.18 (-0.23, -0.14) |
| Italy | | | 388.34 (313.31, 481.82) | | 24.91 (19.02, 30.49) | | | 0.65 (0.52, 0.81) | | 18.62 (13.02, 23.92) | | 0.42 (0.34, 0.50) | | | -3.21 (-4.53, -1.76) | | | -0.28 (-0.34, -0.21) |
| Montenegro | | | 3.30 (2.65, 4.12) | | 45.86 (34.08, 57.56) | | | 0.53 (0.43, 0.67) | | 47.78 (35.84, 59.64) | | 0.40 (0.33, 0.49) | | | 12.7 (6.85, 18.46) | | | 0.15 (0.05, 0.25) |
| Greece | | | 65.2 (52.55, 80.40) | | 23.54 (14.59, 32.35) | | | 0.64 (0.52, 0.79) | | 26.14 (17.01, 35.14) | | 0.41 (0.34, 0.50) | | | 1.14 (-3.23, 6.51) | | | -0.17 (-0.40, 0.06) |
| Middle SDI |  | | |  | | |  | | | |  | | |  | | |  | |
| Ecuador | | | 89.44 (72.79, 108.15) | | 128.92 (114.16, 145.85) | | | 0.50 (0.40, 0.60) | | 26.44 (18.29, 35.79) | | 0.51 (0.42, 0.63) | | | -1.70 (-6.56, 2.53) | | | -0.07 (-0.16, 0.03) |
| Peru | | | 193.27 (157.16, 232.69) | | 128.11 (111.8, 145.10) | | | 0.53 (0.43, 0.64) | | 36.06 (26.33, 46.19) | | 0.54 (0.44, 0.66) | | | 5.69 (1.50, 10.07) | | | 0.22 (0.14, 0.31) |
| Philippines | | | 638.83 (517.78, 771.54) | | 125 (114.79, 135.71) | | | 0.56 (0.46, 0.68) | | 25.18 (19.51, 31.14) | | 0.64 (0.52, 0.77) | | | 1.49 (0.68, 2.23) | | | 0.11 (0, 0.21) |
| South Africa | | | 398.34 (323.73, 482.0) | | 75.36 (66.79, 83.88) | | | 0.7 (0.57, 0.85) | | 14.16 (8.59, 19.71) | | 0.74 (0.6, 0.88) | | | -7.22 (-8.98, -5.45) | | | -0.09 (-0.16, -0.01) |
| Algeria | | | 205.65 (165, 248.74) | | 119.02 (100.82, 136.87) | | | 0.47 (0.37, 0.56) | | 25.31 (14.9, 35.52) | | 0.50 (0.40, 0.60) | | | -6.31 (-10.47, -1.77) | | | -0.24 (-0.35, -0.12) |
| Botswana | | | 18.66 (15.2, 22.59) | | 133.05 (116.18, 151.96) | | | 0.78 (0.64, 0.94) | | 28.46 (19.16, 38.89) | | 0.90 (0.74, 1.10) | | | 0.72 (-4.17, 6.23) | | | 0.18 (0.13, 0.24) |
| Sri Lanka | | | 148.26 (117.85, 183.67) | | 75.72 (60.84, 90.89) | | | 0.67 (0.53, 0.82) | | 35.17 (23.72, 46.84) | | 0.59 (0.47, 0.71) | | | -3.31 (-7.59, 1.28) | | | -0.18 (-0.24, -0.12) |
| Thailand | | | 478.07 (378.72, 598.86) | | 89.79 (68.28, 111.51) | | | 0.72 (0.57, 0.90) | | 61.56 (43.25, 80.05) | | 0.53 (0.42, 0.63) | | | -2.20 (-6.32, 2.28) | | | -0.15 (-0.24, -0.07) |
| Viet Nam | | | 503.65 (403.39, 630.57) | | 100.54 (83.2, 118.46) | | | 0.50 (0.40, 0.63) | | 36.46 (24.66, 48.65) | | 0.48 (0.39, 0.60) | | | -2.26 (-6.46, 2.47) | | | -0.16 (-0.22, -0.09) |
| Colombia | | | 243.87 (197.54, 297.70) | | 93.05 (75.3, 110.30) | | | 0.50 (0.40, 0.61) | | 27.85 (16.09, 39.27) | | 0.46 (0.38, 0.56) | | | -9.18 (-13.71, -4.58) | | | -0.12 (-0.26, 0.01) |
| Fiji | | | 5.87 (4.67, 7.10) | | 80.36 (67.2, 96.75) | | | 0.63 (0.51, 0.77) | | 47.95 (37.16, 61.40) | | 0.68 (0.55, 0.81) | | | 13.74 (7.58, 19.42) | | | -0.03 (-0.19, 0.14) |
| Azerbaijan | | | 42.12 (33.81, 53.67) | | 56.17 (45.39, 69.17) | | | 0.40 (0.32, 0.51) | | 8.96 (1.45, 18.04) | | 0.39 (0.32, 0.47) | | | -13.94 (-17.6, -9.72) | | | -0.64 (-0.84, -0.44) |
| Turkmenistan | | | 21.49 (17.32, 26.18) | | 81.3 (68.37, 93.71) | | | 0.42 (0.34, 0.51) | | 30.02 (20.75, 38.92) | | 0.46 (0.38, 0.56) | | | 3.79 (-1.29, 8.46) | | | 0.02 (-0.07, 0.10) |
| Nauru | | | 0.05 (0.04, 0.07) | | 24.77 (18.57, 31.68) | | | 0.50 (0.41, 0.60) | | 15.49 (9.76, 21.90) | | 0.66 (0.53, 0.81) | | | 8.01 (2.51, 13.89) | | | 0.03 (-0.05, 0.10) |
| Uzbekistan | | | 144.53 (116.32, 176.79) | | 130.33 (113.42, 150.09) | | | 0.42 (0.34, 0.52) | | 41.02 (30.66, 53.12) | | 0.47 (0.38, 0.57) | | | 15.53 (9.98, 21.15) | | | 0.09 (-0.07, 0.26) |
| Iran (Islamic Republic of) | | | 392.61 (316.8, 482.48) | | 116.23 (99.23, 134.30) | | | 0.46 (0.37, 0.57) | | 44.65 (33.28, 56.74) | | 0.45 (0.37, 0.55) | | | -1.83 (-2.88, -0.74) | | | -0.13 (-0.28, 0.03) |
| Albania | | | 17.91 (14.3, 22.21) | | 59.55 (41.29, 81.75) | | | 0.67 (0.54, 0.83) | | 97.67 (75.05, 125.17) | | 0.51 (0.41, 0.62) | | | 21.65 (16.26, 27.34) | | | 0.51 (0.38, 0.65) |
| Iraq | | | 186.77 (152.15, 227.92) | | 154.0 (138.13, 171.87) | | | 0.45 (0.37, 0.55) | | 13.48 (6.39, 21.46) | | 0.57 (0.46, 0.69) | | | -7.05 (-11.18, -2.47) | | | -0.17 (-0.32, -0.03) |
| Jamaica | | | 12.41 (9.89, 15.25) | | 50.32 (40.06, 60.62) | | | 0.44 (0.35, 0.54) | | 27 (18.33, 35.70) | | 0.41 (0.33, 0.51) | | | -1.90 (-6.79, 2.60) | | | 0.04 (-0.04, 0.11) |
| Tokelau | | | 0.01 (0.01, 0.01) | | -1.29 (-7.23, 4.73) | | | 0.6 (0.48, 0.73) | | 14.81 (7.9, 21.82) | | 0.57 (0.46, 0.70) | | | -3.36 (-8.37, 2.15) | | | -0.59 (-0.76, -0.43) |
| Costa Rica | | | 23.14 (18.6, 28.60) | | 92.1 (76.36, 108.87) | | | 0.49 (0.39, 0.60) | | 23.07 (12.98, 33.81) | | 0.44 (0.36, 0.54) | | | -14.91 (-18.7, -11.11) | | | -0.36 (-0.49, -0.23) |
| Indonesia | | | 1683.59 (1350.45, 2054.21) | | 132.9 (119.47, 145.98) | | | 0.60 (0.48, 0.74) | | 54.47 (45.56, 63.14) | | 0.62 (0.50, 0.74) | | | 17.03 (15.11, 19.13) | | | 0.35 (0.30, 0.41) |
| Palestine | | | 18.59 (15.02, 22.48) | | 215.37 (196.89, 234.41) | | | 0.36 (0.29, 0.44) | | 25.7 (18.33, 33.29) | | 0.50 (0.40, 0.61) | | | 11.05 (5.55, 16.64) | | | -0.18 (-0.42, 0.06) |
| Mexico | | | 661.44 (535.67, 802.62) | | 82.0 (69.82, 95.05) | | | 0.51 (0.41, 0.62) | | 20.22 (12.17, 28.83) | | 0.50 (0.41, 0.60) | | | -14.74 (-16.14, -13.38) | | | -0.21 (-0.40, -0.01) |
| Cuba | | | 67.31 (53.87, 84.47) | | 54.45 (40.49, 68.36) | | | 0.6 (0.48, 0.75) | | 48.66 (35.23, 62.05) | | 0.43 (0.35, 0.52) | | | 4.10 (-1.01, 8.67) | | | 0.22 (0.13, 0.30) |
| Panama | | | 19.39 (15.78, 23.79) | | 93.37 (81.81, 105.07) | | | 0.45 (0.37, 0.55) | | 7.63 (1.2, 14.14) | | 0.44 (0.36, 0.54) | | | -15.51 (-19.37, -12.0) | | | -0.39 (-0.51, -0.26) |
| Dominican Republic | | | 56.11 (45.38, 68.09) | | 108.14 (94.51, 124.34) | | | 0.51 (0.41, 0.62) | | 35.15 (26.3, 45.66) | | 0.53 (0.42, 0.63) | | | 3.59 (-1.60, 8.81) | | | 0.18 (0.11, 0.25) |
| Saint Lucia | | | 1.00 (0.80, 1.25) | | 98.25 (78.65, 120.03) | | | 0.56 (0.45, 0.70) | | 52.52 (37.44, 69.28) | | 0.46 (0.37, 0.56) | | | -3.93 (-8.65, 0.89) | | | -0.14 (-0.38, 0.10) |
| Grenada | | | 0.56 (0.45, 0.70) | | 62.98 (49.94, 75.43) | | | 0.55 (0.44, 0.68) | | 38.18 (27.12, 48.74) | | 0.50 (0.40, 0.61) | | | 6.80 (1.36, 11.75) | | | 0.10 (0.05, 0.16) |
| Guyana | | | 3.76 (2.99, 4.61) | | 34.35 (24.03, 46.72) | | | 0.49 (0.39, 0.60) | | 36.98 (26.45, 49.59) | | 0.52 (0.42, 0.64) | | | 4.61 (-0.15, 9.78) | | | 0.23 (0.14, 0.33) |
| Brazil | | | 1197.97 (961.4, 1459.41) | | 103.05 (90.13, 116.60) | | | 0.54 (0.44, 0.66) | | 36.84 (28.14, 45.98) | | 0.49 (0.40, 0.59) | | | -2.05 (-3.55, -0.59) | | | -0.07 (-0.19, 0.05) |
| Paraguay | | | 28.05 (22.83, 33.72) | | 127.46 (114.8, 142.65) | | | 0.39 (0.32, 0.47) | | 28.27 (21.13, 36.84) | | 0.43 (0.35, 0.52) | | | 3.44 (-0.81, 8.59) | | | 0.32 (0.10, 0.53) |
| Maldives | | | 2.35 (1.87, 2.95) | | 182.45 (154.12, 209.52) | | | 0.45 (0.36, 0.57) | | 21.37 (9.20, 33.01) | | 0.51 (0.41, 0.62) | | | -13.46 (-17.81, -9.49) | | | -0.27 (-0.38, -0.15) |
| Saint Vincent and the Grenadines | | | 0.63 (0.50, 0.78) | | 47.87 (35.12, 62.29) | | | 0.55 (0.44, 0.69) | | 41.94 (29.7, 55.78) | | 0.48 (0.39, 0.58) | | | -4.48 (-9.18, 0.90) | | | -0.02 (-0.15, 0.12) |
| Syrian Arab Republic | | | 86.15 (68.74, 105.80) | | 73.12 (55.52, 92.25) | | | 0.61 (0.49, 0.75) | | 56.92 (40.97, 74.26) | | 0.61 (0.50, 0.74) | | | -0.43 (-4.94, 4.30) | | | -0.17 (-0.56, 0.23) |
| Suriname | | | 3.28 (2.64, 4.06) | | 101.38 (87.62, 116.34) | | | 0.57 (0.46, 0.70) | | 34.44 (25.26, 44.43) | | 0.53 (0.43, 0.64) | | | 2.87 (-2.09, 7.79) | | | 0.18 (0.09, 0.28) |
| Tunisia | | | 60.51 (47.78, 74.77) | | 93.66 (78.44, 111.27) | | | 0.51 (0.40, 0.63) | | 36.54 (25.81, 48.95) | | 0.46 (0.37, 0.56) | | | -4.75 (-9.05, -0.01) | | | -0.22 (-0.34, -0.10) |
| Tonga | | | 0.49 (0.40, 0.59) | | 33.28 (26.69, 40.79) | | | 0.46 (0.37, 0.55) | | 23.94 (17.82, 30.93) | | 0.54 (0.43, 0.65) | | | 6.30 (1.50, 11.03) | | | -0.03 (-0.10, 0.05) |
| Equatorial Guinea | | | 7.46 (6.09, 9.16) | | 234.74 (214.96, 258.44) | | | 0.49 (0.40, 0.61) | | -6.42 (-11.95, 0.21) | | 0.75 (0.60, 0.89) | | | -2.37 (-6.87, 1.77) | | | -0.04 (-0.16, 0.08) |
| Gabon | | | 10.8 (8.79, 13.06) | | 65.5 (56.54, 76.02) | | | 0.59 (0.48, 0.72) | | -10.37 (-15.22, -4.67) | | 0.75 (0.61, 0.90) | | | -14.67 (-19.02, -10.57) | | | -0.19 (-0.34, -0.05) |
| Armenia | | | 15.52 (12.46, 19.39) | | 30.2 (21.13, 41.68) | | | 0.52 (0.42, 0.65) | | 48.68 (38.33, 61.80) | | 0.42 (0.34, 0.51) | | | 6.45 (2.09, 11.50) | | | 0.20 (0.16, 0.23) |
| Low Middle SDI | |  | | | |  | | |  | | | |  | | |  | | |
| Tuvalu | | | 0.07 (0.06, 0.09) | | 56.14 (47.01, 64.11) | | | 0.59 (0.47, 0.70) | | 20.1 (13.07, 26.23) | | 0.63 (0.51, 0.77) | | | 9.06 (2.98, 14.33) | | | 0.05 (-0.03, 0.13) |
| Lesotho | | | 11.45 (9.28, 13.69) | | 29.23 (23.06, 35.75) | | | 0.61 (0.50, 0.73) | | 5.67 (0.62, 10.99) | | 0.77 (0.62, 0.92) | | | -1.95 (-6.28, 2.94) | | | -0.05 (-0.07, -0.03) |
| Mauritania | | | 17.74 (14.52, 21.46) | | 56.09 (46.98, 65.79) | | | 0.40 (0.33, 0.49) | | -27.05 (-31.31, -22.52) | | 0.56 (0.45, 0.67) | | | -29.35 (-33.33, -24.97) | | | -0.86 (-1.01, -0.71) |
| Bangladesh | | | 798.12 (644.24, 967.04) | | 142.33 (123.34, 163.24) | | | 0.48 (0.39, 0.59) | | 60.62 (48.03, 74.48) | | 0.52 (0.42, 0.62) | | | 14.99 (9.46, 20.89) | | | 0.14 (-0.15, 0.44) |
| Namibia | | | 16.7 (13.57, 19.95) | | 84.39 (74.36, 96.57) | | | 0.69 (0.56, 0.82) | | 6.49 (0.7, 13.52) | | 0.86 (0.7, 1.02) | | | -7.02 (-11, -2.23) | | | -0.05 (-0.16, 0.06) |
| Bhutan | | | 4.62 (3.77, 5.51) | | 89.28 (74.17, 105.36) | | | 0.61 (0.50, 0.73) | | 57.56 (44.98, 70.95) | | 0.66 (0.54, 0.78) | | | 11.32 (6.42, 16.38) | | | 0.40 (0.36, 0.44) |
| Nigeria | | | 1019.82 (837.32, 1241.21) | | 114.61 (107.66, 121.56) | | | 0.44 (0.36, 0.54) | | -16.41 (-19.11, -13.70) | | 0.63 (0.51, 0.77) | | | -13.47 (-15.47, -11.19) | | | -0.80 (-0.93, -0.67) |
| India | | | 7511.58 (6045.8, 9058.82) | | 100.93 (92.59, 109.53) | | | 0.53 (0.43, 0.64) | | 21.18 (16.15, 26.37) | | 0.56 (0.46, 0.68) | | | -2.81 (-3.99, -1.66) | | | -0.10 (-0.11, -0.09) |
| Comoros | | | 5.24 (4.26, 6.25) | | 128.1 (112.98, 144.22) | | | 0.70 (0.57, 0.84) | | 41.74 (32.35, 51.76) | | 0.84 (0.68, 1.01) | | | 13.25 (7.87, 19.52) | | | 0.54 (0.38, 0.70) |
| Eswatini | | | 6.78 (5.52, 8.22) | | 66.83 (56.75, 76.09) | | | 0.59 (0.48, 0.71) | | 16.45 (9.42, 22.91) | | 0.78 (0.63, 0.93) | | | -2.04 (-7.06, 2.87) | | | -0.05 (-0.07, -0.03) |
| Sao Tome and Principe | | | 0.87 (0.71, 1.07) | | 63.57 (54.39, 75.21) | | | 0.40 (0.33, 0.49) | | -8.42 (-13.56, -1.90) | | 0.53 (0.43, 0.65) | | | -15.1 (-18.96, -10.96) | | | -0.79 (-0.90, -0.67) |
| Kyrgyzstan | | | 22.74 (18.32, 27.81) | | 51.57 (42.56, 61.10) | | | 0.33 (0.27, 0.41) | | -1.41 (-7.27, 4.78) | | 0.38 (0.31, 0.47) | | | -8.31 (-12.44, -3.41) | | | -0.25 (-0.40, -0.10) |
| Zimbabwe | | | 85.51 (70, 102.95) | | 42.84 (34.57, 51.03) | | | 0.55 (0.45, 0.66) | | -5.27 (-10.76, 0.16) | | 0.77 (0.62, 0.93) | | | -13.6 (-17.65, -9.46) | | | -0.06 (-0.26, 0.13) |
| Pakistan | | | 1050.97 (847.74, 1261.48) | | 144.03 (134.56, 154.20) | | | 0.45 (0.36, 0.54) | | 15.13 (10.66, 19.92) | | 0.59 (0.48, 0.71) | | | 8.35 (5.26, 11.74) | | | -0.06 (-0.17, 0.06) |
| Mongolia | | | 13.85 (11.08, 17.14) | | 141.35 (122.46, 162.51) | | | 0.42 (0.33, 0.51) | | 56.1 (43.88, 69.79) | | 0.48 (0.38, 0.58) | | | 24.73 (19.21, 31.66) | | | 0.59 (0.46, 0.73) |
| Belize | | | 1.77 (1.45, 2.16) | | 180.25 (162.51, 202.41) | | | 0.41 (0.34, 0.50) | | 22.09 (14.36, 31.74) | | 0.48 (0.38, 0.57) | | | -2.16 (-6.32, 3.31) | | | 0.07 (-0.09, 0.23) |
| Tajikistan | | | 35.22 (28.64, 42.73) | | 118.83 (106.92, 133) | | | 0.35 (0.28, 0.42) | | 15.64 (9.35, 23.13) | | 0.44 (0.36, 0.53) | | | 4.44 (-0.13, 9.47) | | | 0.06 (0.02, 0.10) |
| Kiribati | | | 0.64 (0.52, 0.78) | | 94.3 (83.36, 106.14) | | | 0.53 (0.43, 0.64) | | 19.32 (12.61, 26.59) | | 0.66 (0.54, 0.80) | | | 7.3 (2.27, 12.79) | | | 0 (-0.09, 0.08) |
| Djibouti | | | 7.81 (6.38, 9.43) | | 256.2 (231.15, 283.41) | | | 0.62 (0.51, 0.75) | | 17.23 (8.98, 26.18) | | 0.78 (0.64, 0.94) | | | -4.69 (-9.49, 0.05) | | | 0.01 (-0.15, 0.17) |
| Democratic People's Republic of Korea | | | 158.86 (127.15, 196.08) | | 75.59 (63.75, 87.67) | | | 0.6 (0.48, 0.74) | | 37 (27.76, 46.42) | | 0.51 (0.41, 0.61) | | | 4.47 (-0.37, 10.35) | | | 0.02 (-0.02, 0.06) |
| Egypt | | | 453.65 (366.01, 559.01) | | 51.35 (41.92, 60.70) | | | 0.43 (0.35, 0.53) | | -20.72 (-25.66, -15.82) | | 0.53 (0.43, 0.65) | | | -28.51 (-32.12, -24.90) | | | -1.47 (-1.65, -1.30) |
| Cameroon | | | 160.86 (131.32, 196.70) | | 130.94 (119.46, 143.89) | | | 0.51 (0.41, 0.62) | | -24.16 (-27.93, -19.90) | | 0.73 (0.60, 0.88) | | | -24.91 (-28.36, -21.42) | | | -1.32 (-1.47, -1.16) |
| Cabo Verde | | | 2.66 (2.15, 3.27) | | 63.65 (50.07, 77.81) | | | 0.48 (0.38, 0.58) | | 3.53 (-5.06, 12.49) | | 0.51 (0.41, 0.63) | | | -16.89 (-21.24, -12.95) | | | -0.84 (-0.94, -0.73) |
| Kenya | | | 307.95 (251.27, 369.05) | | 138.79 (129.42, 148.64) | | | 0.62 (0.50, 0.74) | | 10.41 (6.07, 14.96) | | 0.84 (0.68, 1.00) | | | -4.77 (-5.77, -3.67) | | | -0.23 (-0.30, -0.15) |
| Congo | | | 30.13 (24.44, 36.73) | | 132.98 (120.08, 150.41) | | | 0.56 (0.45, 0.68) | | 3.79 (-1.96, 11.55) | | 0.72 (0.58, 0.86) | | | -7.74 (-12.02, -2.54) | | | -0.01 (-0.10, 0.08) |
| Sudan | | | 167.22 (136.96, 201.07) | | 113.58 (102.83, 125.06) | | | 0.39 (0.32, 0.46) | | -1.52 (-6.47, 3.78) | | 0.54 (0.44, 0.65) | | | -4.88 (-9.08, -0.38) | | | -0.20 (-0.32, -0.07) |
| Ghana | | | 168.73 (138.21, 205.65) | | 76.33 (66.53, 86.92) | | | 0.49 (0.40, 0.60) | | -22.91 (-27.2, -18.28) | | 0.65 (0.53, 0.79) | | | -29.66 (-32.77, -25.65) | | | -1.48 (-1.65, -1.30) |
| Cambodia | | | 89.83 (72.7, 109.76) | | 115.24 (99.65, 129.78) | | | 0.53 (0.43, 0.64) | | 29.73 (20.33, 38.50) | | 0.60 (0.48, 0.73) | | | -0.97 (-5.54, 3.53) | | | -0.08 (-0.17, 0) |
| Morocco | | | 191.43 (152.82, 234.48) | | 92.12 (78.76, 106.74) | | | 0.51 (0.41, 0.63) | | 31.04 (21.93, 41.01) | | 0.52 (0.42, 0.63) | | | -1.7 (-7.00, 3.16) | | | -0.13 (-0.26, 0.01) |
| El Salvador | | | 27.47 (22.49, 33.42) | | 17.25 (9.14, 26.61) | | | 0.43 (0.35, 0.52) | | -3.55 (-10.22, 4.15) | | 0.44 (0.35, 0.54) | | | -25.93 (-30.0, -21.04) | | | -1.07 (-1.18, -0.97) |
| Lao People's Democratic Republic | | | 42.64 (34.58, 51.05) | | 117.36 (104.28, 130.80) | | | 0.58 (0.47, 0.69) | | 22.84 (15.45, 30.44) | | 0.69 (0.56, 0.83) | | | 4.51 (-0.66, 9.19) | | | 0.05 (0, 0.09) |
| Guatemala | | | 71.68 (58.17, 87.22) | | 105.03 (91.81, 118.44) | | | 0.45 (0.37, 0.55) | | 9.02 (2.00, 16.15) | | 0.53 (0.43, 0.64) | | | -15.24 (-19.15, -10.90) | | | -0.34 (-0.49, -0.19) |
| Honduras | | | 41.58 (33.82, 50.45) | | 121.48 (108.4, 134.06) | | | 0.41 (0.33, 0.50) | | 3.18 (-2.91, 9.04) | | 0.50 (0.40, 0.61) | | | -16.41 (-20.19, -12.75) | | | -0.40 (-0.54, -0.26) |
| Nicaragua | | | 30.19 (24.62, 36.44) | | 97.31 (82, 112.91) | | | 0.45 (0.37, 0.55) | | 15.01 (6.09, 24.11) | | 0.51 (0.41, 0.62) | | | -16.08 (-20.2, -12.04) | | | -0.19 (-0.40, 0.03) |
| Venezuela (Bolivarian Republic of) | | | 148.61 (120, 182.80) | | 99.9 (81.83, 120.11) | | | 0.56 (0.45, 0.69) | | 41.18 (28.42, 55.46) | | 0.51 (0.42, 0.62) | | | -4.13 (-8.12, 0.67) | | | -0.19 (-0.42, 0.03) |
| Zambia | | | 138.75 (114.52, 168.22) | | 178.24 (161.78, 192.78) | | | 0.71 (0.59, 0.86) | | 13.16 (6.46, 19.07) | | 1.06 (0.88, 1.28) | | | 8.96 (2.82, 15.21) | | | 0.60 (0.48, 0.73) |
| Marshall Islands | | | 0.29 (0.23, 0.35) | | 81.33 (64.41, 98.67) | | | 0.51 (0.41, 0.63) | | 46.38 (32.73, 60.38) | | 0.61 (0.50, 0.74) | | | 7.44 (1.58, 12.70) | | | 0 (-0.08, 0.08) |
| Micronesia (Federated States of) | | | 0.58 (0.46, 0.71) | | 38.37 (27.34, 49.47) | | | 0.56 (0.45, 0.69) | | 39.59 (28.46, 50.79) | | 0.64 (0.52, 0.79) | | | 7.93 (2.58, 13.42) | | | 0.03 (-0.05, 0.11) |
| Samoa | | | 0.93 (0.75, 1.12) | | 62.94 (53.56, 73.10) | | | 0.43 (0.35, 0.52) | | 28.84 (21.43, 36.88) | | 0.53 (0.43, 0.65) | | | 10.91 (4.93, 16.35) | | | 0.06 (-0.09, 0.21) |
| Bolivia (Plurinational State of) | | | 64.76 (52.35, 78.03) | | 139.0 (123.38, 154.96) | | | 0.55 (0.44, 0.66) | | 29.27 (20.83, 37.91) | | 0.61 (0.49, 0.73) | | | 3.67 (-0.59, 9.57) | | | 0.16 (0.07, 0.24) |
| Myanmar | | | 321.32 (259.18, 391.42) | | 72.0 (60.52, 84.45) | | | 0.57 (0.46, 0.69) | | 23.28 (15.05, 32.21) | | 0.60 (0.49, 0.72) | | | -1.09 (-5.65, 3.99) | | | -0.12 (-0.18, -0.05) |
| Vanuatu | | | 1.37 (1.11, 1.67) | | 154.88 (141.31, 169.65) | | | 0.44 (0.35, 0.53) | | 23.97 (17.37, 31.15) | | 0.58 (0.47, 0.70) | | | 7.12 (2.91, 13.08) | | | -0.01 (-0.09, 0.07) |
| Low SDI |  | | |  | | |  | | | |  | | |  | | |  | |
| Yemen | | | 154.09 (126.36, 186.92) | | 140.31 (126.27, 153.65) | | | 0.46 (0.38, 0.56) | | -2.61 (-8.3, 2.80) | | 0.66 (0.54, 0.79) | | | -12.1 (-17.02, -7.36) | | | -0.68 (-0.82, -0.54) |
| Mali | | | 96.46 (79.32, 114.92) | | 81.26 (72.44, 91.89) | | | 0.40 (0.33, 0.48) | | -34.86 (-38.03, -31.03) | | 0.61 (0.49, 0.73) | | | -30.16 (-33.59, -26.34) | | | -1.72 (-1.98, -1.47) |
| Afghanistan | | | 115.16 (93.42, 139.37) | | 139.01 (116.58, 164.91) | | | 0.37 (0.30, 0.45) | | -23.88 (-31.03, -15.63) | | 0.60 (0.48, 0.72) | | | -1.21 (-5.75, 4.01) | | | -0.12 (-0.25, 0.01) |
| Burundi | | | 75.64 (62.1, 92.19) | | 106.18 (97.1, 116.27) | | | 0.57 (0.47, 0.70) | | -13.39 (-17.2, -9.15) | | 0.86 (0.7, 1.03) | | | -12.39 (-16.38, -8.24) | | | -0.26 (-0.44, -0.08) |
| Niger | | | 91.81 (75.8, 110.48) | | 133.54 (121.66, 145.86) | | | 0.37 (0.30, 0.44) | | -25.08 (-28.89, -21.13) | | 0.59 (0.47, 0.71) | | | -23.31 (-26.86, -19.04) | | | -1.11 (-1.21, -1.02) |
| Timor-Leste | | | 6.24 (5.05, 7.43) | | 105.37 (91.91, 119.17) | | | 0.45 (0.36, 0.53) | | 14.77 (7.25, 22.49) | | 0.57 (0.46, 0.69) | | | -3.34 (-7.65, 1.37) | | | -0.13 (-0.19, -0.07) |
| Nepal | | | 154.71 (125.48, 186.82) | | 115.33 (101.95, 127.67) | | | 0.50 (0.40, 0.60) | | 34.67 (26.31, 42.39) | | 0.57 (0.46, 0.69) | | | 8.22 (2.98, 13.32) | | | 0.21 (0.13, 0.30) |
| Senegal | | | 80.17 (65.87, 96.04) | | 35.14 (27.17, 43.54) | | | 0.51 (0.42, 0.61) | | -34.96 (-38.8, -30.92) | | 0.69 (0.56, 0.83) | | | -39.54 (-42.56, -35.97) | | | -1.31 (-1.45, -1.18) |
| Sierra Leone | | | 38.99 (31.87, 47.55) | | 44.68 (37.43, 53.38) | | | 0.44 (0.36, 0.54) | | -32.26 (-35.65, -28.19) | | 0.62 (0.51, 0.75) | | | -30.83 (-34.27, -27.41) | | | -1.64 (-1.79, -1.48) |
| Benin | | | 58.61 (48.46, 70.29) | | 87.0 (76.76, 98.24) | | | 0.43 (0.36, 0.52) | | -32.81 (-36.48, -28.77) | | 0.65 (0.53, 0.78) | | | -33.47 (-36.91, -29.07) | | | -1.32 (-1.61, -1.02) |
| Togo | | | 38.68 (31.51, 46.76) | | 86.43 (75.09, 100.13) | | | 0.46 (0.38, 0.56) | | -18.78 (-23.72, -12.81) | | 0.63 (0.51, 0.76) | | | -29.29 (-32.42, -25.65) | | | -1.41 (-1.69, -1.13) |
| Eritrea | | | 40.56 (33.1, 49.16) | | 114.73 (103.32, 127.59) | | | 0.61 (0.50, 0.75) | | 10.84 (4.96, 17.48) | | 0.87 (0.71, 1.05) | | | -1.03 (-5.49, 3.86) | | | 0.20 (0.09, 0.32) |
| South Sudan | | | 58.21 (47.21, 69.96) | | 73.78 (63.37, 85.05) | | | 0.60 (0.49, 0.72) | | 5.60 (-0.73, 12.45) | | 0.88 (0.71, 1.06) | | | 5.47 (0.5, 11.03) | | | 0.46 (0.29, 0.62) |
| Burkina Faso | | | 93.17 (76.44, 111.74) | | 50.16 (41.62, 58.05) | | | 0.41 (0.34, 0.49) | | -37.14 (-40.72, -33.84) | | 0.60 (0.49, 0.72) | | | -36.61 (-40.03, -32.98) | | | -1.99 (-2.30, -1.68) |
| Angola | | | 183.37 (150.99, 220.66) | | 223.16 (207.57, 240.91) | | | 0.56 (0.46, 0.67) | | 1.54 (-3.36, 7.11) | | 0.86 (0.70, 1.02) | | | 3.01 (-1.86, 8.41) | | | 0.14 (0.06, 0.21) |
| Ethiopia | | | 754.85 (620.38, 903.34) | | 119.88 (113.74, 126.97) | | | 0.69 (0.57, 0.83) | | 2.07 (-0.78, 5.36) | | 1.00 (0.82, 1.19) | | | -1.80 (-3.96, 0.70) | | | 0.11 (0.04, 0.18) |
| Central African Republic | | | 32.81 (26.86, 39.90) | | 99.09 (89.56, 109.28) | | | 0.60 (0.49, 0.73) | | -0.87 (-5.62, 4.20) | | 0.86 (0.70, 1.03) | | | -2.77 (-7.29, 1.93) | | | 0.02 (-0.03, 0.06) |
| Chad | | | 67.56 (54.86, 81.86) | | 111.54 (98.74, 125.32) | | | 0.38 (0.31, 0.46) | | -28.17 (-32.52, -23.50) | | 0.61 (0.49, 0.74) | | | -21.29 (-24.86, -17.24) | | | -0.96 (-1.05, -0.86) |
| Cote d'Ivoire | | | 138.78 (113, 169.23) | | 69.21 (58.36, 78.36) | | | 0.50 (0.41, 0.61) | | -25.92 (-30.67, -21.91) | | 0.71 (0.58, 0.86) | | | -32.12 (-35.83, -28.57) | | | -1.86 (-2.07, -1.65) |
| Gambia | | | 10.99 (9.04, 13.26) | | 157.35 (145.74, 170.92) | | | 0.46 (0.38, 0.55) | | 5.51 (0.75, 11.08) | | 0.68 (0.55, 0.82) | | | -0.56 (-5.07, 5.11) | | | -0.18 (-0.36, -0.01) |
| Madagascar | | | 171.67 (139.89, 206.94) | | 145.78 (133.95, 159.76) | | | 0.60 (0.49, 0.72) | | 2.42 (-2.51, 8.25) | | 0.87 (0.70, 1.03) | | | 0.81 (-4.02, 5.55) | | | 0.16 (0.04, 0.29) |
| Malawi | | | 120.32 (98.76, 146.29) | | 96.88 (87.34, 106.82) | | | 0.62 (0.51, 0.75) | | -0.73 (-5.54, 4.28) | | 0.92 (0.75, 1.10) | | | -1.75 (-6.41, 3.03) | | | 0.13 (-0.01, 0.28) |
| Guinea | | | 57.86 (47.75, 69.92) | | 52.87 (44.02, 61.39) | | | 0.43 (0.36, 0.52) | | -31.77 (-35.72, -27.97) | | 0.63 (0.51, 0.76) | | | -26.21 (-30.09, -22.62) | | | -1.12 (-1.21, -1.03) |
| Guinea-Bissau | | | 8.84 (7.21, 10.81) | | 60.09 (50.65, 69.06) | | | 0.43 (0.35, 0.52) | | -21.88 (-26.49, -17.51) | | 0.65 (0.52, 0.78) | | | -23 (-27.11, -19.43) | | | -1.00 (-1.09, -0.91) |
| Liberia | | | 28.01 (22.92, 34.37) | | 45.07 (36.81, 56.03) | | | 0.51 (0.42, 0.63) | | -34.61 (-38.34, -29.68) | | 0.73 (0.60, 0.87) | | | -34.07 (-36.83, -30.74) | | | -1.34 (-1.56, -1.12) |
| Mozambique | | | 184.43 (151.71, 222.32) | | 120.56 (110.28, 133.05) | | | 0.59 (0.49, 0.72) | | -5.17 (-9.59, 0.20) | | 0.91 (0.74, 1.08) | | | 1.60 (-3.39, 6.89) | | | 0.23 (0.13, 0.34) |
| Rwanda | | | 91.83 (75.75, 110.35) | | 97.76 (86.17, 111.92) | | | 0.69 (0.57, 0.83) | | 7.14 (0.87, 14.81) | | 0.94 (0.77, 1.12) | | | -3.66 (-8.58, 2.17) | | | 0.16 (-0.03, 0.35) |
| Uganda | | | 278.4 (230.07, 338.19) | | 78.8 (70.04, 87.77) | | | 0.64 (0.53, 0.78) | | -28.62 (-32.12, -25.04) | | 1.00 (0.82, 1.20) | | | -27.26 (-30.68, -23.57) | | | -0.49 (-0.76, -0.21) |
| Somalia | | | 115.04 (94.97, 140.65) | | 163.19 (149.07, 176.39) | | | 0.53 (0.44, 0.65) | | -3.30 (-8.49, 1.55) | | 0.88 (0.72, 1.06) | | | -0.38 (-5.14, 4.34) | | | 0.23 (0.12, 0.35) |
| Solomon Islands | | | 3.22 (2.63, 3.87) | | 147.78 (133.25, 162.27) | | | 0.47 (0.38, 0.57) | | 22.9 (15.7, 30.09) | | 0.64 (0.52, 0.78) | | | 7.73 (2.12, 12.84) | | | 0.01 (-0.07, 0.10) |
| Haiti | | | 56.18 (45.75, 68.81) | | 130.11 (118.18, 142.06) | | | 0.44 (0.36, 0.53) | | 14.14 (8.22, 20.07) | | 0.54 (0.44, 0.66) | | | 4.33 (0.10, 9.37) | | | 0.23 (0.13, 0.32) |
| Papua New Guinea | | | 46.97 (38.21, 56.93) | | 189.98 (174.26, 208.57) | | | 0.45 (0.37, 0.54) | | 13.73 (7.57, 21.03) | | 0.60 (0.49, 0.72) | | | 6.66 (1.30, 13.22) | | | -0.03 (-0.12, 0.05) |
| United Republic of Tanzania | | | 334.29 (274.71, 399.20) | | 92.26 (82.22, 102.47) | | | 0.57 (0.47, 0.68) | | -15.01 (-19.45, -10.49) | | 0.81 (0.66, 0.98) | | | -18.62 (-22.08, -14.22) | | | -0.76 (-0.86, -0.66) |
| Democratic Republic of the Congo | | | 511.28 (419.6, 619.11) | | 146.87 (132.62, 160.20) | | | 0.57 (0.47, 0.69) | | 4.62 (-1.42, 10.27) | | 0.83 (0.67, 0.98) | | | 3.64 (-1.73, 9.31) | | | 0.37 (0.12, 0.63) |

⁎Parentheses for all GBD health estimate indicate 95% uncertainty intervals.

**Abbreviation:** ASR, age-standardized rates; EAPC, estimated annual percentage change; GBD, Global Burden of Diseases; PAH, pulmonary arterial hypertension; SDI, Socio-demographic Index.

**Table S4.** The temporal change of prevalence from PAH by SDI quintiles in 204 countries and territories during 1990-2021.

| Location | | | Number* in 2021 | | Percent change of cases, 1990–2021, % | | All-age rate in 2021, per 100,000 | | | Percent change of all-age rate, 1990–2021, % | | ASR in 2021, per 100, 000 | | | Percent change of ASR, 1990–2021, % | | | EAPC |
| --- | --- | --- | --- | --- | --- | --- | --- | --- | --- | --- | --- | --- | --- | --- | --- | --- | --- | --- |
| High SDI |  | | |  | | | |  | | |  | | |  | | |  | |
| Luxembourg | | | 30.16 (24.5, 37.20) | | 115.5 (103.59, 130.80) | | 4.68 (3.80, 5.77) | | | 27.5 (20.45, 36.55) | | 3.45 (2.81, 4.21) | | | 18.14 (11.81, 25.46) | | | 0.54 (0.34, 0.74) |
| Singapore | | | 170.75 (136.87, 212.29) | | 138.37 (112.92, 162.81) | | 2.98 (2.39, 3.71) | | | 26.83 (13.28, 39.83) | | 2.24 (1.83, 2.77) | | | -10.43 (-15.75, -5.20) | | | -0.35 (-0.40, -0.30) |
| Poland | | | 1091.37 (890.4, 1342.74) | | 14.97 (8.97, 21.01) | | 2.85 (2.33, 3.51) | | | 14.77 (8.78, 20.80) | | 2.19 (1.8, 2.65) | | | -5.69 (-7.15, -4.28) | | | -0.05 (-0.13, 0.03) |
| Netherlands | | | 1192.49 (950.66, 1473.31) | | 52.65 (42.62, 63) | | 6.93 (5.52, 8.56) | | | 32.35 (23.66, 41.32) | | 4.66 (3.79, 5.76) | | | 6.73 (1.67, 12.42) | | | 0.28 (0.24, 0.32) |
| Australia | | | 991.88 (794.1, 1225.55) | | 76.66 (65.77, 88.18) | | 3.85 (3.08, 4.75) | | | 15.47 (8.36, 23.01) | | 2.87 (2.33, 3.49) | | | -4.5 (-8.61, 0.18) | | | -0.11 (-0.14, -0.08) |
| United States Virgin Islands | | | 3.1 (2.48, 3.88) | | 20.72 (6.02, 38.45) | | 3.61 (2.89, 4.51) | | | 49.05 (30.9, 70.94) | | 2.44 (1.97, 2.95) | | | -5.47 (-10.32, -0.45) | | | -0.27 (-0.38, -0.17) |
| Bermuda | | | 2.58 (2.06, 3.23) | | 37.96 (25, 50.98) | | 4.05 (3.24, 5.08) | | | 28.93 (16.82, 41.10) | | 2.73 (2.22, 3.32) | | | -5.61 (-10.34, -1.06) | | | -0.28 (-0.37, -0.18) |
| Norway | | | 303.16 (246.53, 375.46) | | 37.86 (34.04, 41.70) | | 5.6 (4.55, 6.93) | | | 8.04 (5.05, 11.05) | | 4 (3.29, 4.91) | | | -1.01 (-2.64, 0.84) | | | 0.03 (-0.01, 0.06) |
| New Zealand | | | 174.93 (141.38, 217.66) | | 61.53 (52.38, 70.87) | | 3.38 (2.73, 4.21) | | | 6.78 (0.73, 12.95) | | 2.62 (2.11, 3.21) | | | -10.13 (-13.84, -6.07) | | | -0.28 (-0.36, -0.20) |
| Sweden | | | 930.86 (755.77, 1152.74) | | 34.31 (27.59, 40.38) | | 8.97 (7.29, 11.11) | | | 11.19 (5.63, 16.22) | | 6.30 (5.19, 7.70) | | | 4.16 (0, 8.29) | | | 0.06 (0.04, 0.08) |
| Andorra | | | 4.59 (3.68, 5.71) | | 121.29 (105.82, 137.02) | | 5.37 (4.30, 6.67) | | | 40.54 (30.72, 50.53) | | 3.66 (2.98, 4.47) | | | 6.06 (1.24, 11.64) | | | 0.29 (0.25, 0.34) |
| Switzerland | | | 932.7 (761.48, 1150.89) | | 57.93 (49, 66.97) | | 10.5 (8.53, 12.9) | | | 21.53 (14.66, 28.49) | | 7.09 (5.80, 8.66) | | | 4.89 (0.32, 10.64) | | | 0.15 (0.12, 0.18) |
| Estonia | | | 56.58 (45.26, 70.27) | | -13.8 (-20.04, -7.69) | | 4.32 (3.45, 5.36) | | | 3.14 (-4.32, 10.45) | | 3.08 (2.53, 3.73) | | | -14.3 (-18.67, -10.22) | | | -0.31 (-0.57, -0.04) |
| Austria | | | 481.04 (386.86, 595.25) | | 41.22 (33.41, 49.95) | | 5.36 (4.31, 6.63) | | | 22.14 (15.37, 29.68) | | 3.57 (2.91, 4.41) | | | 4.61 (-0.62, 9.78) | | | 0.23 (0.15, 0.30) |
| Belgium | | | 719.5 (584.74, 900.01) | | 40.54 (32.91, 48.78) | | 6.27 (5.10, 7.85) | | | 22.28 (15.64, 29.45) | | 4.22 (3.48, 5.21) | | | 6.7 (1.59, 11.67) | | | 0.26 (0.15, 0.36) |
| Georgia | | | 118.37 (96.01, 145.37) | | -24.8 (-29.08, -19.63) | | 3.28 (2.66, 4.03) | | | 15.13 (8.58, 23.05) | | 2.59 (2.12, 3.14) | | | -2.64 (-8.04, 2.32) | | | -0.07 (-0.09, -0.04) |
| Greenland | | | 0.87 (0.69, 1.09) | | 15.38 (2.49, 30.34) | | 1.55 (1.22, 1.95) | | | 14.26 (1.5, 29.08) | | 1.32 (1.06, 1.62) | | | -17.52 (-22.41, -12.64) | | | -0.62 (-0.81, -0.43) |
| Slovakia | | | 185.13 (149.29, 232.06) | | 25.86 (16.97, 36.70) | | 3.41 (2.75, 4.27) | | | 22.47 (13.82, 33.02) | | 2.63 (2.15, 3.23) | | | 0.76 (-4.79, 7.57) | | | -0.01 (-0.18, 0.16) |
| United Kingdom | | | 2037.8 (1632.82, 2536.74) | | 29.91 (26.97, 32.60) | | 3.00 (2.41, 3.74) | | | 9.71 (7.23, 11.98) | | 2.13 (1.73, 2.62) | | | -0.56 (-1.54, 0.43) | | | 0.09 (0.02, 0.15) |
| Kuwait | | | 105.94 (82.68, 135.19) | | 289.94 (255.39, 329.83) | | 2.28 (1.78, 2.91) | | | 44.11 (31.34, 58.85) | | 2.17 (1.75, 2.64) | | | 5.35 (0.43, 9.88) | | | 0.25 (0.12, 0.39) |
| Monaco | | | 2.37 (1.9, 2.95) | | 44 (36.18, 53.74) | | 6.25 (5.02, 7.80) | | | 15.66 (9.38, 23.49) | | 3.66 (3.00, 4.47) | | | 8.56 (2.99, 15.11) | | | 0.4 (0.35, 0.45) |
| Slovenia | | | 73.83 (60.35, 91.37) | | 12.75 (3.78, 21.55) | | 3.57 (2.92, 4.41) | | | 7.51 (-1.04, 15.91) | | 2.58 (2.12, 3.14) | | | -11.71 (-15.4, -7.69) | | | -0.28 (-0.34, -0.23) |
| Latvia | | | 87.04 (70.65, 107.59) | | -20.69 (-26.19, -13.74) | | 4.65 (3.78, 5.75) | | | 12.71 (4.9, 22.59) | | 3.18 (2.62, 3.86) | | | -8.9 (-13.23, -3.58) | | | 0.05 (-0.31, 0.42) |
| San Marino | | | 1.99 (1.62, 2.50) | | 85.98 (75.09, 98.62) | | 6.09 (4.95, 7.63) | | | 34.93 (27.03, 44.10) | | 3.85 (3.14, 4.70) | | | 7.56 (2.38, 13.54) | | | 0.31 (0.28, 0.33) |
| Taiwan (Province of China) | | | 749.04 (598.59, 928.75) | | 65.02 (48.28, 83.57) | | 3.17 (2.53, 3.93) | | | 42.36 (27.91, 58.36) | | 2.26 (1.83, 2.77) | | | -4.62 (-10.29, -0.32) | | | -0.06 (-0.1, -0.03) |
| Qatar | | | 54.26 (42.44, 69.78) | | 717.15 (655.34, 784.91) | | 1.82 (1.43, 2.34) | | | 22.1 (12.86, 32.22) | | 1.89 (1.54, 2.30) | | | 1.65 (-3.66, 7.25) | | | 0.04 (-0.11, 0.20) |
| Lithuania | | | 115.84 (94.01, 141.92) | | -15.82 (-22.41, -9.03) | | 4.25 (3.45, 5.20) | | | 13.37 (4.49, 22.52) | | 2.94 (2.42, 3.55) | | | -11.67 (-16.27, -7.08) | | | -0.33 (-0.56, -0.09) |
| Cyprus | | | 76.42 (61.77, 92.99) | | 155.62 (140.78, 170.64) | | 5.63 (4.55, 6.85) | | | 46.48 (37.97, 55.08) | | 4.24 (3.49, 5.13) | | | 17.65 (11.06, 24.24) | | | 0.77 (0.58, 0.96) |
| Iceland | | | 14.76 (11.9, 18.41) | | 78.5 (67.09, 90.27) | | 4.21 (3.40, 5.26) | | | 29.34 (21.08, 37.87) | | 3.20 (2.61, 3.93) | | | 3.95 (-1.26, 9.26) | | | 0.19 (0.16, 0.21) |
| Saudi Arabia | | | 672.66 (535.27, 842.31) | | 276 (238.7, 311.92) | | 1.78 (1.42, 2.23) | | | 58.13 (42.44, 73.23) | | 1.91 (1.55, 2.32) | | | 17.58 (10.98, 25) | | | 0.78 (0.61, 0.95) |
| Japan | | | 6753.76 (5460.24, 8398.47) | | 31.37 (20.81, 43.20) | | 5.29 (4.28, 6.58) | | | 29.45 (19.04, 41.10) | | 3.09 (2.54, 3.79) | | | -6.95 (-8.25, -5.63) | | | -0.17 (-0.21, -0.14) |
| Denmark | | | 349.72 (282.19, 438.23) | | 69.75 (60.13, 80.84) | | 5.98 (4.82, 7.49) | | | 49.21 (40.76, 58.96) | | 4.03 (3.31, 4.97) | | | 29.21 (22.27, 36.64) | | | 0.9 (0.79, 1.02) |
| Republic of Korea | | | 2233.77 (1798.2, 2797.21) | | 93.85 (72.16, 118.25) | | 4.33 (3.49, 5.42) | | | 66.31 (47.7, 87.25) | | 2.91 (2.39, 3.58) | | | -3.47 (-8.78, 0.84) | | | -0.13 (-0.21, -0.06) |
| Ireland | | | 123.54 (99.13, 154.20) | | 100.89 (88.23, 114.66) | | 2.5 (2.01, 3.12) | | | 46.44 (37.22, 56.48) | | 1.89 (1.54, 2.34) | | | 18.25 (12.2, 25.93) | | | 0.68 (0.63, 0.73) |
| Czechia | | | 374.89 (302.68, 459.06) | | 7.19 (-0.21, 14.52) | | 3.53 (2.85, 4.32) | | | 3.78 (-3.39, 10.88) | | 2.62 (2.16, 3.16) | | | -10.9 (-15.09, -6.58) | | | -0.28 (-0.49, -0.08) |
| United Arab Emirates | | | 175.24 (133.86, 229.61) | | 615.52 (509.89, 734.01) | | 1.82 (1.39, 2.38) | | | 38.99 (18.47, 62.01) | | 1.67 (1.36, 2.04) | | | -5.14 (-10.45, 0.82) | | | 0.04 (-0.17, 0.24) |
| Canada | | | 934.87 (749.08, 1164.43) | | 41.3 (29.43, 53.61) | | 2.5 (2.00, 3.11) | | | 2.77 (-5.86, 11.73) | | 1.77 (1.43, 2.17) | | | -17.8 (-22.18, -13.11) | | | -0.64 (-0.83, -0.44) |
| Puerto Rico | | | 126.21 (101.26, 157.57) | | 25.64 (14.83, 37.58) | | 3.83 (3.07, 4.78) | | | 37.76 (25.92, 50.86) | | 2.62 (2.1, 3.18) | | | -5.15 (-9.56, -0.37) | | | -0.26 (-0.36, -0.17) |
| Finland | | | 332.31 (268.06, 415.42) | | 68.51 (58.3, 80.86) | | 6.00 (4.84, 7.50) | | | 52.5 (43.26, 63.67) | | 3.79 (3.10, 4.61) | | | 19.8 (13.65, 27.09) | | | 0.84 (0.61, 1.06) |
| United States of America | | | 7689.56 (6171.59, 9562.46) | | 44.5 (37.64, 50.70) | | 2.31 (1.86, 2.87) | | | 10.38 (5.14, 15.11) | | 1.72 (1.39, 2.12) | | | -6.59 (-8.19, -5.13) | | | -0.2 (-0.29, -0.10) |
| France | | | 4013.54 (3243.84, 4928.16) | | 72.3 (61.58, 82.88) | | 6.05 (4.89, 7.42) | | | 49.93 (40.6, 59.14) | | 4.07 (3.34, 4.98) | | | 22.74 (16.79, 29.55) | | | 0.72 (0.61, 0.82) |
| Germany | | | 4886.47 (3953.61, 6093.82) | | 61.76 (50.92, 72.34) | | 5.72 (4.63, 7.14) | | | 51.47 (41.32, 61.38) | | 3.59 (2.93, 4.36) | | | 24.68 (17.7, 31.40) | | | 0.41 (0.29, 0.53) |
| High Middle SDI | |  | | | |  | | |  | | | |  | | |  | | |
| American Samoa | | | 1.01 (0.82, 1.23) | | 33.21 (19.81, 45.49) | | 2.03 (1.64, 2.48) | | | 29.85 (16.79, 41.82) | | 2.01 (1.62, 2.46) | | | -5.56 (-10.62, -0.89) | | | 0.11 (0.01, 0.22) |
| Malta | | | 25.99 (20.96, 32.14) | | 101.51 (86.11, 118.74) | | 5.88 (4.74, 7.27) | | | 68.87 (55.96, 83.31) | | 3.74 (3.06, 4.59) | | | 19.6 (12.49, 27.12) | | | 0.53 (0.37, 0.69) |
| Antigua and Barbuda | | | 2.85 (2.3, 3.55) | | 75.09 (62, 90.08) | | 3.19 (2.58, 3.97) | | | 17.96 (9.14, 28.06) | | 2.74 (2.24, 3.39) | | | -6.42 (-10.81, -1.60) | | | -0.32 (-0.42, -0.21) |
| Kazakhstan | | | 441.96 (360.54, 545.11) | | 20.09 (12.65, 26.74) | | 2.33 (1.9, 2.88) | | | 3.86 (-2.58, 9.61) | | 2.33 (1.90, 2.83) | | | -7.19 (-11.94, -2.51) | | | -0.31 (-0.52, -0.10) |
| Romania | | | 480.97 (388.96, 592.33) | | -14.36 (-21.36, -7.77) | | 2.54 (2.05, 3.13) | | | 5.73 (-2.92, 13.85) | | 1.89 (1.54, 2.31) | | | -13.76 (-18.6, -9.67) | | | -0.34 (-0.41, -0.26) |
| Portugal | | | 364.75 (292.9, 453.34) | | 38.43 (27.64, 48.94) | | 3.44 (2.76, 4.27) | | | 32.28 (21.97, 42.33) | | 2.13 (1.74, 2.62) | | | 0.72 (-4.98, 6.55) | | | -0.09 (-0.15, -0.03) |
| Bahamas | | | 9.03 (7.26, 11.22) | | 67.69 (53.31, 82.48) | | 2.33 (1.87, 2.89) | | | 10.95 (1.44, 20.74) | | 2.14 (1.73, 2.62) | | | -17.21 (-21.82, -12.56) | | | -0.52 (-0.74, -0.31) |
| Spain | | | 1970.83 (1573.23, 2448.12) | | 52.07 (41.12, 63.69) | | 4.33 (3.45, 5.37) | | | 29.48 (20.16, 39.37) | | 2.82 (2.27, 3.46) | | | 3.52 (-1.87, 9.44) | | | 0.05 (-0.03, 0.13) |
| Barbados | | | 9.97 (8.02, 12.30) | | 42.92 (31.82, 54.51) | | 3.33 (2.68, 4.11) | | | 21.12 (11.71, 30.94) | | 2.47 (1.99, 3.03) | | | -5.86 (-10.22, -0.63) | | | -0.3 (-0.4, -0.20) |
| Serbia | | | 242.11 (192.72, 299.97) | | 16.56 (9.02, 25.66) | | 2.71 (2.16, 3.36) | | | 25.84 (17.7, 35.67) | | 2.09 (1.70, 2.55) | | | 6.15 (1.48, 11.87) | | | 0.39 (0.3, 0.49) |
| Cook Islands | | | 0.46 (0.38, 0.57) | | 27.31 (13.74, 40.69) | | 2.61 (2.11, 3.23) | | | 35.75 (21.27, 50) | | 2.17 (1.77, 2.68) | | | -5.45 (-10.82, -0.73) | | | 0.12 (0.01, 0.22) |
| Bahrain | | | 28.25 (22.52, 35.84) | | 289.09 (249.66, 338.90) | | 1.85 (1.47, 2.34) | | | 28.83 (15.77, 45.32) | | 1.83 (1.48, 2.25) | | | -1.33 (-6.35, 4.12) | | | -0.02 (-0.17, 0.13) |
| Argentina | | | 1370.63 (1107.84, 1702.27) | | 68.49 (60.03, 77.80) | | 3.01 (2.44, 3.74) | | | 22.65 (16.49, 29.43) | | 2.65 (2.14, 3.29) | | | 5.95 (0.94, 10.98) | | | 0.24 (0.21, 0.27) |
| Georgia | | | 118.37 (96.01, 145.37) | | -24.8 (-29.08, -19.63) | | 3.28 (2.66, 4.03) | | | 15.13 (8.58, 23.05) | | 2.59 (2.12, 3.14) | | | -2.64 (-8.04, 2.32) | | | -0.07 (-0.09, -0.04) |
| Chile | | | 758.02 (610.68, 930.79) | | 99.76 (85.08, 115.12) | | 4.03 (3.25, 4.95) | | | 41.18 (30.81, 52.04) | | 3.30 (2.69, 4.03) | | | 1.41 (-3.65, 6.64) | | | -0.2 (-0.29, -0.10) |
| Guam | | | 3.78 (3.06, 4.67) | | 52.58 (36.08, 70.99) | | 2.38 (1.92, 2.93) | | | 31.12 (16.94, 46.94) | | 2.06 (1.69, 2.51) | | | -6.36 (-11.53, -0.23) | | | 0.07 (-0.03, 0.16) |
| Jordan | | | 242.77 (197.06, 299.34) | | 354.41 (321.15, 392.58) | | 1.97 (1.6, 2.43) | | | 37.74 (27.66, 49.31) | | 2.25 (1.82, 2.78) | | | 1.98 (-3, 7.52) | | | -0.11 (-0.25, 0.03) |
| Saint Kitts and Nevis | | | 1.36 (1.09, 1.71) | | 55.62 (39.89, 72.94) | | 2.33 (1.87, 2.91) | | | 10.05 (-1.07, 22.30) | | 1.97 (1.60, 2.41) | | | -15.7 (-20.5, -9.85) | | | -0.54 (-0.64, -0.44) |
| Lebanon | | | 122.98 (99.21, 153.01) | | 133 (120.44, 147.60) | | 2.22 (1.79, 2.76) | | | 25.83 (19.05, 33.71) | | 2.08 (1.68, 2.58) | | | 1.17 (-3.67, 6.39) | | | 0.12 (-0.02, 0.26) |
| Russian Federation | | | 5452.53 (4431.73, 6731.29) | | 1.57 (-2.46, 5.34) | | 3.76 (3.06, 4.65) | | | 5.87 (1.67, 9.80) | | 2.90 (2.38, 3.51) | | | -9.6 (-10.86, -8.40) | | | -0.04 (-0.39, 0.31) |
| Belarus | | | 384.53 (310.58, 480.08) | | -11.29 (-17.27, -5.35) | | 4.12 (3.33, 5.15) | | | -0.64 (-7.33, 6.01) | | 3.10 (2.53, 3.78) | | | -15.59 (-20.52, -11.16) | | | -0.29 (-0.59, 0.02) |
| Libya | | | 144.08 (115.28, 180.97) | | 125.34 (104.78, 147.25) | | 2.10 (1.68, 2.63) | | | 38.25 (25.63, 51.68) | | 2.11 (1.70, 2.58) | | | -4.72 (-9.78, -0.23) | | | -0.24 (-0.45, -0.04) |
| Republic of Moldova | | | 138.83 (112.19, 171.58) | | -2.25 (-8.92, 4.47) | | 3.86 (3.12, 4.77) | | | 20.98 (12.72, 29.29) | | 2.93 (2.39, 3.56) | | | -7.6 (-11.72, -3.54) | | | 0.14 (-0.25, 0.53) |
| Mauritius | | | 51.58 (41.59, 63.54) | | 63.55 (46.19, 84.10) | | 4.05 (3.27, 5.00) | | | 40.92 (25.96, 58.62) | | 3.24 (2.65, 3.96) | | | -0.85 (-6.4, 5.35) | | | 0.11 (-0.01, 0.23) |
| Niue | | | 0.04 (0.03, 0.05) | | -19.25 (-25.53, -12.36) | | 2.28 (1.84, 2.82) | | | 11.46 (2.8, 20.96) | | 1.99 (1.62, 2.44) | | | -9.34 (-14.53, -3.90) | | | -0.02 (-0.14, 0.09) |
| Malaysia | | | 594.05 (479.09, 737.17) | | 130.75 (113.07, 148.17) | | 1.87 (1.51, 2.32) | | | 28.15 (18.33, 37.82) | | 1.85 (1.50, 2.26) | | | -0.59 (-5.76, 5.06) | | | 0.07 (0.02, 0.12) |
| Seychelles | | | 2.17 (1.75, 2.67) | | 88.21 (72.52, 106.09) | | 2.05 (1.66, 2.53) | | | 30.08 (19.24, 42.44) | | 1.85 (1.5, 2.25) | | | 2.84 (-2.33, 8.85) | | | 0.18 (0.1, 0.27) |
| Bosnia and Herzegovina | | | 121.28 (98.28, 149.93) | | -13.35 (-21.23, -4.60) | | 3.67 (2.98, 4.54) | | | 18.02 (7.28, 29.93) | | 2.80 (2.31, 3.41) | | | -9.31 (-13.99, -4.51) | | | -0.32 (-0.46, -0.17) |
| Oman | | | 83.3 (67.15, 107.54) | | 206.37 (183.6, 229.24) | | 1.77 (1.43, 2.29) | | | 29.25 (19.64, 38.90) | | 2.02 (1.64, 2.47) | | | 1.14 (-4.22, 6.68) | | | 0.21 (0.03, 0.39) |
| Hungary | | | 396.99 (318.54, 483.98) | | -2.88 (-9.14, 4.30) | | 4.14 (3.32, 5.04) | | | 5.19 (-1.58, 12.97) | | 3.02 (2.48, 3.65) | | | -9.07 (-13.73, -4.35) | | | 0 (-0.14, 0.14) |
| Dominica | | | 1.73 (1.38, 2.13) | | 29.19 (19.16, 39.99) | | 2.58 (2.06, 3.17) | | | 39.49 (28.66, 51.15) | | 2.23 (1.80, 2.72) | | | 5.05 (-0.62, 11.08) | | | 0.05 (-0.1, 0.21) |
| Ukraine | | | 1450.87 (1164.47, 1795.18) | | -24.52 (-29.01, -19.47) | | 3.37 (2.70, 4.17) | | | -7.64 (-13.13, -1.46) | | 2.52 (2.06, 3.07) | | | -18.95 (-22.81, -14.54) | | | -0.49 (-0.74, -0.24) |
| Northern Mariana Islands | | | 1.13 (0.91, 1.40) | | 37.56 (18.56, 59.44) | | 2.33 (1.87, 2.88) | | | 28.01 (10.32, 48.36) | | 2.11 (1.72, 2.56) | | | -5.81 (-11.13, -0.84) | | | 0.08 (-0.01, 0.17) |
| Uruguay | | | 98.56 (79.51, 121.81) | | 12.11 (4.92, 19.39) | | 2.89 (2.33, 3.58) | | | 3.35 (-3.28, 10.05) | | 2.25 (1.83, 2.76) | | | -10.09 (-15.07, -4.84) | | | -0.57 (-0.67, -0.46) |
| Brunei Darussalam | | | 8.97 (7.16, 11.19) | | 134.76 (113.22, 157.84) | | 1.99 (1.59, 2.48) | | | 34.91 (22.53, 48.17) | | 2.02 (1.62, 2.49) | | | -3 (-7.6, 1.28) | | | 0.05 (-0.01, 0.10) |
| Bulgaria | | | 181 (146.16, 222.21) | | -29.08 (-34.63, -22.27) | | 2.67 (2.15, 3.27) | | | -9.3 (-16.4, -0.59) | | 1.93 (1.57, 2.36) | | | -21.92 (-26.5, -17.17) | | | -0.29 (-0.48, -0.10) |
| China | | | 41135.19 (32838.91, 51357.25) | | 86.74 (69.26, 103.07) | | 2.89 (2.31, 3.61) | | | 54.41 (39.96, 67.91) | | 2.24 (1.81, 2.75) | | | 8.11 (6.73, 9.67) | | | 0.39 (0.35, 0.44) |
| Croatia | | | 149.73 (120.88, 183.40) | | -8.13 (-14.66, -0.01) | | 3.56 (2.87, 4.36) | | | 6.12 (-1.42, 15.50) | | 2.60 (2.13, 3.13) | | | -11.39 (-15.44, -7.01) | | | -0.24 (-0.31, -0.17) |
| Trinidad and Tobago | | | 38.76 (31.14, 48.24) | | 77.48 (61.71, 94.90) | | 2.78 (2.23, 3.46) | | | 53.49 (39.85, 68.55) | | 2.27 (1.83, 2.79) | | | 7.33 (1.53, 13.80) | | | 0.18 (0, 0.35) |
| Türkiye | | | 2423.45 (1941.94, 3032.63) | | 182.5 (161.1, 205.25) | | 2.9 (2.32, 3.63) | | | 94.18 (79.47, 109.82) | | 2.60 (2.10, 3.23) | | | 39.83 (31.71, 47.89) | | | 1.23 (0.83, 1.63) |
| North Macedonia | | | 63.35 (50.96, 78.29) | | 21.63 (12.63, 32.22) | | 2.91 (2.34, 3.60) | | | 11.34 (3.1, 21.04) | | 2.33 (1.90, 2.84) | | | -10.67 (-15.32, -6.06) | | | -0.27 (-0.36, -0.18) |
| Palau | | | 0.41 (0.32, 0.50) | | 52 (32.37, 71.32) | | 2.24 (1.79, 2.79) | | | 27.6 (11.12, 43.82) | | 1.84 (1.50, 2.24) | | | -10.2 (-14.99, -4.85) | | | -0.03 (-0.15, 0.10) |
| Israel | | | 464.21 (377.68, 563.75) | | 113.98 (103.07, 126.40) | | 4.84 (3.94, 5.88) | | | 10.65 (5.01, 17.07) | | 4.39 (3.61, 5.32) | | | -2.43 (-7.11, 2.55) | | | -0.02 (-0.08, 0.03) |
| Italy | | | 3881.79 (3154.34, 4755.03) | | 34.24 (28.67, 39.97) | | 6.49 (5.27, 7.95) | | | 27.48 (22.19, 32.92) | | 3.95 (3.22, 4.82) | | | 1.92 (0.35, 3.40) | | | 0.24 (0.17, 0.32) |
| Montenegro | | | 18.27 (14.67, 22.52) | | 14.17 (6.1, 23.63) | | 2.96 (2.37, 3.64) | | | 15.67 (7.5, 25.26) | | 2.39 (1.96, 2.90) | | | -4.86 (-9.29, -0.13) | | | 0.01 (-0.05, 0.08) |
| Greece | | | 459.14 (370.04, 569.60) | | 13.79 (5.36, 22.33) | | 4.51 (3.64, 5.60) | | | 16.19 (7.58, 24.91) | | 2.88 (2.36, 3.53) | | | -6.24 (-11.06, -1.37) | | | -0.22 (-0.44, -0.01) |
| Middle SDI |  | | |  | | | |  | | |  | | |  | | |  | |
| Ecuador | | | 518.61 (422.26, 640.18) | | 143.52 (126.33, 160.13) | | 2.87 (2.34, 3.54) | | | 34.5 (25.01, 43.68) | | 2.97 (2.41, 3.63) | | | 1.79 (-3.48, 7.05) | | | 0.05 (-0.06, 0.15) |
| Peru | | | 992.62 (804.11, 1223.54) | | 106.51 (91.91, 121.98) | | 2.74 (2.22, 3.37) | | | 23.17 (14.47, 32.41) | | 2.77 (2.23, 3.39) | | | -7.56 (-11.69, -3.08) | | | -0.34 (-0.44, -0.23) |
| Philippines | | | 2238.48 (1836.21, 2775.80) | | 113.79 (102.97, 123.02) | | 1.98 (1.62, 2.45) | | | 18.95 (12.92, 24.08) | | 2.20 (1.79, 2.68) | | | -4.74 (-5.79, -3.68) | | | -0.27 (-0.47, -0.06) |
| South Africa | | | 1266.71 (1021.29, 1543.69) | | 109.23 (97.06, 119.51) | | 2.23 (1.80, 2.72) | | | 36.21 (28.29, 42.91) | | 2.38 (1.93, 2.88) | | | 8.63 (6.05, 11.63) | | | 0.19 (0.13, 0.24) |
| Algeria | | | 782.08 (631.38, 978.98) | | 154.17 (130.49, 177.77) | | 1.77 (1.43, 2.21) | | | 45.43 (31.88, 58.92) | | 1.86 (1.49, 2.31) | | | 7.62 (1.83, 14.35) | | | 0.25 (0.12, 0.38) |
| Botswana | | | 39.16 (31.75, 48.58) | | 99.6 (82.69, 116.87) | | 1.64 (1.33, 2.03) | | | 10.02 (0.7, 19.54) | | 1.95 (1.57, 2.40) | | | -14.04 (-19.41, -8.02) | | | -0.43 (-0.49, -0.38) |
| Sri Lanka | | | 645.83 (513.8, 798.34) | | 85.94 (69.02, 103.80) | | 2.90 (2.31, 3.58) | | | 43.03 (30.01, 56.77) | | 2.54 (2.05, 3.09) | | | 6.11 (0.15, 12.01) | | | 0.29 (0.2, 0.38) |
| Thailand | | | 1891.89 (1513.44, 2391.99) | | 105.27 (81.09, 131.20) | | 2.84 (2.27, 3.59) | | | 74.74 (54.15, 96.81) | | 2.08 (1.68, 2.55) | | | 7.84 (3.04, 13.66) | | | 0.31 (0.25, 0.37) |
| Viet Nam | | | 1989.52 (1591.34, 2490.73) | | 106.7 (87.46, 125.94) | | 1.98 (1.59, 2.48) | | | 40.65 (27.56, 53.74) | | 1.87 (1.51, 2.30) | | | 1.57 (-3.69, 7.19) | | | 0.16 (0.09, 0.23) |
| Colombia | | | 1816.56 (1473.8, 2240.82) | | 148.47 (128.04, 169.49) | | 3.70 (3.00, 4.57) | | | 64.56 (51.02, 78.47) | | 3.38 (2.76, 4.15) | | | 14.16 (7.98, 20.21) | | | 0.15 (-0.02, 0.33) |
| Fiji | | | 17.15 (13.94, 21.06) | | 33.48 (22.58, 46.47) | | 1.86 (1.51, 2.28) | | | 9.5 (0.55, 20.16) | | 1.94 (1.58, 2.37) | | | -13.2 (-18.74, -7.78) | | | 0.16 (-0.07, 0.38) |
| Azerbaijan | | | 298.88 (242.3, 370.23) | | 116.48 (101.32, 133.67) | | 2.85 (2.31, 3.53) | | | 51.05 (40.47, 63.04) | | 2.67 (2.19, 3.25) | | | 21 (14.43, 27.70) | | | 0.73 (0.51, 0.95) |
| Turkmenistan | | | 103.17 (84.35, 128.23) | | 69.16 (55.95, 80.52) | | 2.00 (1.64, 2.49) | | | 21.31 (11.84, 29.46) | | 2.15 (1.76, 2.64) | | | -3.57 (-9.45, 1.21) | | | 0.01 (-0.09, 0.11) |
| Nauru | | | 0.14 (0.11, 0.17) | | 10.7 (4.02, 17.27) | | 1.27 (1.04, 1.57) | | | 2.47 (-3.71, 8.55) | | 1.63 (1.32, 1.98) | | | -4.73 (-10.46, 0.97) | | | 0.15 (0.05, 0.24) |
| Uzbekistan | | | 680.4 (554.72, 842.77) | | 75.52 (61.43, 91.30) | | 1.99 (1.62, 2.46) | | | 7.46 (-1.16, 17.12) | | 2.10 (1.72, 2.55) | | | -15.24 (-20.35, -9.29) | | | -0.08 (-0.25, 0.08) |
| Iran (Islamic Republic of) | | | 1903.63 (1532.67, 2361.21) | | 135.79 (116.65, 154.95) | | 2.23 (1.80, 2.77) | | | 57.73 (44.93, 70.55) | | 2.13 (1.73, 2.62) | | | 2.87 (1.3, 4.61) | | | 0.17 (0, 0.35) |
| Albania | | | 90.51 (73.14, 111.48) | | 7 (-5.71, 20.80) | | 3.39 (2.74, 4.18) | | | 32.56 (16.82, 49.66) | | 2.68 (2.20, 3.28) | | | -13.28 (-18.1, -8.66) | | | -0.35 (-0.44, -0.25) |
| Iraq | | | 640.34 (524.62, 798.22) | | 203.74 (181.37, 228.03) | | 1.55 (1.27, 1.94) | | | 35.7 (25.7, 46.55) | | 1.87 (1.52, 2.31) | | | 9.43 (3.23, 15.89) | | | 0.17 (-0.01, 0.35) |
| Jamaica | | | 79.31 (64.21, 98.16) | | 52.03 (42.24, 62.96) | | 2.83 (2.29, 3.51) | | | 28.44 (20.17, 37.68) | | 2.62 (2.12, 3.23) | | | -0.43 (-5.11, 5) | | | -0.11 (-0.19, -0.02) |
| Tokelau | | | 0.03 (0.02, 0.03) | | 5.7 (-1.12, 12.80) | | 2.03 (1.64, 2.47) | | | 22.95 (15.01, 31.20) | | 1.95 (1.58, 2.39) | | | 4.47 (-1.71, 10.88) | | | 0.78 (0.55, 1.01) |
| Costa Rica | | | 189.26 (152.9, 233.07) | | 175.19 (152.1, 199.09) | | 3.99 (3.22, 4.91) | | | 76.3 (61.5, 91.61) | | 3.58 (2.90, 4.38) | | | 23.28 (16.58, 30.19) | | | 0.45 (0.29, 0.61) |
| Indonesia | | | 4923.16 (3970.54, 6153.64) | | 131.04 (116.55, 145.55) | | 1.77 (1.42, 2.21) | | | 53.23 (43.62, 62.86) | | 1.73 (1.41, 2.12) | | | 16.69 (14.41, 19.10) | | | 0.47 (0.21, 0.72) |
| Palestine | | | 75.48 (61.28, 92.91) | | 167.4 (150.25, 189.06) | | 1.47 (1.19, 1.81) | | | 6.58 (-0.26, 15.21) | | 1.87 (1.52, 2.28) | | | -13.24 (-18.36, -7.44) | | | 0.19 (-0.11, 0.49) |
| Mexico | | | 4287.35 (3482.55, 5273.35) | | 162.47 (142.7, 181.53) | | 3.32 (2.69, 4.08) | | | 73.37 (60.31, 85.96) | | 3.22 (2.63, 3.95) | | | 23.62 (21.16, 26.92) | | | 0.27 (0.03, 0.51) |
| Cuba | | | 388.59 (309.06, 482.27) | | 34.52 (22.45, 46.15) | | 3.45 (2.74, 4.28) | | | 29.48 (17.86, 40.67) | | 2.55 (2.06, 3.14) | | | -4.97 (-9.79, -0.16) | | | -0.26 (-0.35, -0.16) |
| Panama | | | 152.15 (122.66, 187.72) | | 183.43 (165, 203.70) | | 3.54 (2.86, 4.37) | | | 57.76 (47.5, 69.04) | | 3.47 (2.80, 4.27) | | | 23.28 (17.14, 30.24) | | | 0.46 (0.3, 0.62) |
| Dominican Republic | | | 286.21 (230.7, 352.66) | | 90.58 (76.52, 104.59) | | 2.60 (2.09, 3.20) | | | 23.74 (14.62, 32.84) | | 2.66 (2.14, 3.25) | | | -6.91 (-11.78, -2.46) | | | -0.33 (-0.42, -0.24) |
| Saint Lucia | | | 5.07 (4.05, 6.32) | | 105.39 (84.46, 126.99) | | 2.86 (2.28, 3.56) | | | 58.01 (41.92, 74.63) | | 2.33 (1.88, 2.87) | | | 2.24 (-2.76, 8.08) | | | 0.06 (-0.21, 0.33) |
| Grenada | | | 2.33 (1.87, 2.88) | | 37.55 (26.8, 50.07) | | 2.27 (1.82, 2.81) | | | 16.62 (7.5, 27.24) | | 2.06 (1.67, 2.53) | | | -10.86 (-16.36, -5.86) | | | -0.22 (-0.3, -0.14) |
| Guyana | | | 14.3 (11.6, 17.58) | | 20.32 (10.7, 29.98) | | 1.87 (1.52, 2.30) | | | 22.67 (12.86, 32.52) | | 1.97 (1.60, 2.39) | | | -5.37 (-10.52, -0.36) | | | -0.3 (-0.4, -0.19) |
| Brazil | | | 6077.92 (4890.48, 7486.91) | | 116.23 (100.48, 131.01) | | 2.76 (2.22, 3.40) | | | 45.73 (35.11, 55.69) | | 2.48 (2.01, 3.04) | | | 5.81 (4.1, 7.70) | | | 0.13 (-0.04, 0.29) |
| Paraguay | | | 160.68 (130.29, 196.44) | | 115.72 (102.77, 130.68) | | 2.24 (1.82, 2.74) | | | 21.65 (14.35, 30.08) | | 2.40 (1.95, 2.93) | | | -4.35 (-9.82, 1.34) | | | -0.4 (-0.65, -0.14) |
| Maldives | | | 10.72 (8.48, 13.60) | | 319.84 (275.82, 363.56) | | 2.07 (1.64, 2.63) | | | 80.42 (61.5, 99.21) | | 2.06 (1.67, 2.55) | | | 18.24 (11.19, 25.21) | | | 0.29 (0.12, 0.45) |
| Saint Vincent and the Grenadines | | | 2.83 (2.27, 3.49) | | 54.96 (40.06, 71.12) | | 2.49 (1.99, 3.06) | | | 48.75 (34.45, 64.26) | | 2.15 (1.74, 2.66) | | | 2.28 (-3.14, 8.36) | | | -0.1 (-0.26, 0.07) |
| Syrian Arab Republic | | | 279.91 (227.04, 345.64) | | 78.89 (58.34, 101.30) | | 2.00 (1.62, 2.46) | | | 62.15 (43.52, 82.46) | | 1.96 (1.60, 2.41) | | | 4.87 (-0.78, 10.88) | | | 0.34 (-0.15, 0.83) |
| Suriname | | | 15.69 (12.7, 19.35) | | 84.66 (68.16, 99.09) | | 2.71 (2.19, 3.34) | | | 23.28 (12.27, 32.92) | | 2.51 (2.05, 3.10) | | | -6.09 (-11.26, -1.12) | | | -0.31 (-0.41, -0.21) |
| Tunisia | | | 306.39 (246, 379.70) | | 116.48 (97.98, 135.57) | | 2.59 (2.08, 3.21) | | | 52.62 (39.58, 66.08) | | 2.32 (1.88, 2.86) | | | 7.89 (2.41, 14.44) | | | 0.32 (0.18, 0.45) |
| Tonga | | | 1.93 (1.58, 2.36) | | 16.35 (9.85, 24.44) | | 1.82 (1.48, 2.22) | | | 8.2 (2.16, 15.73) | | 2.13 (1.72, 2.61) | | | -6.67 (-11.29, -1.31) | | | 0.08 (-0.03, 0.18) |
| Equatorial Guinea | | | 18.23 (14.67, 22.99) | | 253.82 (229.03, 279.47) | | 1.21 (0.97, 1.52) | | | -1.08 (-8.01, 6.09) | | 1.86 (1.49, 2.30) | | | 0.01 (-5.6, 6.10) | | | -0.06 (-0.24, 0.12) |
| Gabon | | | 29.75 (23.93, 36.78) | | 43.77 (34.09, 53.96) | | 1.64 (1.32, 2.03) | | | -22.14 (-27.38, -16.62) | | 2.05 (1.66, 2.51) | | | -27.72 (-32.19, -23.08) | | | -0.76 (-0.93, -0.59) |
| Armenia | | | 100.74 (80.55, 124.84) | | 11.77 (3.71, 21.20) | | 3.36 (2.69, 4.17) | | | 27.64 (18.44, 38.42) | | 2.77 (2.27, 3.40) | | | -3.46 (-7.73, 1.56) | | | -0.08 (-0.1, -0.07) |
| Low Middle SDI | |  | | | |  | | |  | | | |  | | |  | | |
| Tuvalu | | | 0.2 (0.16, 0.24) | | 25.55 (17.66, 33.53) | | 1.58 (1.28, 1.96) | | | -3.44 (-9.5, 2.70) | | 1.69 (1.36, 2.09) | | | -13.53 (-18.55, -8.27) | | | -0.15 (-0.26, -0.04) |
| Lesotho | | | 24.74 (20.33, 30.43) | | 33.97 (24.55, 43.04) | | 1.32 (1.08, 1.62) | | | 9.54 (1.84, 16.95) | | 1.70 (1.38, 2.07) | | | 0.55 (-5.95, 7.25) | | | 0.02 (0, 0.05) |
| Mauritania | | | 75.35 (61.16, 93.19) | | 203.36 (178.59, 229.73) | | 1.71 (1.39, 2.12) | | | 41.78 (30.2, 54.10) | | 2.45 (1.98, 3.02) | | | 38.91 (28.07, 50.91) | | | 0.78 (0.54, 1.02) |
| Bangladesh | | | 2842.4 (2308.79, 3540.67) | | 209.58 (184.55, 238.35) | | 1.73 (1.4, 2.15) | | | 105.19 (88.6, 124.26) | | 1.81 (1.46, 2.23) | | | 42.06 (32.89, 51.61) | | | 1.24 (1.09, 1.39) |
| Namibia | | | 51.01 (42.08, 61.85) | | 93.95 (81.28, 107.94) | | 2.1 (1.73, 2.54) | | | 12.01 (4.69, 20.09) | | 2.67 (2.18, 3.22) | | | -2.82 (-8.29, 3.96) | | | -0.28 (-0.37, -0.18) |
| Bhutan | | | 11.94 (9.76, 14.79) | | 52.13 (37.99, 65.46) | | 1.58 (1.29, 1.95) | | | 26.63 (14.86, 37.73) | | 1.64 (1.33, 2.02) | | | -13.56 (-18.73, -8.15) | | | -0.54 (-0.6, -0.48) |
| Nigeria | | | 5343.65 (4375.67, 6636.13) | | 260.42 (243.91, 278.48) | | 2.31 (1.89, 2.87) | | | 40.39 (33.96, 47.42) | | 3.66 (2.95, 4.50) | | | 52.93 (47.76, 60.40) | | | 1.74 (1.54, 1.94) |
| India | | | 23741.72 (19176.4, 29559.14) | | 124.15 (114.41, 133.53) | | 1.68 (1.36, 2.09) | | | 35.18 (29.31, 40.84) | | 1.74 (1.41, 2.12) | | | 6.94 (5.43, 8.68) | | | 0.2 (0.19, 0.22) |
| Comoros | | | 10.83 (8.71, 13.29) | | 79.53 (64.91, 95.96) | | 1.45 (1.17, 1.79) | | | 11.57 (2.48, 21.77) | | 1.70 (1.37, 2.09) | | | -14.99 (-21.13, -8.56) | | | -0.75 (-0.97, -0.52) |
| Eswatini | | | 14.69 (11.77, 18) | | 75.11 (62.56, 89.68) | | 1.27 (1.02, 1.56) | | | 22.23 (13.48, 32.40) | | 1.74 (1.38, 2.12) | | | 1.26 (-4.86, 8.52) | | | 0.07 (0.04, 0.10) |
| Sao Tome and Principe | | | 4.03 (3.29, 5.04) | | 142.31 (126.04, 159.93) | | 1.86 (1.52, 2.33) | | | 35.67 (26.55, 45.53) | | 2.44 (1.98, 3.01) | | | 21.35 (14.36, 28.81) | | | 0.94 (0.79, 1.08) |
| Kyrgyzstan | | | 163.55 (133.53, 201.01) | | 86.07 (74.84, 97.55) | | 2.38 (1.95, 2.93) | | | 21.02 (13.72, 28.49) | | 2.72 (2.22, 3.33) | | | 12.58 (6.76, 18.89) | | | 0.32 (0.16, 0.48) |
| Zimbabwe | | | 199.92 (162.05, 250.11) | | 70.06 (57, 81.64) | | 1.28 (1.04, 1.60) | | | 12.79 (4.12, 20.46) | | 1.85 (1.5, 2.29) | | | 3.7 (-3.21, 10.72) | | | -0.42 (-0.67, -0.18) |
| Pakistan | | | 2519.72 (2035.52, 3133.01) | | 114.57 (104.13, 124.89) | | 1.07 (0.86, 1.33) | | | 1.23 (-3.7, 6.10) | | 1.38 (1.11, 1.70) | | | -8.37 (-12.21, -4.40) | | | 0.13 (-0.02, 0.29) |
| Mongolia | | | 62.91 (50.86, 78.33) | | 122.29 (104.5, 143.76) | | 1.89 (1.52, 2.35) | | | 43.77 (32.27, 57.65) | | 2.09 (1.69, 2.55) | | | 16 (10.62, 21.85) | | | 0.34 (0.19, 0.49) |
| Belize | | | 8.27 (6.72, 10.17) | | 201.12 (181.14, 223.46) | | 1.93 (1.57, 2.37) | | | 31.18 (22.47, 40.91) | | 2.18 (1.76, 2.65) | | | 3 (-2.37, 8.85) | | | -0.1 (-0.29, 0.09) |
| Tajikistan | | | 191.88 (155.22, 238.51) | | 112.57 (99.62, 126.37) | | 1.89 (1.53, 2.35) | | | 12.33 (5.49, 19.62) | | 2.27 (1.84, 2.77) | | | -3.22 (-7.92, 1.44) | | | -0.08 (-0.1, -0.05) |
| Kiribati | | | 1.65 (1.33, 2.06) | | 67.81 (56.88, 79.25) | | 1.36 (1.1, 1.70) | | | 3.05 (-3.66, 10.08) | | 1.66 (1.33, 2.04) | | | -8.26 (-13.65, -2.79) | | | 0.04 (-0.07, 0.16) |
| Djibouti | | | 19.42 (15.72, 23.93) | | 299.1 (263.14, 328.24) | | 1.54 (1.25, 1.90) | | | 31.35 (19.51, 40.94) | | 1.92 (1.57, 2.35) | | | 5.13 (-1.53, 12.31) | | | -0.08 (-0.29, 0.13) |
| Democratic People's Republic of Korea | | | 601.81 (478.99, 752.27) | | 56.04 (44.64, 68.88) | | 2.28 (1.81, 2.85) | | | 21.74 (12.85, 31.76) | | 1.93 (1.56, 2.37) | | | -4.9 (-10.77, 0.50) | | | -0.07 (-0.13, -0.01) |
| Egypt | | | 1547.37 (1262.19, 1927.18) | | 38.2 (28.72, 47.53) | | 1.46 (1.19, 1.82) | | | -27.6 (-32.57, -22.72) | | 1.74 (1.41, 2.14) | | | -35.8 (-39.6, -31.76) | | | -1.76 (-2.03, -1.50) |
| Cameroon | | | 491.6 (402.64, 606.62) | | 200.28 (181.91, 222.60) | | 1.55 (1.27, 1.91) | | | -1.38 (-7.42, 5.95) | | 2.35 (1.9, 2.89) | | | -2.99 (-9.06, 3.55) | | | 0.34 (0.02, 0.66) |
| Cabo Verde | | | 13.69 (11.06, 16.91) | | 146.77 (128.29, 171.44) | | 2.45 (1.98, 3.02) | | | 56.11 (44.43, 71.72) | | 2.61 (2.11, 3.17) | | | 20.48 (12.97, 28.87) | | | 0.9 (0.76, 1.04) |
| Kenya | | | 926.71 (761.54, 1138.65) | | 165.13 (154.5, 175.20) | | 1.85 (1.52, 2.27) | | | 22.59 (17.67, 27.24) | | 2.59 (2.10, 3.15) | | | 3.96 (2.4, 5.69) | | | -0.13 (-0.29, 0.03) |
| Congo | | | 87.63 (71.23, 108.07) | | 114.9 (102.7, 130.67) | | 1.63 (1.32, 2.00) | | | -4.27 (-9.71, 2.76) | | 2.13 (1.72, 2.62) | | | -16.99 (-21.12, -12.33) | | | -0.42 (-0.63, -0.21) |
| Sudan | | | 531.02 (438.55, 667.25) | | 124.08 (110.71, 138.30) | | 1.22 (1.01, 1.54) | | | 3.33 (-2.84, 9.88) | | 1.68 (1.37, 2.05) | | | -3.47 (-8.67, 2.89) | | | 0.03 (-0.15, 0.20) |
| Ghana | | | 807.11 (666.42, 999.67) | | 137.51 (122.23, 153.99) | | 2.36 (1.95, 2.92) | | | 3.83 (-2.85, 11.04) | | 3.26 (2.65, 4) | | | -6.26 (-11.62, 0.06) | | | 0.28 (-0.06, 0.62) |
| Cambodia | | | 245.08 (196.8, 301.03) | | 123.38 (105.43, 138.98) | | 1.44 (1.15, 1.77) | | | 34.64 (23.82, 44.04) | | 1.60 (1.29, 1.94) | | | -0.01 (-5.73, 5.70) | | | 0.07 (-0.04, 0.18) |
| Morocco | | | 677.59 (545.76, 846.27) | | 96.94 (80.47, 113.06) | | 1.82 (1.47, 2.28) | | | 34.33 (23.09, 45.32) | | 1.81 (1.46, 2.22) | | | 1.61 (-3.96, 8.10) | | | 0.15 (-0.01, 0.30) |
| El Salvador | | | 226.84 (185.61, 281.37) | | 136.66 (118.2, 156.56) | | 3.52 (2.88, 4.36) | | | 94.67 (79.48, 111.03) | | 3.62 (2.95, 4.48) | | | 46.73 (36.46, 57.29) | | | 1.33 (1.19, 1.47) |
| Lao People's Democratic Republic | | | 126.49 (102.63, 157.26) | | 150.42 (133.53, 167.48) | | 1.71 (1.39, 2.13) | | | 41.53 (31.98, 51.17) | | 2.02 (1.64, 2.44) | | | 16.4 (9.53, 23.65) | | | 0.55 (0.35, 0.74) |
| Guatemala | | | 393.03 (319.44, 485.64) | | 218.56 (195.7, 241.98) | | 2.49 (2.03, 3.08) | | | 69.4 (57.24, 81.85) | | 2.94 (2.37, 3.61) | | | 27.87 (20.25, 36.91) | | | 0.55 (0.37, 0.72) |
| Honduras | | | 245.83 (201.41, 303.82) | | 236.19 (213.42, 257.95) | | 2.43 (1.99, 3.01) | | | 56.63 (46.02, 66.76) | | 2.96 (2.4, 3.65) | | | 25.92 (18.12, 34.49) | | | 0.49 (0.31, 0.67) |
| Nicaragua | | | 175.05 (142.37, 214.32) | | 198.8 (175.93, 224.44) | | 2.62 (2.13, 3.21) | | | 74.18 (60.85, 89.12) | | 2.94 (2.38, 3.58) | | | 25.38 (18.08, 33.75) | | | 0.19 (-0.09, 0.47) |
| Venezuela (Bolivarian Republic of) | | | 935.42 (757.5, 1155.74) | | 120.45 (100.87, 143.15) | | 3.51 (2.84, 4.34) | | | 55.7 (41.87, 71.73) | | 3.2 (2.6, 3.95) | | | 5.13 (0.09, 10.94) | | | 0.19 (-0.09, 0.46) |
| Zambia | | | 202.81 (165.31, 251.99) | | 92.31 (77.38, 109.85) | | 1.04 (0.85, 1.29) | | | -21.79 (-27.86, -14.66) | | 1.60 (1.29, 1.96) | | | -27.21 (-32.82, -21.17) | | | -1.24 (-1.43, -1.06) |
| Marshall Islands | | | 0.79 (0.64, 0.97) | | 54.48 (39.17, 69.13) | | 1.40 (1.13, 1.73) | | | 24.71 (12.35, 36.54) | | 1.62 (1.31, 1.95) | | | -7.71 (-13.01, -2.05) | | | 0.05 (-0.06, 0.16) |
| Micronesia (Federated States of) | | | 1.54 (1.25, 1.90) | | 15.53 (5.82, 25.23) | | 1.51 (1.22, 1.86) | | | 16.55 (6.75, 26.34) | | 1.68 (1.37, 2.03) | | | -8.65 (-14.46, -3.62) | | | 0.01 (-0.1, 0.11) |
| Samoa | | | 3.71 (3.05, 4.53) | | 30.84 (23.03, 40.02) | | 1.73 (1.43, 2.12) | | | 3.46 (-2.72, 10.71) | | 2.11 (1.71, 2.56) | | | -11.58 (-16.2, -6.44) | | | -0.05 (-0.23, 0.13) |
| Bolivia (Plurinational State of) | | | 265.92 (215.2, 329.44) | | 124.23 (109.59, 141.52) | | 2.25 (1.82, 2.79) | | | 21.29 (13.37, 30.64) | | 2.45 (1.98, 3) | | | -5.87 (-10.67, 0.44) | | | -0.29 (-0.39, -0.18) |
| Myanmar | | | 858.2 (680.88, 1058.54) | | 76.8 (63.28, 93.57) | | 1.52 (1.21, 1.88) | | | 26.72 (17.03, 38.74) | | 1.58 (1.27, 1.93) | | | 1.29 (-4.66, 7.43) | | | 0.13 (-0.01, 0.28) |
| Vanuatu | | | 3.85 (3.14, 4.73) | | 124.57 (110.51, 139.67) | | 1.23 (1.00, 1.51) | | | 9.23 (2.39, 16.57) | | 1.56 (1.27, 1.88) | | | -5.83 (-10.48, -0.74) | | | 0.1 (0, 0.20) |
| Low SDI |  | | |  | | | |  | | |  | | |  | | |  | |
| Yemen | | | 505.48 (413.17, 634.06) | | 149.37 (133.29, 165.16) | | 1.50 (1.23, 1.88) | | | 1.06 (-5.46, 7.46) | | 2.15 (1.73, 2.64) | | | -14.04 (-19.11, -8.71) | | | -0.65 (-0.87, -0.44) |
| Mali | | | 313.64 (256.74, 388.05) | | 155.9 (138.29, 175.17) | | 1.3 (1.07, 1.61) | | | -8.03 (-14.36, -1.11) | | 2.17 (1.75, 2.65) | | | 0.51 (-5.79, 7.68) | | | 0.04 (-0.21, 0.30) |
| Afghanistan | | | 277.76 (224.62, 343.77) | | 152.99 (125.46, 181.39) | | 0.89 (0.72, 1.10) | | | -19.43 (-28.2, -10.39) | | 1.46 (1.18, 1.78) | | | 2.08 (-3.76, 8.68) | | | 0.16 (-0.01, 0.33) |
| Burundi | | | 145.65 (116.49, 182.30) | | 64.05 (52.38, 75.06) | | 1.10 (0.88, 1.38) | | | -31.09 (-35.99, -26.46) | | 1.70 (1.36, 2.08) | | | -32.46 (-36.61, -27.92) | | | -1.52 (-1.71, -1.33) |
| Niger | | | 301.69 (247.07, 374.74) | | 235.57 (208.57, 256.86) | | 1.20 (0.99, 1.50) | | | 7.65 (-1.01, 14.48) | | 2.16 (1.74, 2.65) | | | 13.58 (5.14, 21.59) | | | 0.7 (0.51, 0.89) |
| Timor-Leste | | | 19.71 (15.94, 24.13) | | 119.47 (102.34, 138.13) | | 1.41 (1.14, 1.73) | | | 22.65 (13.08, 33.08) | | 1.81 (1.47, 2.21) | | | 4.63 (-1.35, 10.38) | | | 0.19 (0.12, 0.26) |
| Nepal | | | 445.16 (362.01, 545.37) | | 117.86 (103.84, 132.40) | | 1.43 (1.16, 1.75) | | | 36.26 (27.49, 45.35) | | 1.59 (1.29, 1.94) | | | 6.81 (0.48, 13.77) | | | 0.21 (0.17, 0.26) |
| Senegal | | | 268.26 (221.43, 331.61) | | 78.33 (67.35, 91) | | 1.69 (1.40, 2.09) | | | -14.18 (-19.46, -8.08) | | 2.37 (1.92, 2.90) | | | -22.45 (-26.93, -17.09) | | | -1.15 (-1.62, -0.67) |
| Sierra Leone | | | 131 (106.08, 162.81) | | 126.27 (110.67, 143.26) | | 1.48 (1.20, 1.84) | | | 5.94 (-1.37, 13.90) | | 2.18 (1.76, 2.71) | | | 8.79 (1.05, 17.53) | | | 0.6 (0.27, 0.93) |
| Benin | | | 215.66 (176.28, 267.46) | | 170.67 (152.9, 191.91) | | 1.60 (1.31, 1.98) | | | -2.74 (-9.13, 4.89) | | 2.54 (2.05, 3.10) | | | -4.21 (-10.97, 3.24) | | | 0.69 (0.2, 1.18) |
| Togo | | | 121.1 (98.24, 150.40) | | 114.4 (98.4, 130.57) | | 1.45 (1.17, 1.80) | | | -6.6 (-13.57, 0.45) | | 2.05 (1.66, 2.51) | | | -20.95 (-25.4, -15.81) | | | -0.4 (-0.76, -0.05) |
| Eritrea | | | 82.84 (66.5, 103.99) | | 83.09 (69.73, 98.34) | | 1.26 (1.01, 1.58) | | | -5.49 (-12.38, 2.39) | | 1.77 (1.42, 2.15) | | | -19.24 (-25.18, -13.01) | | | -0.83 (-0.95, -0.70) |
| South Sudan | | | 117.69 (95.08, 146.83) | | 53.81 (44.12, 65.02) | | 1.22 (0.98, 1.52) | | | -6.54 (-12.43, 0.27) | | 1.85 (1.49, 2.26) | | | -6.59 (-11.84, -1.33) | | | -0.6 (-0.82, -0.38) |
| Burkina Faso | | | 303.37 (249.64, 371.05) | | 131.97 (116, 150.09) | | 1.33 (1.10, 1.63) | | | -2.89 (-9.58, 4.69) | | 2.10 (1.71, 2.57) | | | -2.1 (-8.73, 5.76) | | | 0.11 (-0.13, 0.36) |
| Angola | | | 330.89 (268.91, 408.28) | | 172.47 (154.23, 194.66) | | 1.01 (0.82, 1.25) | | | -14.39 (-20.12, -7.42) | | 1.61 (1.31, 1.97) | | | -13.75 (-19.42, -6.71) | | | -0.39 (-0.53, -0.25) |
| Ethiopia | | | 1856.64 (1521.26, 2307.14) | | 136.01 (127.9, 143.81) | | 1.7 (1.40, 2.12) | | | 9.56 (5.79, 13.18) | | 2.53 (2.06, 3.09) | | | 2 (-1.33, 4.82) | | | -0.41 (-0.59, -0.24) |
| Central African Republic | | | 61.02 (48.59, 75.82) | | 86.85 (75.61, 99.98) | | 1.11 (0.89, 1.38) | | | -6.96 (-12.56, -0.43) | | 1.67 (1.35, 2.03) | | | -9.57 (-15.36, -3.71) | | | -0.35 (-0.42, -0.29) |
| Chad | | | 214.46 (173.58, 268.42) | | 208.46 (184.29, 238.66) | | 1.21 (0.98, 1.51) | | | 4.73 (-3.48, 14.99) | | 2.13 (1.71, 2.63) | | | 18.78 (9.96, 27.34) | | | 0.95 (0.78, 1.12) |
| Cote d'Ivoire | | | 377.02 (304.79, 469.32) | | 117.97 (102.54, 133.40) | | 1.35 (1.09, 1.68) | | | -4.57 (-11.33, 2.18) | | 2.01 (1.64, 2.45) | | | -13.07 (-18.57, -7.43) | | | -0.27 (-0.49, -0.04) |
| Gambia | | | 32.73 (26.76, 40.54) | | 143.76 (130.85, 159.39) | | 1.37 (1.12, 1.69) | | | -0.06 (-5.35, 6.35) | | 2.03 (1.65, 2.50) | | | -7.92 (-12.82, -2.13) | | | 0.17 (-0.15, 0.49) |
| Madagascar | | | 380.3 (304.1, 479.37) | | 115.1 (99.74, 131.77) | | 1.33 (1.06, 1.68) | | | -10.36 (-16.76, -3.42) | | 1.96 (1.58, 2.39) | | | -14.56 (-19.89, -8.92) | | | -0.94 (-1.13, -0.75) |
| Malawi | | | 202.87 (163.13, 252.97) | | 54.91 (44.57, 67.23) | | 1.04 (0.84, 1.30) | | | -21.89 (-27.11, -15.68) | | 1.60 (1.29, 1.95) | | | -25.24 (-30.28, -19.58) | | | -1.38 (-1.55, -1.21) |
| Guinea | | | 194.87 (159.49, 238.51) | | 122.63 (106.3, 141.28) | | 1.45 (1.19, 1.78) | | | -0.63 (-7.93, 7.69) | | 2.25 (1.83, 2.71) | | | 8.41 (0.46, 16.92) | | | 0.76 (0.53, 0.99) |
| Guinea-Bissau | | | 26.8 (21.94, 33.63) | | 135.78 (119.91, 152.20) | | 1.30 (1.06, 1.63) | | | 15.05 (7.31, 23.06) | | 2.07 (1.68, 2.53) | | | 14.31 (7.43, 22.57) | | | 0.89 (0.68, 1.10) |
| Liberia | | | 82.42 (67.47, 103.25) | | 61.82 (50.83, 75.37) | | 1.51 (1.24, 1.89) | | | -27.07 (-32.02, -20.96) | | 2.21 (1.79, 2.73) | | | -28.49 (-32.76, -23.98) | | | 0.29 (-0.35, 0.94) |
| Mozambique | | | 331.36 (268.25, 411.57) | | 86.38 (72.37, 100.35) | | 1.07 (0.86, 1.32) | | | -19.86 (-25.89, -13.86) | | 1.73 (1.40, 2.13) | | | -14.62 (-20.51, -8.34) | | | -0.7 (-0.82, -0.58) |
| Rwanda | | | 165.05 (133.33, 206.34) | | 37.07 (26.61, 49.91) | | 1.24 (1.00, 1.55) | | | -25.74 (-31.4, -18.78) | | 1.69 (1.36, 2.11) | | | -36.91 (-41.64, -31.64) | | | -1.69 (-1.94, -1.45) |
| Uganda | | | 529.6 (432.42, 654.19) | | 65.19 (54.69, 77.39) | | 1.22 (1.00, 1.51) | | | -34.06 (-38.25, -29.19) | | 2.00 (1.60, 2.41) | | | -34.18 (-38.42, -29.19) | | | -1.34 (-1.88, -0.79) |
| Somalia | | | 215.23 (171.36, 270.66) | | 123.33 (107.66, 139.25) | | 1.00 (0.79, 1.25) | | | -17.94 (-23.7, -12.09) | | 1.73 (1.39, 2.12) | | | -16.59 (-22.41, -11.03) | | | -0.69 (-0.82, -0.55) |
| Solomon Islands | | | 8.78 (7.16, 10.88) | | 116.34 (101.77, 131.13) | | 1.28 (1.05, 1.59) | | | 7.31 (0.08, 14.64) | | 1.68 (1.35, 2.03) | | | -6.77 (-12.3, -1.26) | | | 0.09 (-0.02, 0.20) |
| Haiti | | | 189.13 (151.8, 236.79) | | 113.93 (100.09, 130.32) | | 1.47 (1.18, 1.84) | | | 6.11 (-0.75, 14.24) | | 1.85 (1.48, 2.27) | | | -6.07 (-11.16, 0.16) | | | -0.32 (-0.44, -0.21) |
| Papua New Guinea | | | 140.86 (113.25, 173.92) | | 157.56 (140.62, 175.37) | | 1.35 (1.08, 1.66) | | | 1.02 (-5.63, 8.01) | | 1.78 (1.43, 2.16) | | | -7.34 (-12.83, -1.82) | | | 0.05 (-0.06, 0.16) |
| United Republic of Tanzania | | | 715.34 (575.53, 881.81) | | 85.05 (72.92, 98.45) | | 1.22 (0.98, 1.51) | | | -18.2 (-23.56, -12.27) | | 1.79 (1.44, 2.17) | | | -23.24 (-27.93, -18.23) | | | -0.75 (-1.18, -0.31) |
| Democratic Republic of the Congo | | | 1165.86 (943.85, 1452.19) | | 55.19 (43.41, 67.66) | | 1.30 (1.05, 1.61) | | | -34.23 (-39.23, -28.95) | | 1.93 (1.55, 2.33) | | | -38.46 (-42.76, -33.49) | | | -1.35 (-1.56, -1.14) |

⁎Parentheses for all GBD health estimate indicate 95% uncertainty intervals.

**Abbreviation:** ASR, age-standardized rates; EAPC, estimated annual percentage change; GBD, Global Burden of Diseases; PAH, pulmonary arterial hypertension; SDI, Socio-demographic Index.

**Table S5.** The temporal change of DALYs from PAH by SDI quintiles in 204 countries and territories during 1990-2021.

| Location | | | Number* in 2021 | | Percent change of cases, 1990–2021, % | | All-age rate in 2021, per 100,000 | | | Percent change of all-age rate, 1990–2021, % | | ASR in 2021, per 100,000 | | | Percent change of ASR, 1990–2021, % | | | EAPC |
| --- | --- | --- | --- | --- | --- | --- | --- | --- | --- | --- | --- | --- | --- | --- | --- | --- | --- | --- |
| High SDI |  | | |  | | | |  | | |  | | |  | | |  | |
| Luxembourg | | | 45.55 (40.54, 50.81) | | 28.28 (14.11, 44.26) | | 7.07 (6.29, 7.89) | | | -24.1 (-32.49, -14.65) | | 5.06 (4.54, 5.64) | | | -38.92 (-45.99, -31.55) | | | -1.93 (-2.55, -1.30) |
| Singapore | | | 207.22 (187.16, 227.83) | | -33.4 (-40.53, -25.40) | | 3.62 (3.27, 3.98) | | | -64.57 (-68.36, -60.31) | | 3.83 (3.44, 4.27) | | | -67.09 (-71.16, -62.73) | | | -3.2 (-3.57, -2.82) |
| Poland | | | 2111.87 (1911.59, 2297.01) | | -13.26 (-26.67, 2.17) | | 5.52 (5.00, 6.01) | | | -13.41 (-26.8, 2) | | 3.95 (3.58, 4.29) | | | -34.69 (-44.8, -23.36) | | | -1.58 (-1.92, -1.25) |
| Netherlands | | | 1004.24 (915.13, 1106.04) | | 15.03 (5.25, 26.10) | | 5.83 (5.32, 6.43) | | | -0.27 (-8.74, 9.33) | | 3.91 (3.61, 4.26) | | | -27.28 (-32.92, -21.22) | | | -1.37 (-2.14, -0.59) |
| Australia | | | 1207.15 (1087.4, 1333.48) | | -8.71 (-29.59, 9.06) | | 4.68 (4.22, 5.17) | | | -40.33 (-53.98, -28.71) | | 3.69 (3.36, 4.03) | | | -52.84 (-63.43, -43.98) | | | -2.48 (-2.9, -2.07) |
| United States Virgin Islands | | | 6.06 (4.33, 8.63) | | -65.53 (-76.92, -43.55) | | 7.05 (5.04, 10.05) | | | -57.44 (-71.51, -30.30) | | 6.40 (4.53, 8.82) | | | -62.27 (-75.89, -35.44) | | | -3.04 (-3.37, -2.70) |
| Bermuda | | | 15.59 (13.17, 18.87) | | -53.9 (-63.66, -42.73) | | 24.5 (20.7, 29.7) | | | -56.92 (-66.04, -46.48) | | 15.69 (13.06, 19.07) | | | -71.73 (-77.56, -64.71) | | | -5.13 (-5.6, -4.65) |
| Norway | | | 132.81 (121.41, 148.29) | | -53.69 (-57.11, -50.04) | | 2.45 (2.24, 2.74) | | | -63.71 (-66.39, -60.85) | | 1.92 (1.77, 2.11) | | | -73.33 (-75.38, -71.17) | | | -5.13 (-6.23, -4.03) |
| New Zealand | | | 226.37 (206.88, 249.31) | | 17.92 (6.55, 31.15) | | 4.38 (4.00, 4.82) | | | -22.05 (-29.56, -13.31) | | 3.55 (3.26, 3.89) | | | -33.34 (-39.7, -26.05) | | | -1.58 (-2.38, -0.77) |
| Sweden | | | 603.82 (539.78, 678.23) | | 4.48 (-5.25, 14.62) | | 5.82 (5.20, 6.54) | | | -13.51 (-21.56, -5.11) | | 4.14 (3.73, 4.63) | | | -31.92 (-38.28, -25.33) | | | -1.33 (-1.74, -0.92) |
| Andorra | | | 4.14 (2.8, 5.90) | | -5.56 (-40.71, 49.37) | | 4.83 (3.27, 6.89) | | | -40.02 (-62.35, -5.13) | | 3.55 (2.51, 4.90) | | | -61.55 (-76.11, -38.07) | | | -2.87 (-3, -2.74) |
| Switzerland | | | 714.97 (633.62, 793.84) | | -22.85 (-39.02, -9.46) | | 8.01 (7.10, 8.90) | | | -40.63 (-53.08, -30.33) | | 5.12 (4.64, 5.63) | | | -57.63 (-66.69, -49.54) | | | -3 (-3.36, -2.64) |
| Estonia | | | 24.37 (20.88, 28.38) | | 29.2 (10.42, 48.98) | | 1.86 (1.59, 2.16) | | | 54.6 (32.13, 78.27) | | 1.12 (0.96, 1.29) | | | -4.38 (-16.4, 8.78) | | | 0.48 (-0.87, 1.85) |
| Austria | | | 494.91 (449.81, 541.70) | | -2.69 (-11.6, 6.27) | | 5.51 (5.01, 6.03) | | | -15.84 (-23.55, -8.10) | | 3.47 (3.21, 3.77) | | | -36.42 (-41.82, -30.95) | | | -1.28 (-1.92, -0.64) |
| Belgium | | | 900.33 (801.35, 980.95) | | -19.02 (-36.53, -8.10) | | 7.85 (6.99, 8.55) | | | -29.54 (-44.78, -20.05) | | 5.18 (4.74, 5.60) | | | -45.47 (-57.63, -37.74) | | | -1.94 (-2.23, -1.66) |
| Georgia | | | 1317.7 (1039.2, 1665.07) | | 74.36 (23.99, 147.36) | | 36.53 (28.81, 46.16) | | | 166.96 (89.83, 278.72) | | 27.83 (22.18, 34.82) | | | 110.52 (51.04, 198.12) | | | 3.48 (2.55, 4.42) |
| Greenland | | | 3.78 (2.78, 5.57) | | -76.36 (-86.9, -25.30) | | 6.74 (4.95, 9.92) | | | -76.59 (-87.03, -26.02) | | 7.06 (5.05, 10.16) | | | -77.64 (-87.73, -34.81) | | | -5.5 (-5.81, -5.18) |
| Slovakia | | | 154 (99.9, 267.81) | | -18.96 (-41.79, 19.08) | | 2.84 (1.84, 4.93) | | | -21.14 (-43.36, 15.87) | | 2.04 (1.32, 3.61) | | | -40.11 (-56.93, -11.66) | | | -1.47 (-1.71, -1.23) |
| United Kingdom | | | 3037.04 (2871.89, 3181.12) | | -16.7 (-32.91, -5.71) | | 4.48 (4.23, 4.69) | | | -29.65 (-43.34, -20.37) | | 3.73 (3.54, 3.92) | | | -42.08 (-53.1, -32.70) | | | -1.53 (-1.64, -1.41) |
| Kuwait | | | 206.86 (174.05, 243.43) | | 202.17 (143.42, 270.47) | | 4.45 (3.74, 5.23) | | | 11.67 (-10.04, 36.92) | | 6.51 (5.41, 7.73) | | | 56.14 (27.33, 91.26) | | | 3.11 (1.51, 4.74) |
| Monaco | | | 2.79 (1.9, 3.85) | | 10.86 (-22.33, 57.75) | | 7.36 (5.02, 10.17) | | | -10.96 (-37.61, 26.71) | | 4.46 (3.07, 6.12) | | | -19.38 (-46.15, 18.73) | | | -0.9 (-1.11, -0.68) |
| Slovenia | | | 38.21 (32.76, 44.40) | | 28.32 (7.62, 51.26) | | 1.85 (1.58, 2.15) | | | 22.36 (2.62, 44.23) | | 1.03 (0.88, 1.21) | | | -20.1 (-32.8, -6.24) | | | -0.81 (-1.03, -0.60) |
| Latvia | | | 89.06 (76.7, 101.80) | | 170.8 (120.07, 231.36) | | 4.76 (4.10, 5.44) | | | 284.85 (212.77, 370.92) | | 2.89 (2.51, 3.30) | | | 147.38 (105.34, 198.56) | | | 3.32 (1.51, 5.17) |
| San Marino | | | 0.91 (0.59, 1.90) | | 4.49 (-27.51, 48.56) | | 2.79 (1.81, 5.80) | | | -24.19 (-47.41, 7.79) | | 1.61 (1.07, 3.13) | | | -49.67 (-65.87, -29.18) | | | -1.45 (-1.68, -1.22) |
| Taiwan (Province of China) | | | 1514.76 (1353.04, 1648.99) | | 273.94 (232.61, 312.52) | | 6.41 (5.72, 6.98) | | | 222.59 (186.94, 255.88) | | 4.19 (3.77, 4.54) | | | 74.19 (58.06, 89.73) | | | 4.76 (3.48, 6.06) |
| Qatar | | | 68.65 (37.26, 102.12) | | 268.68 (37.7, 521.19) | | 2.31 (1.25, 3.43) | | | -44.91 (-79.42, -7.18) | | 3.75 (1.96, 5.57) | | | -29.74 (-72.56, 15.50) | | | -0.15 (-0.76, 0.45) |
| Lithuania | | | 99.58 (87.33, 113.49) | | 57.9 (34.5, 86.50) | | 3.65 (3.20, 4.16) | | | 112.65 (81.13, 151.17) | | 2.30 (2.04, 2.58) | | | 34.28 (15.29, 56.76) | | | 1.92 (0.34, 3.52) |
| Cyprus | | | 304.62 (165.54, 379.34) | | -19.18 (-38.26, 17.70) | | 22.44 (12.19, 27.94) | | | -53.69 (-64.62, -32.55) | | 17.45 (9.61, 21.85) | | | -66.65 (-74.35, -50.55) | | | -3.64 (-3.78, -3.51) |
| Iceland | | | 17.01 (14.92, 19.11) | | 18.05 (2.94, 33.85) | | 4.85 (4.26, 5.45) | | | -14.46 (-25.4, -3.01) | | 3.79 (3.36, 4.27) | | | -31.68 (-40.31, -22.63) | | | -1.45 (-2.1, -0.80) |
| Saudi Arabia | | | 871.78 (464.94, 1517.88) | | -8.46 (-50.21, 61.54) | | 2.31 (1.23, 4.03) | | | -61.5 (-79.06, -32.06) | | 2.62 (1.45, 5.39) | | | -53.63 (-73.63, -21.85) | | | -2.03 (-2.54, -1.52) |
| Japan | | | 18489.96 (16064.33, 20369.62) | | 18.27 (4.58, 28.95) | | 14.48 (12.58, 15.95) | | | 16.54 (3.04, 27.06) | | 10.72 (10.03, 11.46) | | | -24.06 (-28.26, -19.05) | | | -1.31 (-1.56, -1.06) |
| Denmark | | | 425.87 (384.37, 462.44) | | -10.16 (-19.2, -0.02) | | 7.28 (6.57, 7.90) | | | -21.03 (-28.98, -12.12) | | 4.80 (4.39, 5.20) | | | -44.37 (-50.08, -37.96) | | | -1.83 (-2.39, -1.27) |
| Republic of Korea | | | 1245.74 (841.77, 2906.39) | | -49.67 (-71.16, -4.41) | | 2.42 (1.63, 5.64) | | | -56.82 (-75.26, -17.99) | | 2.40 (1.67, 4.75) | | | -63.21 (-78.52, -36.13) | | | -3.11 (-3.17, -3.06) |
| Ireland | | | 189.66 (171.64, 208.93) | | 12.86 (1.47, 26.21) | | 3.84 (3.47, 4.23) | | | -17.73 (-26.03, -8) | | 3.02 (2.74, 3.33) | | | -34.13 (-40.8, -26.69) | | | -1.45 (-2.13, -0.76) |
| Czechia | | | 1898.89 (1608.4, 2169.62) | | 31.41 (4.57, 60.16) | | 17.86 (15.13, 20.41) | | | 27.23 (1.25, 55.07) | | 11.11 (9.35, 12.86) | | | -7.6 (-27.38, 13.92) | | | -0.05 (-0.31, 0.20) |
| United Arab Emirates | | | 433.66 (265.84, 540.84) | | 3.65 (-30.61, 66.53) | | 4.50 (2.76, 5.62) | | | -79.87 (-86.52, -67.65) | | 10.31 (5.63, 13.04) | | | -61.51 (-73.46, -39.41) | | | -1.56 (-2.01, -1.11) |
| Canada | | | 2170.58 (1981.56, 2336.85) | | -29.21 (-35.59, -22.50) | | 5.79 (5.29, 6.24) | | | -48.51 (-53.15, -43.63) | | 4.63 (4.23, 4.99) | | | -59.27 (-63, -55.27) | | | -4.24 (-4.97, -3.51) |
| Puerto Rico | | | 158.46 (132.47, 185.01) | | -80.97 (-84.37, -77.21) | | 4.81 (4.02, 5.62) | | | -79.13 (-82.86, -75.01) | | 3.98 (3.33, 4.67) | | | -83.23 (-86.15, -79.99) | | | -6.72 (-7.13, -6.32) |
| Finland | | | 177.96 (159.65, 198.45) | | 2.63 (-11.28, 19.36) | | 3.21 (2.88, 3.58) | | | -7.12 (-19.71, 8.02) | | 2.13 (1.95, 2.35) | | | -31.6 (-40.45, -21.16) | | | -1.03 (-1.67, -0.40) |
| United States of America | | | 36197.64 (33003.84, 38647.83) | | 33.46 (19.66, 46.14) | | 10.88 (9.92, 11.62) | | | 1.94 (-8.6, 11.63) | | 8.08 (7.49, 8.60) | | | -19.24 (-27.75, -12.15) | | | -0.81 (-0.94, -0.69) |
| France | | | 6113.49 (5521.05, 6689.37) | | 2.77 (-18.64, 24.75) | | 9.21 (8.32, 10.08) | | | -10.57 (-29.2, 8.55) | | 6.05 (5.6, 6.55) | | | -33.05 (-47.05, -20.89) | | | -1.26 (-1.52, -1) |
| Germany | | | 9440.98 (8306.11, 10352.48) | | 12.23 (-5.03, 36.35) | | 11.06 (9.73, 12.13) | | | 5.09 (-11.07, 27.68) | | 6.42 (5.86, 6.91) | | | -32.3 (-41.26, -18.03) | | | -0.84 (-1.53, -0.13) |
| High Middle SDI | |  | | | |  | | |  | | | |  | | |  | | |
| American Samoa | | | 1.93 (1.12, 3.72) | | 0.47 (-33.22, 40.26) | | 3.89 (2.25, 7.48) | | | -2.06 (-34.91, 36.72) | | 4.15 (2.45, 8.06) | | | -19.05 (-43.58, 9.64) | | | -0.59 (-0.62, -0.56) |
| Malta | | | 18.15 (16.19, 20.21) | | 52.85 (36.21, 71.18) | | 4.10 (3.66, 4.57) | | | 28.09 (14.15, 43.45) | | 2.90 (2.55, 3.27) | | | -9.36 (-19.68, 2.40) | | | -0.51 (-1.11, 0.10) |
| Antigua and Barbuda | | | 1.42 (1.3, 1.57) | | -44.05 (-52.28, -34.81) | | 1.59 (1.45, 1.76) | | | -62.3 (-67.85, -56.08) | | 1.50 (1.37, 1.64) | | | -66.14 (-70.77, -60.67) | | | -4.36 (-4.84, -3.87) |
| Kazakhstan | | | 268.02 (220.16, 315.99) | | 1.57 (-22.02, 34.92) | | 1.41 (1.16, 1.67) | | | -12.16 (-32.57, 16.68) | | 1.49 (1.23, 1.74) | | | -14.64 (-34.42, 14.47) | | | -0.97 (-1.26, -0.68) |
| Romania | | | 3948.61 (3383.73, 4490.62) | | 11.67 (-9.7, 43.17) | | 20.85 (17.87, 23.71) | | | 37.86 (11.48, 76.74) | | 13.92 (12.01, 15.83) | | | -1.92 (-20.2, 23.80) | | | -0.36 (-0.66, -0.07) |
| Portugal | | | 1021.59 (916.59, 1117.23) | | 15.36 (3.49, 26.96) | | 9.63 (8.64, 10.53) | | | 10.24 (-1.1, 21.32) | | 5.82 (5.35, 6.28) | | | -35.21 (-40.36, -29.50) | | | -1.65 (-2.2, -1.10) |
| Bahamas | | | 59.03 (46.73, 74.97) | | -43.81 (-56.32, -27.10) | | 15.21 (12.04, 19.32) | | | -62.82 (-71.1, -51.76) | | 14.75 (11.7, 18.62) | | | -66.69 (-74.06, -56.62) | | | -4.43 (-4.98, -3.88) |
| Spain | | | 4291.57 (3844.77, 4655.45) | | 14.67 (3.65, 25.54) | | 9.42 (8.44, 10.22) | | | -2.37 (-11.75, 6.89) | | 6.00 (5.52, 6.41) | | | -34.64 (-39.72, -28.94) | | | -1.56 (-2.12, -1.01) |
| Barbados | | | 43.13 (34.29, 53.97) | | -55.75 (-66.02, -44.16) | | 14.42 (11.47, 18.05) | | | -62.5 (-71.2, -52.68) | | 11.88 (9.32, 15.07) | | | -68.73 (-76.26, -59.97) | | | -4.71 (-5.24, -4.18) |
| Serbia | | | 337.04 (214.51, 618.06) | | -8.62 (-34.88, 32.10) | | 3.78 (2.40, 6.93) | | | -1.34 (-29.69, 42.61) | | 2.43 (1.58, 4.62) | | | -35.31 (-54.14, -5.69) | | | -1.54 (-1.65, -1.44) |
| Cook Islands | | | 0.94 (0.58, 1.98) | | -45.03 (-67.15, -13.86) | | 5.30 (3.28, 11.17) | | | -41.39 (-64.98, -8.15) | | 5.26 (3.14, 10.93) | | | -46.47 (-68.18, -12.63) | | | -2.6 (-2.8, -2.39) |
| Bahrain | | | 48.22 (24.24, 82.98) | | 67.39 (-19.39, 154.93) | | 3.15 (1.58, 5.42) | | | -44.58 (-73.31, -15.59) | | 4.52 (2.26, 8.02) | | | -31.58 (-65.28, 2.39) | | | -0.5 (-1.19, 0.18) |
| Argentina | | | 3409 (3182.59, 3695.20) | | -47.71 (-55.1, -39.01) | | 7.49 (7.00, 8.12) | | | -61.93 (-67.31, -55.60) | | 7.12 (6.62, 7.76) | | | -64.21 (-69.35, -58.15) | | | -3.16 (-3.31, -3.02) |
| Georgia | | | 1317.7 (1039.2, 1665.07) | | 74.36 (23.99, 147.36) | | 36.53 (28.81, 46.16) | | | 166.96 (89.83, 278.72) | | 27.83 (22.18, 34.82) | | | 110.52 (51.04, 198.12) | | | 3.48 (2.55, 4.42) |
| Chile | | | 1111.86 (1027.58, 1201.12) | | -4.04 (-13.72, 6.30) | | 5.91 (5.47, 6.39) | | | -32.18 (-39.02, -24.87) | | 5.45 (4.99, 5.90) | | | -39.73 (-45.51, -33.28) | | | -1.84 (-2.21, -1.46) |
| Guam | | | 4.21 (2.27, 8.18) | | -19.46 (-45.88, 11.46) | | 2.64 (1.42, 5.14) | | | -30.79 (-53.49, -4.21) | | 2.53 (1.37, 4.91) | | | -43.92 (-60.59, -23.82) | | | -1.12 (-1.39, -0.85) |
| Jordan | | | 253.26 (124.39, 686.32) | | 107.3 (-21.47, 287.04) | | 2.05 (1.01, 5.57) | | | -37.17 (-76.2, 17.32) | | 2.45 (1.20, 6.89) | | | -11.37 (-63.79, 65.10) | | | 0.57 (0.09, 1.05) |
| Saint Kitts and Nevis | | | 1.38 (1.14, 1.70) | | -56.58 (-71.56, -43.06) | | 2.36 (1.95, 2.89) | | | -69.29 (-79.89, -59.73) | | 2.32 (1.90, 2.81) | | | -71.47 (-81.33, -62.45) | | | -4.95 (-5.48, -4.41) |
| Lebanon | | | 617.44 (485.42, 814.01) | | -34.85 (-59.6, 28.30) | | 11.14 (8.76, 14.69) | | | -64.82 (-78.18, -30.72) | | 11.26 (8.86, 14.49) | | | -64.78 (-78.1, -36.68) | | | -3.55 (-3.64, -3.45) |
| Russian Federation | | | 6389.11 (5934.38, 6897.28) | | -65.61 (-71.5, -60.19) | | 4.41 (4.1, 4.76) | | | -64.15 (-70.29, -58.51) | | 3.62 (3.38, 3.89) | | | -71.41 (-75.91, -67.31) | | | -4.81 (-5.26, -4.36) |
| Belarus | | | 185.48 (153.81, 219.53) | | -16.38 (-37.39, 2.74) | | 1.99 (1.65, 2.35) | | | -6.34 (-29.87, 15.07) | | 1.63 (1.37, 1.89) | | | -26.96 (-46.9, -8.74) | | | -1.22 (-1.38, -1.05) |
| Libya | | | 1003.58 (437.2, 1781.92) | | -12.4 (-63.11, 49.55) | | 14.61 (6.36, 25.94) | | | -46.26 (-77.37, -8.25) | | 20.43 (8.75, 36.65) | | | 0.75 (-57.33, 77.82) | | | 1.16 (0.77, 1.56) |
| Republic of Moldova | | | 22.22 (17.53, 28.72) | | 28.74 (16.51, 46.57) | | 0.62 (0.49, 0.80) | | | 59.34 (44.2, 81.39) | | 0.54 (0.44, 0.68) | | | 38.56 (22.62, 62.74) | | | 1.63 (0.64, 2.62) |
| Mauritius | | | 398.21 (351.08, 433.75) | | 262.52 (213.71, 308.62) | | 31.31 (27.6, 34.10) | | | 212.35 (170.3, 252.08) | | 28.96 (25.61, 31.57) | | | 165.4 (129.12, 199.38) | | | 5.5 (4.6, 6.41) |
| Niue | | | 0.17 (0.1, 0.35) | | -9.84 (-36.92, 23.91) | | 10.01 (6.2, 20.82) | | | 24.45 (-12.93, 71.04) | | 11.14 (7.04, 23.27) | | | 33.99 (-6.57, 86.85) | | | -0.53 (-1.04, -0.02) |
| Malaysia | | | 757.2 (518.62, 1870.73) | | 48.26 (-0.74, 103.69) | | 2.38 (1.63, 5.88) | | | -17.66 (-44.88, 13.12) | | 2.48 (1.66, 6.63) | | | -23.07 (-46.45, 3.98) | | | -0.55 (-0.82, -0.28) |
| Seychelles | | | 3.1 (1.9, 6.74) | | 7.11 (-23.39, 45.77) | | 2.94 (1.80, 6.39) | | | -25.97 (-47.05, 0.75) | | 2.86 (1.75, 6.44) | | | -32.72 (-52.05, -9.48) | | | -0.83 (-0.94, -0.72) |
| Bosnia and Herzegovina | | | 295.12 (212.39, 381.15) | | -14.11 (-40.15, 26.63) | | 8.94 (6.43, 11.54) | | | 16.98 (-18.48, 72.46) | | 5.91 (4.25, 7.68) | | | -25.14 (-47.9, 9.71) | | | -1.22 (-1.37, -1.08) |
| Oman | | | 133.7 (51.07, 241.29) | | 54.5 (-55.16, 240.55) | | 2.84 (1.09, 5.13) | | | -34.82 (-81.08, 43.67) | | 3.90 (1.49, 7.22) | | | -6.73 (-70.29, 107.60) | | | 1.16 (0.06, 2.27) |
| Hungary | | | 725.02 (590.13, 907.97) | | -42.84 (-56.57, -28.51) | | 7.55 (6.15, 9.46) | | | -38.09 (-52.96, -22.57) | | 4.66 (3.75, 5.82) | | | -54.03 (-65.1, -42.50) | | | -1.88 (-2.66, -1.09) |
| Dominica | | | 2.26 (1.65, 3.82) | | -45.74 (-64.16, -9.67) | | 3.36 (2.46, 5.70) | | | -41.42 (-61.3, -2.47) | | 3.46 (2.49, 5.66) | | | -42.96 (-62.26, -6.32) | | | -2.4 (-2.65, -2.15) |
| Ukraine | | | 1546.73 (1172.39, 1956.09) | | -8.86 (-32.4, 17.63) | | 3.59 (2.72, 4.54) | | | 11.52 (-17.27, 43.95) | | 3.05 (2.37, 3.83) | | | 2.15 (-23.9, 30.10) | | | 0.02 (-0.3, 0.34) |
| Northern Mariana Islands | | | 1.68 (1.05, 3.40) | | 23.27 (-13.04, 74.46) | | 3.47 (2.16, 7.01) | | | 14.7 (-19.09, 62.33) | | 3.36 (2.06, 6.99) | | | -13.72 (-36.52, 16.06) | | | -0.46 (-0.55, -0.38) |
| Uruguay | | | 218.2 (200.03, 238.37) | | -28.55 (-37.24, -16.58) | | 6.41 (5.87, 7.00) | | | -34.13 (-42.15, -23.10) | | 5.44 (4.97, 5.99) | | | -43.96 (-50.91, -34.04) | | | -2.12 (-2.23, -2.02) |
| Brunei Darussalam | | | 45.45 (26.8, 58.34) | | -15.63 (-38.36, 30.64) | | 10.07 (5.94, 12.93) | | | -51.51 (-64.58, -24.93) | | 11.44 (7.20, 14.88) | | | -44.51 (-58.81, -17.69) | | | -1.59 (-1.69, -1.49) |
| Bulgaria | | | 285.98 (216.79, 375.62) | | -41.06 (-58, -18.18) | | 4.21 (3.19, 5.53) | | | -24.62 (-46.28, 4.64) | | 2.87 (2.19, 3.74) | | | -41.37 (-58.45, -18.49) | | | -1.04 (-1.61, -0.45) |
| China | | | 150940.71 (99583.31, 186503.40) | | 0.83 (-38.15, 46.22) | | 10.61 (7.00, 13.11) | | | -16.63 (-48.85, 20.91) | | 8.95 (6.04, 11.13) | | | -44.69 (-65.55, -20.68) | | | -1.38 (-1.73, -1.03) |
| Croatia | | | 92.27 (78.16, 108.44) | | -51.74 (-59.28, -42.06) | | 2.19 (1.86, 2.58) | | | -44.26 (-52.96, -33.07) | | 1.31 (1.11, 1.53) | | | -62.23 (-68.1, -55.01) | | | -2.22 (-2.86, -1.57) |
| Trinidad and Tobago | | | 110.36 (84.94, 141.81) | | -52.72 (-64.88, -37.73) | | 7.92 (6.10, 10.18) | | | -59.11 (-69.62, -46.15) | | 7.72 (5.91, 9.91) | | | -63.15 (-72.52, -51.34) | | | -4.29 (-4.89, -3.69) |
| Türkiye | | | 12652.38 (9855.73, 15875.26) | | -60.4 (-74.58, -15.69) | | 15.13 (11.79, 18.99) | | | -72.78 (-82.53, -42.05) | | 16.56 (12.93, 20.56) | | | -69.29 (-78.89, -43.46) | | | -3.52 (-3.62, -3.42) |
| North Macedonia | | | 89.81 (46.67, 153.39) | | 0.47 (-43.38, 49.48) | | 4.13 (2.14, 7.05) | | | -8.03 (-48.17, 36.83) | | 3.18 (1.68, 5.83) | | | -32.69 (-61.6, -1.65) | | | -1.59 (-1.84, -1.34) |
| Palau | | | 0.76 (0.38, 1.58) | | -6.83 (-33.99, 29.65) | | 4.22 (2.10, 8.74) | | | -21.78 (-44.58, 8.84) | | 4.37 (2.21, 9.17) | | | -30.72 (-49.58, -6.06) | | | -1.05 (-1.12, -0.98) |
| Israel | | | 795.58 (718.73, 869.32) | | -0.23 (-25.78, 17.13) | | 8.29 (7.49, 9.06) | | | -48.41 (-61.62, -39.43) | | 7.18 (6.52, 7.81) | | | -55.8 (-67.19, -48.44) | | | -2.41 (-2.76, -2.06) |
| Italy | | | 2779.45 (2503.88, 3032.67) | | -41.25 (-45.62, -37.29) | | 4.65 (4.19, 5.07) | | | -44.21 (-48.36, -40.44) | | 2.78 (2.58, 2.99) | | | -61.22 (-63.69, -58.78) | | | -3.58 (-4.05, -3.12) |
| Montenegro | | | 8.45 (4.88, 38.19) | | -12.07 (-38.42, 24.12) | | 1.37 (0.79, 6.18) | | | -10.92 (-37.61, 25.76) | | 1.05 (0.60, 4.82) | | | -31.92 (-51.59, -5.38) | | | -1.41 (-1.6, -1.23) |
| Greece | | | 1495.12 (1339.78, 1644.78) | | 73.88 (56.87, 93.10) | | 14.69 (13.17, 16.17) | | | 77.54 (60.18, 97.17) | | 8.35 (7.67, 9.13) | | | 6.21 (-3.45, 16.75) | | | 0.09 (-0.35, 0.54) |
| Middle SDI |  | | |  | | | |  | | |  | | |  | | |  | |
| Ecuador | | | 957.09 (811.86, 1115.64) | | 0.32 (-25.93, 28.81) | | 5.30 (4.49, 6.18) | | | -44.59 (-59.09, -28.86) | | 5.80 (4.94, 6.74) | | | -39.3 (-54.11, -19.09) | | | -1.21 (-1.79, -0.62) |
| Peru | | | 1606.97 (1197.34, 2183.81) | | -35.83 (-60.21, 17.91) | | 4.43 (3.30, 6.02) | | | -61.72 (-76.26, -29.67) | | 4.65 (3.45, 6.29) | | | -56.02 (-71.37, -26.71) | | | -2.38 (-2.54, -2.22) |
| Philippines | | | 3530.66 (2583.73, 7427.35) | | 9.40 (-14.12, 44.09) | | 3.12 (2.28, 6.56) | | | -39.13 (-52.22, -19.83) | | 3.28 (2.37, 7.50) | | | -33.61 (-47.04, -14.31) | | | -1.04 (-1.24, -0.84) |
| South Africa | | | 1931.64 (1491.04, 2297.19) | | 25.02 (1.56, 55.44) | | 3.40 (2.62, 4.04) | | | -18.61 (-33.88, 1.19) | | 3.58 (2.77, 4.23) | | | -20.53 (-35.14, -2.85) | | | -0.52 (-0.75, -0.30) |
| Algeria | | | 4334.96 (2024.22, 6496.23) | | 29.42 (-58.02, 122.81) | | 9.81 (4.58, 14.70) | | | -25.95 (-75.98, 27.48) | | 11.09 (4.89, 16.62) | | | -10.1 (-67.98, 50.35) | | | 0.49 (0.15, 0.83) |
| Botswana | | | 85.68 (59.61, 114.39) | | 24.67 (-17.34, 83.07) | | 3.58 (2.49, 4.78) | | | -31.28 (-54.43, 0.92) | | 4.04 (2.86, 5.30) | | | -38.64 (-60.16, -8.43) | | | -1.51 (-1.62, -1.40) |
| Sri Lanka | | | 3523.42 (2180.3, 5135.34) | | 29.95 (-33.63, 122.86) | | 15.82 (9.79, 23.06) | | | -0.04 (-48.95, 71.43) | | 15.14 (9.48, 21.88) | | | -12.12 (-54.4, 48.75) | | | 0.37 (0, 0.73) |
| Thailand | | | 2148.57 (1424.85, 6094.36) | | 2.09 (-30.96, 50.30) | | 3.22 (2.14, 9.14) | | | -13.09 (-41.23, 27.94) | | 3.09 (2.13, 7.50) | | | -25.43 (-46.73, 6.98) | | | -1.2 (-1.42, -0.99) |
| Viet Nam | | | 3746.81 (2123.06, 8856.42) | | 14.66 (-26.56, 88.03) | | 3.74 (2.12, 8.83) | | | -21.98 (-50.02, 27.95) | | 3.80 (2.13, 9.56) | | | -29.47 (-53.9, 9.86) | | | -1.08 (-1.11, -1.06) |
| Colombia | | | 1644.89 (1380.16, 1948.75) | | -7.95 (-33.38, 20.66) | | 3.35 (2.81, 3.97) | | | -39.04 (-55.88, -20.09) | | 3.29 (2.74, 3.93) | | | -43.33 (-59.6, -25.25) | | | -1.89 (-2.27, -1.51) |
| Fiji | | | 43.77 (24.64, 83.14) | | 0.38 (-31.13, 39.45) | | 4.73 (2.67, 8.99) | | | -17.65 (-43.5, 14.39) | | 5.17 (2.93, 9.99) | | | -26.07 (-48.15, 2.34) | | | -1.06 (-1.13, -0.99) |
| Azerbaijan | | | 1871.05 (1077.75, 2999.05) | | 24.47 (-31.08, 121.24) | | 17.82 (10.26, 28.56) | | | -13.15 (-51.91, 54.37) | | 17.64 (10.69, 27.74) | | | -21.93 (-51.79, 28.74) | | | -1.37 (-1.54, -1.21) |
| Turkmenistan | | | 379.66 (289.51, 499.33) | | 93.26 (42.01, 168.82) | | 7.36 (5.61, 9.68) | | | 38.6 (1.84, 92.78) | | 7.85 (5.96, 10.27) | | | 24.5 (-9.77, 78.31) | | | 0.27 (-0.04, 0.58) |
| Nauru | | | 0.9 (0.52, 1.81) | | -3.41 (-30.06, 35.39) | | 8.21 (4.69, 16.40) | | | -10.58 (-35.26, 25.33) | | 10.3 (6.33, 22.74) | | | -3.51 (-31.6, 48.38) | | | -0.07 (-0.45, 0.32) |
| Uzbekistan | | | 3874.23 (3132.71, 4698.68) | | 19.54 (-7.81, 55.97) | | 11.32 (9.15, 13.73) | | | -26.81 (-43.56, -4.51) | | 12.2 (9.83, 14.82) | | | -28.79 (-46.16, -6.93) | | | -0.93 (-1.16, -0.71) |
| Iran (Islamic Republic of) | | | 12800.8 (9989.32, 14671.86) | | -54.5 (-70.44, -26.90) | | 15.0 (11.7, 17.19) | | | -69.56 (-80.23, -51.10) | | 16.26 (12.86, 18.66) | | | -68.06 (-76.09, -50.88) | | | -3.27 (-3.43, -3.11) |
| Albania | | | 286.53 (173, 512.06) | | -37.47 (-61.62, 30.89) | | 10.74 (6.48, 19.19) | | | -22.53 (-52.45, 62.16) | | 8.43 (5.32, 14.16) | | | -47.6 (-67.33, -4.42) | | | -1.96 (-2.13, -1.78) |
| Iraq | | | 1821.98 (992.54, 3157.54) | | -26.4 (-52.33, 26.54) | | 4.42 (2.41, 7.66) | | | -67.12 (-78.7, -43.46) | | 5.20 (2.84, 10.09) | | | -53.3 (-68.99, -25.19) | | | -2.47 (-2.56, -2.37) |
| Jamaica | | | 78.11 (60.29, 100.39) | | -66.08 (-75.04, -55.51) | | 2.79 (2.15, 3.59) | | | -71.34 (-78.91, -62.41) | | 2.81 (2.16, 3.62) | | | -70.94 (-78.59, -61.94) | | | -4.86 (-5.29, -4.42) |
| Tokelau | | | 0.16 (0.1, 0.37) | | 23.06 (-18.75, 96.03) | | 11.88 (7.14, 26.75) | | | 43.13 (-5.5, 128) | | 13.26 (8.10, 31.56) | | | 43.07 (-8.77, 128.49) | | | -0.75 (-1.43, -0.08) |
| Costa Rica | | | 163.56 (145.04, 182.93) | | -47.42 (-54.24, -39.69) | | 3.44 (3.05, 3.85) | | | -66.32 (-70.68, -61.37) | | 3.31 (2.92, 3.70) | | | -73.27 (-76.84, -69.40) | | | -5.12 (-5.67, -4.56) |
| Indonesia | | | 11946.7 (7868.41, 24908.03) | | 15.53 (-20.46, 73.11) | | 4.28 (2.82, 8.93) | | | -23.38 (-47.25, 14.81) | | 4.61 (3.03, 10.44) | | | -23.04 (-42.77, 10.44) | | | -0.89 (-0.99, -0.80) |
| Palestine | | | 212.16 (91.01, 499.79) | | -27.68 (-57.48, 29.05) | | 4.13 (1.77, 9.73) | | | -71.17 (-83.05, -48.56) | | 4.66 (1.98, 11.88) | | | -54.13 (-69.77, -29.27) | | | -2.1 (-2.29, -1.90) |
| Mexico | | | 3758.61 (3349.29, 4225.82) | | -22.01 (-38.78, -7.35) | | 2.91 (2.59, 3.27) | | | -48.48 (-59.56, -38.80) | | 3.11 (2.78, 3.53) | | | -44.31 (-55.3, -35.04) | | | -2.14 (-2.54, -1.73) |
| Cuba | | | 265.03 (227.52, 300.90) | | -45.2 (-54.22, -35.67) | | 2.35 (2.02, 2.67) | | | -47.26 (-55.93, -38.08) | | 1.90 (1.64, 2.14) | | | -59.43 (-66.17, -52.55) | | | -3.88 (-4.44, -3.32) |
| Panama | | | 88.67 (73.65, 104.21) | | -33.03 (-46.56, -17.21) | | 2.07 (1.72, 2.43) | | | -62.72 (-70.25, -53.92) | | 2.08 (1.73, 2.46) | | | -66.78 (-73.58, -58.51) | | | -4.48 (-5.08, -3.89) |
| Dominican Republic | | | 456.34 (329.64, 831.99) | | -45.79 (-66.19, 19.25) | | 4.14 (2.99, 7.55) | | | -64.8 (-78.05, -22.57) | | 4.26 (3.05, 7.94) | | | -56.09 (-71.48, -17.70) | | | -3.07 (-3.32, -2.82) |
| Saint Lucia | | | 16.12 (13.19, 19.49) | | -53.33 (-63.46, -42.73) | | 9.08 (7.43, 10.98) | | | -64.1 (-71.89, -55.94) | | 8.36 (6.78, 10.22) | | | -70.62 (-76.94, -63.71) | | | -5.07 (-5.58, -4.55) |
| Grenada | | | 9.28 (8.01, 10.66) | | -67.02 (-73.64, -60.24) | | 9.04 (7.81, 10.39) | | | -72.04 (-77.65, -66.29) | | 8.80 (7.66, 10.03) | | | -73.23 (-78.23, -67.62) | | | -5.02 (-5.52, -4.51) |
| Guyana | | | 119.1 (90.63, 157.23) | | 51.39 (11.39, 99.94) | | 15.57 (11.85, 20.56) | | | 54.34 (13.57, 103.84) | | 16.06 (12.29, 21.11) | | | 85.4 (37.93, 142.25) | | | -0.28 (-2.02, 1.49) |
| Brazil | | | 24078.22 (22849.84, 25249.19) | | 27.11 (17, 38.08) | | 10.93 (10.37, 11.46) | | | -14.33 (-21.15, -6.94) | | 10.45 (9.88, 11.02) | | | -27.98 (-33.61, -22.20) | | | -1.13 (-1.66, -0.59) |
| Paraguay | | | 156.73 (102.9, 384.23) | | 28.1 (-11.19, 81.80) | | 2.19 (1.44, 5.36) | | | -27.76 (-49.92, 2.52) | | 2.42 (1.58, 6.14) | | | -24.11 (-45.77, 4.67) | | | -0.74 (-0.88, -0.60) |
| Maldives | | | 33.7 (26.57, 49.80) | | -38.83 (-61.47, 51.31) | | 6.52 (5.14, 9.63) | | | -73.71 (-83.44, -34.98) | | 7.48 (5.98, 10.28) | | | -66.08 (-77.56, -42.35) | | | -3.44 (-3.5, -3.38) |
| Saint Vincent and the Grenadines | | | 2.81 (2.44, 3.27) | | -39.05 (-49.58, -25.04) | | 2.46 (2.14, 2.87) | | | -41.49 (-51.61, -28.05) | | 2.45 (2.08, 2.88) | | | -43.13 (-53.15, -30.18) | | | -3.65 (-4.63, -2.65) |
| Syrian Arab Republic | | | 283.9 (132.91, 1389.63) | | -61.19 (-83.3, -30.51) | | 2.02 (0.95, 9.90) | | | -64.82 (-84.87, -37.02) | | 2.32 (1.05, 11.57) | | | -48.91 (-75.97, -13.93) | | | -2.23 (-2.71, -1.75) |
| Suriname | | | 78.75 (58.49, 109.37) | | -44.76 (-61.35, 21.74) | | 13.59 (10.1, 18.88) | | | -63.12 (-74.2, -18.73) | | 14.26 (10.62, 19.62) | | | -61.21 (-72.54, -21.53) | | | -3.62 (-3.9, -3.34) |
| Tunisia | | | 1063.53 (438.06, 1720.93) | | 18.02 (-63.7, 132.67) | | 8.98 (3.7, 14.53) | | | -16.79 (-74.41, 64.04) | | 9.23 (3.88, 14.80) | | | -12.63 (-69.81, 67.51) | | | 0.17 (-0.13, 0.46) |
| Tonga | | | 4.37 (2.88, 9.01) | | -14.81 (-42.7, 23.68) | | 4.11 (2.71, 8.47) | | | -20.78 (-46.71, 15.02) | | 4.46 (2.97, 9.33) | | | -27.04 (-50.06, 2.44) | | | -0.95 (-1.02, -0.88) |
| Equatorial Guinea | | | 43.17 (24.27, 74.66) | | 4.53 (-39.27, 122.20) | | 2.85 (1.61, 4.94) | | | -70.78 (-83.02, -37.88) | | 3.83 (2.13, 6.65) | | | -59.57 (-75.41, -28) | | | -3.34 (-3.54, -3.15) |
| Gabon | | | 60.12 (34, 104.16) | | -0.91 (-36.35, 57.13) | | 3.31 (1.87, 5.74) | | | -46.33 (-65.53, -14.91) | | 4.14 (2.32, 7.11) | | | -40.72 (-58.42, -11.18) | | | -1.56 (-1.68, -1.44) |
| Armenia | | | 80.7 (67.24, 94.18) | | -68.46 (-75.71, -61) | | 2.69 (2.24, 3.14) | | | -63.98 (-72.26, -55.46) | | 2.18 (1.82, 2.53) | | | -73.18 (-79.22, -66.59) | | | -5.26 (-6.07, -4.45) |
| Low Middle SDI | |  | | | |  | | |  | | | |  | | |  | | |
| Tuvalu | | | 0.83 (0.54, 1.59) | | -30.35 (-50.64, 6.87) | | 6.75 (4.38, 12.89) | | | -46.43 (-62.03, -17.80) | | 7.30 (4.76, 14.38) | | | -41.7 (-57.89, -13.18) | | | -1.72 (-1.76, -1.68) |
| Lesotho | | | 87.02 (58.84, 115.73) | | 39.58 (-15.71, 118.02) | | 4.64 (3.14, 6.17) | | | 14.13 (-31.08, 78.26) | | 5.40 (3.74, 7.19) | | | 9.51 (-36.85, 76.47) | | | 0.8 (0.49, 1.10) |
| Mauritania | | | 176.76 (101.28, 300.06) | | 30.23 (-13.82, 104.41) | | 4.02 (2.30, 6.83) | | | -39.14 (-59.72, -4.47) | | 4.73 (2.40, 8.52) | | | -31.53 (-50.23, 0.10) | | | -1.27 (-1.38, -1.16) |
| Bangladesh | | | 12634.18 (7166.87, 19513.79) | | -4.93 (-48.62, 56.97) | | 7.67 (4.35, 11.85) | | | -36.99 (-65.95, 4.04) | | 8.66 (4.81, 13.69) | | | -34.81 (-53.62, -1.93) | | | -1.21 (-1.35, -1.07) |
| Namibia | | | 99.18 (67.19, 140.65) | | 49.83 (0.44, 123.36) | | 4.08 (2.76, 5.79) | | | -13.47 (-41.99, 28.99) | | 4.86 (3.36, 6.76) | | | -17.5 (-43.5, 20.64) | | | -0.62 (-0.72, -0.52) |
| Bhutan | | | 61.13 (33.9, 96.76) | | -33.48 (-63.77, 40.56) | | 8.08 (4.48, 12.78) | | | -44.63 (-69.84, 17) | | 9.27 (5.13, 14.22) | | | -35.09 (-58.87, 7.06) | | | -1.64 (-1.79, -1.50) |
| Nigeria | | | 15080.7 (10536.54, 21577.96) | | 59.63 (2.73, 134.62) | | 6.52 (4.56, 9.33) | | | -37.82 (-59.99, -8.61) | | 6.04 (4.07, 8.84) | | | -35.5 (-56, -5.93) | | | -1.49 (-1.66, -1.31) |
| India | | | 94736.65 (69016.87, 131902.05) | | -4.86 (-28.68, 40.91) | | 6.70 (4.88, 9.33) | | | -42.62 (-56.99, -15.02) | | 7.75 (5.52, 11.36) | | | -33.94 (-48.12, -9.88) | | | -1.16 (-1.24, -1.07) |
| Comoros | | | 41.28 (22.71, 80.71) | | -33.68 (-58.85, 10.41) | | 5.55 (3.05, 10.84) | | | -58.79 (-74.43, -31.39) | | 5.92 (3.15, 11.42) | | | -49.56 (-64.77, -22.60) | | | -2.48 (-2.78, -2.18) |
| Eswatini | | | 52.91 (35.42, 73.28) | | 20.43 (-24.91, 87.69) | | 4.58 (3.07, 6.34) | | | -15.94 (-47.58, 31.01) | | 5.30 (3.57, 7.29) | | | -21.62 (-51.9, 21.89) | | | -0.45 (-0.72, -0.18) |
| Sao Tome and Principe | | | 7.75 (3.3, 15.46) | | -11.22 (-55.84, 60.58) | | 3.58 (1.52, 7.14) | | | -50.29 (-75.27, -10.10) | | 4.36 (1.85, 8.40) | | | -33.58 (-57.92, 4.73) | | | -1.25 (-1.41, -1.08) |
| Kyrgyzstan | | | 105.35 (86.13, 130.93) | | -23.57 (-42.69, 2.37) | | 1.54 (1.26, 1.91) | | | -50.29 (-62.72, -33.42) | | 1.76 (1.46, 2.16) | | | -49.31 (-61.77, -33.06) | | | -2.64 (-3.09, -2.19) |
| Zimbabwe | | | 955.43 (595.2, 1431.59) | | 137.96 (50.1, 283.33) | | 6.13 (3.82, 9.18) | | | 57.81 (-0.45, 154.22) | | 7.16 (4.65, 10.44) | | | 37.21 (-11.58, 122.76) | | | 1.45 (1.05, 1.86) |
| Pakistan | | | 26574 (16921.27, 38115.28) | | 34.85 (-3.1, 90.77) | | 11.28 (7.18, 16.18) | | | -36.38 (-54.29, -10) | | 11.96 (7.86, 18.26) | | | -17.02 (-37.98, 12.04) | | | -0.3 (-0.41, -0.19) |
| Mongolia | | | 1230.35 (721.47, 1613.71) | | 53.56 (1.23, 136.50) | | 36.88 (21.62, 48.37) | | | -0.68 (-34.53, 52.96) | | 43.92 (25.6, 56.54) | | | -13.39 (-42.97, 37.10) | | | -0.52 (-0.65, -0.38) |
| Belize | | | 22.31 (19.51, 25.15) | | -56.29 (-64.09, -47.93) | | 5.20 (4.55, 5.86) | | | -80.96 (-84.36, -77.31) | | 5.72 (5.03, 6.45) | | | -75.56 (-79.37, -71.63) | | | -5.38 (-5.92, -4.84) |
| Tajikistan | | | 2491.46 (1593.07, 3452.28) | | 30.04 (-8.99, 99.93) | | 24.52 (15.68, 33.98) | | | -31.28 (-51.91, 5.65) | | 27.43 (17.75, 37.43) | | | -30.91 (-51.97, 2.20) | | | -1.54 (-1.69, -1.40) |
| Kiribati | | | 8.31 (4.89, 16.07) | | 26.44 (-5.45, 76.19) | | 6.86 (4.03, 13.26) | | | -22.35 (-41.94, 8.20) | | 8.09 (4.85, 15.83) | | | -17.63 (-37.58, 12.19) | | | -0.68 (-0.73, -0.62) |
| Djibouti | | | 62.6 (30.49, 119.10) | | 60.64 (-11.59, 203.49) | | 4.97 (2.42, 9.46) | | | -47.13 (-70.9, -0.12) | | 5.68 (2.66, 10.81) | | | -38.95 (-60.57, 0.57) | | | -1.77 (-1.94, -1.59) |
| Democratic People's Republic of Korea | | | 2284.97 (1613.35, 3818.22) | | 53.16 (7.23, 122.64) | | 8.66 (6.11, 14.47) | | | 19.5 (-16.34, 73.71) | | 8.04 (5.73, 13.40) | | | -5.03 (-34.23, 36) | | | 0.06 (-0.11, 0.23) |
| Egypt | | | 17675.58 (13635.22, 23380.86) | | -69.84 (-81.26, -31.11) | | 16.73 (12.91, 22.14) | | | -84.2 (-90.18, -63.91) | | 16.51 (12.82, 21.87) | | | -77.75 (-85.87, -53.73) | | | -4.71 (-4.87, -4.55) |
| Cameroon | | | 1814.22 (1238, 2862.20) | | 114.44 (49.16, 219.33) | | 5.71 (3.90, 9.01) | | | -29.57 (-51.01, 4.87) | | 6.27 (3.78, 10.57) | | | -25.17 (-46.81, 11.70) | | | -0.74 (-0.97, -0.50) |
| Cabo Verde | | | 22.38 (8.83, 41.02) | | -33.17 (-56.1, 13.25) | | 4.00 (1.58, 7.33) | | | -57.72 (-72.23, -28.35) | | 4.41 (1.75, 8.30) | | | -48.93 (-64.28, -17.22) | | | -2.43 (-2.55, -2.32) |
| Kenya | | | 1654.78 (819.9, 3203.83) | | 42.17 (-2.27, 109.77) | | 3.31 (1.64, 6.40) | | | -34.27 (-54.81, -3.01) | | 4.05 (1.93, 7.82) | | | -22.44 (-38.01, 9.41) | | | -0.57 (-0.7, -0.44) |
| Congo | | | 205.55 (130.67, 368.56) | | 18.81 (-20.56, 89.43) | | 3.81 (2.42, 6.84) | | | -47.08 (-64.61, -15.62) | | 4.80 (2.93, 8.78) | | | -39.24 (-54.6, -15.53) | | | -1.72 (-1.84, -1.60) |
| Sudan | | | 7551.16 (3740.14, 11346.37) | | 44.84 (-46.46, 190.12) | | 17.39 (8.61, 26.13) | | | -33.21 (-75.31, 33.78) | | 17.35 (8.60, 25.58) | | | -4.9 (-63.69, 71.26) | | | 0.61 (0.17, 1.05) |
| Ghana | | | 1256.2 (806.24, 2061.56) | | 17.85 (-15.52, 78.22) | | 3.67 (2.35, 6.02) | | | -48.48 (-63.07, -22.09) | | 4.49 (2.65, 7.35) | | | -43.95 (-61.9, -15.73) | | | -1.94 (-2.06, -1.81) |
| Cambodia | | | 776.58 (499.93, 1512.88) | | 7.5 (-41.61, 97.21) | | 4.56 (2.93, 8.88) | | | -35.2 (-64.81, 18.86) | | 4.92 (3.12, 10.08) | | | -26.09 (-54.22, 22.14) | | | -1.1 (-1.16, -1.04) |
| Morocco | | | 4558.95 (2226.46, 6953.34) | | -2.28 (-68.25, 70.78) | | 12.26 (5.99, 18.70) | | | -33.35 (-78.34, 16.48) | | 13.46 (6.51, 20.47) | | | -13.7 (-69.39, 45.33) | | | 0.19 (-0.18, 0.56) |
| El Salvador | | | 262.84 (190.2, 440.54) | | -61.2 (-75.77, -16.83) | | 4.07 (2.95, 6.83) | | | -68.09 (-80.07, -31.59) | | 4.18 (3.02, 6.98) | | | -64.86 (-77.21, -31.58) | | | -3.9 (-4.14, -3.67) |
| Lao People's Democratic Republic | | | 479.37 (256.03, 980.48) | | 0.15 (-39.44, 97.44) | | 6.50 (3.47, 13.29) | | | -43.4 (-65.78, 11.59) | | 6.65 (3.69, 13.98) | | | -33.23 (-55.88, 13.79) | | | -1.4 (-1.49, -1.31) |
| Guatemala | | | 324.33 (275.5, 385.54) | | -62.43 (-72.02, -53.37) | | 2.06 (1.75, 2.45) | | | -80.02 (-85.12, -75.21) | | 2.36 (2.02, 2.80) | | | -74.82 (-80.85, -68.74) | | | -5.45 (-5.96, -4.94) |
| Honduras | | | 408.61 (282.58, 617.02) | | 20.74 (-14.14, 92.39) | | 4.04 (2.79, 6.10) | | | -43.75 (-60, -10.37) | | 5.30 (3.67, 8.02) | | | -34.92 (-54.79, -9.14) | | | -1.52 (-1.64, -1.41) |
| Nicaragua | | | 102.47 (68.95, 301.79) | | -63.23 (-80.03, 8.94) | | 1.54 (1.03, 4.53) | | | -78.57 (-88.36, -36.50) | | 1.76 (1.18, 5.35) | | | -71.34 (-82.77, -30.60) | | | -4.46 (-4.69, -4.24) |
| Venezuela (Bolivarian Republic of) | | | 491.58 (391.39, 609.33) | | -35.22 (-49.99, -16.85) | | 1.85 (1.47, 2.29) | | | -54.25 (-64.68, -41.27) | | 1.83 (1.46, 2.27) | | | -56.9 (-66.59, -45.52) | | | -3.71 (-4.22, -3.19) |
| Zambia | | | 1342.55 (566.65, 2580.89) | | 74.06 (-28.55, 258.44) | | 6.88 (2.90, 13.22) | | | -29.21 (-70.94, 45.77) | | 8.64 (3.22, 17.19) | | | -6.12 (-57.54, 64.80) | | | 0.09 (-0.09, 0.27) |
| Marshall Islands | | | 3.94 (2.27, 7.49) | | 17.14 (-25.05, 70.56) | | 6.99 (4.04, 13.32) | | | -5.44 (-39.49, 37.69) | | 8.04 (4.72, 15.81) | | | -22.71 (-46.9, 7.85) | | | -0.85 (-0.98, -0.73) |
| Micronesia (Federated States of) | | | 6.57 (4.01, 12.52) | | -24.16 (-46.12, 8.75) | | 6.41 (3.91, 12.20) | | | -23.49 (-45.64, 9.71) | | 7.48 (4.69, 15.03) | | | -31.04 (-50.92, -1.62) | | | -1.2 (-1.25, -1.14) |
| Samoa | | | 12.36 (8.35, 23.27) | | 3.34 (-19.34, 31.68) | | 5.79 (3.91, 10.89) | | | -18.29 (-36.22, 4.12) | | 6.56 (4.40, 12.94) | | | -24.07 (-41.18, -2.54) | | | -0.81 (-0.87, -0.76) |
| Bolivia (Plurinational State of) | | | 979.69 (707.6, 1392.20) | | -38.42 (-60.8, 12.52) | | 8.30 (6.00, 11.80) | | | -66.69 (-78.8, -39.14) | | 9.02 (6.57, 12.82) | | | -53.71 (-69.32, -23.31) | | | -2.52 (-2.59, -2.45) |
| Myanmar | | | 3636.27 (2377.29, 7103.61) | | -12.14 (-43.88, 56.40) | | 6.45 (4.21, 12.59) | | | -37.02 (-59.78, 12.10) | | 6.76 (4.43, 13.78) | | | -33.32 (-53.98, 9.36) | | | -1.54 (-1.71, -1.37) |
| Vanuatu | | | 21.52 (14.19, 41.20) | | 69.64 (17.6, 135.96) | | 6.87 (4.54, 13.16) | | | -17.49 (-42.8, 14.76) | | 7.80 (5.12, 15.18) | | | -16.59 (-39.55, 15.21) | | | -0.8 (-0.92, -0.67) |
| Low SDI |  | | |  | | | |  | | |  | | |  | | |  | |
| Yemen | | | 5974.8 (2916.76, 8720.97) | | 88.4 (-25.84, 211.45) | | 17.76 (8.67, 25.92) | | | -23.65 (-69.94, 26.22) | | 19.3 (9.07, 28.92) | | | 15.26 (-51.93, 81.97) | | | 1.04 (0.68, 1.41) |
| Mali | | | 1667.08 (917.76, 2937.56) | | 89.63 (24.61, 188.41) | | 6.92 (3.81, 12.19) | | | -31.85 (-55.22, 3.65) | | 6.95 (3.08, 13.92) | | | -22.76 (-46.02, 7.51) | | | -0.69 (-0.76, -0.62) |
| Afghanistan | | | 8110.07 (3767.65, 12130.89) | | 243.62 (49.31, 462.65) | | 25.98 (12.07, 38.85) | | | 9.43 (-52.45, 79.19) | | 25.28 (10.98, 39.03) | | | 38.97 (-43.32, 125.73) | | | 1.96 (1.55, 2.37) |
| Burundi | | | 916.19 (413.87, 1813.47) | | -6.62 (-51.66, 60.21) | | 6.93 (3.13, 13.72) | | | -60.77 (-79.69, -32.70) | | 7.64 (3.08, 15.11) | | | -51.03 (-73.85, -20.38) | | | -2.38 (-2.47, -2.29) |
| Niger | | | 1835.09 (768.47, 3526.14) | | 92.24 (-1, 231.14) | | 7.33 (3.07, 14.08) | | | -38.33 (-68.24, 6.23) | | 7.69 (2.46, 15.66) | | | -25.96 (-56.65, 9.64) | | | -0.94 (-1.03, -0.85) |
| Timor-Leste | | | 87.79 (51.93, 174) | | 15.77 (-30.74, 97.73) | | 6.28 (3.72, 12.45) | | | -35.3 (-61.29, 10.51) | | 6.29 (3.77, 13.06) | | | -21.51 (-45.43, 14.98) | | | -0.75 (-0.99, -0.51) |
| Nepal | | | 2556.76 (1464.97, 3967.16) | | -25.33 (-57.99, 33.59) | | 8.21 (4.71, 12.74) | | | -53.3 (-73.73, -16.45) | | 9.42 (5.15, 15.02) | | | -36.1 (-59.08, -5.69) | | | -1.4 (-1.42, -1.37) |
| Senegal | | | 904.41 (433.44, 1527.52) | | 10.24 (-38.03, 88.38) | | 5.70 (2.73, 9.63) | | | -46.95 (-70.18, -9.34) | | 6.40 (2.74, 11.21) | | | -34.76 (-56.36, -2.62) | | | -1.24 (-1.45, -1.04) |
| Sierra Leone | | | 774.42 (456.65, 1267.76) | | 20.19 (-29.4, 122.23) | | 8.73 (5.15, 14.30) | | | -43.73 (-66.95, 4.05) | | 8.24 (4.47, 13.62) | | | -28.95 (-53.32, 13.14) | | | -1.08 (-1.21, -0.95) |
| Benin | | | 779.93 (486.85, 1192.33) | | 76.49 (14.23, 196.77) | | 5.78 (3.61, 8.83) | | | -36.58 (-58.95, 6.64) | | 5.73 (2.98, 9.04) | | | -28.27 (-48.68, 5.65) | | | -0.87 (-1, -0.74) |
| Togo | | | 459.61 (236.88, 734.42) | | 50.85 (-9.32, 157.40) | | 5.49 (2.83, 8.77) | | | -34.29 (-60.5, 12.13) | | 6.36 (3.03, 10.38) | | | -24.09 (-46.99, 8.68) | | | -0.82 (-0.97, -0.67) |
| Eritrea | | | 469.8 (239.3, 930.61) | | 2.2 (-35.33, 63.75) | | 7.12 (3.63, 14.10) | | | -47.24 (-66.62, -15.47) | | 8.01 (3.80, 15.23) | | | -38.82 (-57.32, -8.80) | | | -1.62 (-1.75, -1.50) |
| South Sudan | | | 1105.76 (627.72, 2079.55) | | 13.58 (-28.77, 107.26) | | 11.43 (6.49, 21.50) | | | -30.98 (-56.72, 25.94) | | 10.34 (5.26, 18.60) | | | -25.49 (-50.74, 21.49) | | | -0.98 (-1.41, -0.55) |
| Burkina Faso | | | 1991.59 (1161.79, 3180.60) | | 74.44 (18.1, 165.95) | | 8.75 (5.1, 13.97) | | | -26.98 (-50.56, 11.33) | | 8.98 (4.20, 14.92) | | | -19.42 (-41.29, 12.69) | | | -0.44 (-0.54, -0.34) |
| Angola | | | 1628.07 (975.69, 2923.79) | | 45.36 (-19.27, 173.57) | | 4.98 (2.98, 8.94) | | | -54.33 (-74.64, -14.05) | | 6.21 (3.27, 11.56) | | | -38.77 (-60.65, -2.57) | | | -1.55 (-1.66, -1.44) |
| Ethiopia | | | 5398.47 (2500.38, 11568.87) | | -4.67 (-42.95, 59.16) | | 4.96 (2.30, 10.62) | | | -55.75 (-73.52, -26.12) | | 5.53 (2.30, 11.22) | | | -48.78 (-65.21, -22.99) | | | -2.53 (-2.66, -2.41) |
| Central African Republic | | | 429.11 (231.83, 780.06) | | 32.41 (-17.93, 112.25) | | 7.82 (4.23, 14.22) | | | -34.07 (-59.14, 5.68) | | 8.92 (4.34, 15.95) | | | -21.52 (-44.26, 9.36) | | | -0.73 (-0.78, -0.69) |
| Chad | | | 1766.39 (980.12, 3155.62) | | 165.88 (86.01, 314.41) | | 9.95 (5.52, 17.78) | | | -9.73 (-36.84, 40.71) | | 9.18 (4.46, 16.36) | | | -3.24 (-30.7, 39.83) | | | -0.02 (-0.17, 0.14) |
| Cote d'Ivoire | | | 1818.26 (1113.87, 2742.29) | | 63.25 (10.87, 162.60) | | 6.53 (4.00, 9.84) | | | -28.53 (-51.46, 14.97) | | 6.79 (3.56, 10.99) | | | -24.2 (-45.57, 12.22) | | | -0.7 (-0.83, -0.56) |
| Gambia | | | 134.09 (70.03, 241.32) | | 69.56 (13.9, 143.32) | | 5.60 (2.92, 10.08) | | | -30.48 (-53.3, -0.24) | | 6.52 (3.06, 11.69) | | | -21.96 (-44.17, 10.01) | | | -0.9 (-1.09, -0.72) |
| Madagascar | | | 3453.94 (1961.4, 6744.70) | | 44.44 (-4.19, 111.44) | | 12.09 (6.87, 23.62) | | | -39.81 (-60.07, -11.89) | | 12.8 (6.85, 24.47) | | | -29.04 (-48.3, -5.64) | | | -1 (-1.06, -0.94) |
| Malawi | | | 1045.55 (545.99, 1827.17) | | -10.22 (-49.87, 54.80) | | 5.38 (2.81, 9.40) | | | -54.73 (-74.73, -21.95) | | 6.17 (3.08, 10.65) | | | -34.94 (-55.87, -6.03) | | | -1.47 (-1.63, -1.32) |
| Guinea | | | 1089.58 (641.51, 1802.89) | | 40.93 (-14.22, 164.11) | | 8.11 (4.78, 13.42) | | | -37.1 (-61.71, 17.88) | | 8.02 (3.99, 13.76) | | | -21.89 (-49.21, 26.86) | | | -0.53 (-0.7, -0.37) |
| Guinea-Bissau | | | 152.94 (84.96, 260.81) | | 21.32 (-24.18, 99.40) | | 7.41 (4.12, 12.64) | | | -40.8 (-63, -2.70) | | 8.52 (4.19, 14.99) | | | -30.39 (-50.01, -3.16) | | | -1.02 (-1.17, -0.88) |
| Liberia | | | 339.24 (172.73, 574.71) | | -4.03 (-52.84, 94.70) | | 6.21 (3.16, 10.53) | | | -56.75 (-78.74, -12.25) | | 6.94 (3.10, 12.33) | | | -39.48 (-65.26, 0.58) | | | -1.51 (-1.67, -1.34) |
| Mozambique | | | 2156.89 (1087.08, 3608.29) | | 37.11 (-20.58, 139.74) | | 6.94 (3.50, 11.61) | | | -41.05 (-65.85, 3.08) | | 8.59 (3.81, 15.15) | | | -20.32 (-45.12, 19.65) | | | -0.35 (-0.51, -0.20) |
| Rwanda | | | 725.39 (355.63, 1528.51) | | -36.93 (-66.83, 18.71) | | 5.47 (2.68, 11.52) | | | -65.83 (-82.03, -35.68) | | 6.17 (2.87, 13.12) | | | -58.59 (-76.13, -31.31) | | | -3.62 (-3.89, -3.35) |
| Uganda | | | 2530.95 (1529.46, 4433.19) | | 0.51 (-31.29, 56.46) | | 5.84 (3.53, 10.23) | | | -59.88 (-72.57, -37.54) | | 5.98 (3.20, 10.36) | | | -48.95 (-67.11, -19.90) | | | -2.51 (-2.66, -2.36) |
| Somalia | | | 2163.18 (667.22, 4512.51) | | 62.85 (-16.9, 152.36) | | 10.01 (3.09, 20.88) | | | -40.17 (-69.47, -7.28) | | 10.58 (2.79, 22.97) | | | -30.5 (-61.07, 2.16) | | | -1.09 (-1.21, -0.96) |
| Solomon Islands | | | 33.63 (22.54, 58.79) | | 60.86 (9.31, 127.36) | | 4.92 (3.30, 8.60) | | | -20.21 (-45.78, 12.78) | | 6.31 (4.18, 11.93) | | | -17.43 (-41.24, 20.96) | | | -0.57 (-0.64, -0.50) |
| Haiti | | | 3454.06 (1446.46, 6073.08) | | -11.95 (-41.07, 49.58) | | 26.85 (11.24, 47.21) | | | -56.33 (-70.77, -25.81) | | 25.17 (11.87, 42.29) | | | -44.74 (-61.36, -18.62) | | | -1.87 (-2, -1.75) |
| Papua New Guinea | | | 1243.25 (832.13, 2019.84) | | 133.18 (66.47, 233.82) | | 11.88 (7.95, 19.31) | | | -8.54 (-34.71, 30.93) | | 11.31 (7.43, 19.45) | | | -8.41 (-31.49, 25.19) | | | -0.29 (-0.34, -0.23) |
| United Republic of Tanzania | | | 3514.28 (2011.8, 6433.38) | | 21.52 (-22.26, 89.57) | | 6.01 (3.44, 11.01) | | | -46.28 (-65.63, -16.20) | | 6.27 (3.28, 11.36) | | | -38.69 (-55.69, -13.96) | | | -1.57 (-1.65, -1.49) |
| Democratic Republic of the Congo | | | 4157.99 (2013.45, 7024.16) | | 13.97 (-44.43, 96.71) | | 4.62 (2.24, 7.80) | | | -51.7 (-76.45, -16.64) | | 6.13 (2.66, 11.34) | | | -29.95 (-57.9, -0.76) | | | -0.99 (-1.1, -0.88) |

⁎Parentheses for all GBD health estimate indicate 95% uncertainty intervals.

**Abbreviation:** ASR, age-standardized rates; EAPC, estimated annual percentage change; GBD, Global Burden of Diseases; PAH, pulmonary arterial hypertension; SDI, Socio-demographic Index.

**Table S6.** The temporal change of deaths from PAH by SDI quintiles in 204 countries and territories during 1990-2021.

| Location | | | Number* in 2021 | | Percent change of cases, 1990–2021, % | | All-age rate in 2021, per 100,000 | | | Percent change of all-age rate, 1990–2021, % | | ASR in 2021, per 100,000 | | | Percent change of ASR, 1990–2021, % | | | EAPC |
| --- | --- | --- | --- | --- | --- | --- | --- | --- | --- | --- | --- | --- | --- | --- | --- | --- | --- | --- |
| High SDI |  | | |  | | | |  | | |  | | |  | | |  | |
| Luxembourg | | | 2.31 (1.97, 2.60) | | 72.45 (49.74, 99.20) | | 0.36 (0.31, 0.40) | | | 2.03 (-11.41, 17.85) | | 0.21 (0.18, 0.23) | | | -23.42 (-32.59, -13.12) | | | -1.05 (-1.77, -0.32) |
| Singapore | | | 5.99 (5.28, 6.63) | | 5.23 (-8.27, 18.08) | | 0.10 (0.09, 0.12) | | | -44.01 (-51.19, -37.17) | | 0.09 (0.08, 0.10) | | | -61.62 (-65.83, -57.07) | | | -2.71 (-3.17, -2.26) |
| Poland | | | 77.24 (69.35, 84.06) | | 11.93 (-6.08, 34.44) | | 0.20 (0.18, 0.22) | | | 11.74 (-6.24, 34.21) | | 0.12 (0.11, 0.13) | | | -27.45 (-38.78, -12.89) | | | -1.33 (-1.71, -0.95) |
| Netherlands | | | 47.8 (41.31, 53.33) | | 58.12 (40.93, 77.69) | | 0.28 (0.24, 0.31) | | | 37.09 (22.19, 54.06) | | 0.14 (0.12, 0.15) | | | -14.58 (-22.61, -4.97) | | | -0.87 (-1.75, 0.02) |
| Australia | | | 50.1 (42.14, 56.89) | | 24.47 (-6.81, 50.40) | | 0.19 (0.16, 0.22) | | | -18.64 (-39.09, -1.69) | | 0.12 (0.10, 0.13) | | | -48.12 (-60.72, -37.85) | | | -2.2 (-2.58, -1.82) |
| United States Virgin Islands | | | 0.2 (0.14, 0.36) | | -45.95 (-65.28, -4.38) | | 0.24 (0.16, 0.42) | | | -33.26 (-57.14, 18.06) | | 0.16 (0.11, 0.26) | | | -61.65 (-73.98, -41.71) | | | -3.14 (-3.45, -2.82) |
| Bermuda | | | 0.74 (0.62, 0.91) | | -28.41 (-43.33, -9.92) | | 1.17 (0.98, 1.43) | | | -33.09 (-47.04, -15.81) | | 0.57 (0.48, 0.69) | | | -67.08 (-73.73, -58.45) | | | -4.71 (-5.25, -4.16) |
| Norway | | | 4.77 (4.24, 5.20) | | -34.45 (-39.69, -29.77) | | 0.09 (0.08, 0.10) | | | -48.63 (-52.74, -44.96) | | 0.05 (0.05, 0.05) | | | -64.02 (-66.5, -61.49) | | | -4.24 (-5.55, -2.92) |
| New Zealand | | | 7.61 (6.67, 8.48) | | 45.67 (28.48, 64.09) | | 0.15 (0.13, 0.16) | | | -3.7 (-15.07, 8.47) | | 0.10 (0.09, 0.11) | | | -27.51 (-35.55, -18.31) | | | -1.27 (-2.08, -0.45) |
| Sweden | | | 25.84 (21.97, 28.92) | | 48.06 (29.18, 65.86) | | 0.25 (0.21, 0.28) | | | 22.57 (6.94, 37.31) | | 0.12 (0.11, 0.14) | | | -13.08 (-22.7, -2.87) | | | -0.65 (-1.13, -0.18) |
| Andorra | | | 0.17 (0.11, 0.27) | | 38.57 (-12.24, 119.13) | | 0.2 (0.13, 0.31) | | | -11.99 (-44.26, 39.17) | | 0.11 (0.07, 0.17) | | | -53.67 (-69.55, -28.33) | | | -2.42 (-2.62, -2.23) |
| Switzerland | | | 37.4 (30.5, 42.49) | | 6.32 (-16.4, 28.28) | | 0.42 (0.34, 0.48) | | | -18.19 (-35.66, -1.28) | | 0.19 (0.16, 0.21) | | | -48.5 (-59.27, -38.92) | | | -2.31 (-2.7, -1.91) |
| Estonia | | | 1.12 (0.92, 1.31) | | 190.04 (134.87, 254.14) | | 0.09 (0.07, 0.10) | | | 247.05 (181.03, 323.75) | | 0.04 (0.03, 0.04) | | | 70.66 (39.99, 105.76) | | | 2.78 (1.03, 4.56) |
| Austria | | | 24.91 (21.77, 27.61) | | 24.87 (11.5, 37.69) | | 0.28 (0.24, 0.31) | | | 7.99 (-3.57, 19.08) | | 0.13 (0.12, 0.14) | | | -27.29 (-34.04, -20.21) | | | -0.81 (-1.5, -0.12) |
| Belgium | | | 44.98 (37.75, 50.32) | | 1.89 (-19.73, 19.17) | | 0.39 (0.33, 0.44) | | | -11.35 (-30.16, 3.68) | | 0.18 (0.16, 0.20) | | | -41.46 (-54.13, -32.83) | | | -1.67 (-1.99, -1.35) |
| Georgia | | | 58.04 (45.46, 72.63) | | 174.69 (95.31, 283.48) | | 1.61 (1.26, 2.01) | | | 320.57 (199.03, 487.13) | | 1.01 (0.79, 1.27) | | | 171.97 (94.17, 280.56) | | | 4.74 (3.9, 5.58) |
| Greenland | | | 0.1 (0.08, 0.16) | | -63.73 (-77.29, -3.66) | | 0.19 (0.14, 0.29) | | | -64.08 (-77.51, -4.59) | | 0.19 (0.15, 0.30) | | | -75.14 (-84, -38.13) | | | -5.24 (-5.55, -4.93) |
| Slovakia | | | 5.61 (3.48, 11.40) | | -5.89 (-34.88, 40.94) | | 0.1 (0.06, 0.21) | | | -8.42 (-36.63, 37.14) | | 0.06 (0.04, 0.13) | | | -38.56 (-57.14, -6.98) | | | -1.37 (-1.64, -1.10) |
| United Kingdom | | | 118.93 (106.7, 125.68) | | 11.87 (-10.8, 23.60) | | 0.18 (0.16, 0.19) | | | -5.53 (-24.67, 4.38) | | 0.10 (0.1, 0.11) | | | -28.6 (-42.62, -20.45) | | | -0.92 (-1.01, -0.84) |
| Kuwait | | | 3.95 (3.36, 4.65) | | 330.5 (250.49, 422.90) | | 0.09 (0.07, 0.10) | | | 59.1 (29.53, 93.25) | | 0.14 (0.12, 0.16) | | | 90.64 (58.65, 128.20) | | | 3.62 (2.01, 5.25) |
| Monaco | | | 0.14 (0.09, 0.21) | | 23.24 (-15.49, 80.42) | | 0.38 (0.25, 0.55) | | | -1.01 (-32.12, 44.92) | | 0.15 (0.10, 0.21) | | | -16.29 (-43.22, 23.26) | | | -0.62 (-0.82, -0.41) |
| Slovenia | | | 1.78 (1.49, 2.07) | | 98.17 (60.98, 139.90) | | 0.09 (0.07, 0.10) | | | 88.97 (53.51, 128.76) | | 0.04 (0.03, 0.04) | | | -0.65 (-19.92, 20.77) | | | -0.06 (-0.32, 0.20) |
| Latvia | | | 4.18 (3.54, 4.81) | | 486.38 (371.74, 608.50) | | 0.22 (0.19, 0.26) | | | 733.36 (570.44, 906.91) | | 0.10 (0.09, 0.12) | | | 351.92 (265.34, 442.08) | | | 5.63 (3.48, 7.82) |
| San Marino | | | 0.04 (0.03, 0.11) | | 25.5 (-18.72, 89.01) | | 0.14 (0.08, 0.34) | | | -8.95 (-41.03, 37.13) | | 0.05 (0.03, 0.12) | | | -50.88 (-68.87, -26.33) | | | -1.34 (-1.67, -1.01) |
| Taiwan (Province of China) | | | 76.8 (65.75, 84.87) | | 509.68 (430.18, 579.46) | | 0.32 (0.28, 0.36) | | | 425.96 (357.38, 486.16) | | 0.18 (0.16, 0.20) | | | 92.64 (71.38, 114.17) | | | 5.4 (3.99, 6.83) |
| Qatar | | | 1.29 (0.65, 2.07) | | 355.97 (65.59, 685.98) | | 0.04 (0.02, 0.07) | | | -31.87 (-75.26, 17.44) | | 0.13 (0.07, 0.19) | | | -21.78 (-68.68, 33.08) | | | -0.06 (-0.54, 0.43) |
| Lithuania | | | 4.5 (3.83, 5.18) | | 217.19 (157.93, 289.84) | | 0.16 (0.14, 0.19) | | | 327.17 (247.36, 425.01) | | 0.08 (0.07, 0.09) | | | 119.86 (82.46, 168.42) | | | 3.9 (2.08, 5.74) |
| Cyprus | | | 14.55 (7.31, 18.60) | | 11.58 (-17.85, 66.17) | | 1.07 (0.54, 1.37) | | | -36.06 (-52.93, -4.78) | | 0.80 (0.38, 1.02) | | | -61.5 (-70.96, -42.29) | | | -3.2 (-3.33, -3.08) |
| Iceland | | | 0.75 (0.62, 0.87) | | 71.47 (46.45, 98.84) | | 0.21 (0.18, 0.25) | | | 24.25 (6.12, 44.09) | | 0.13 (0.11, 0.15) | | | -17.31 (-28.33, -4.99) | | | -0.7 (-1.44, 0.04) |
| Saudi Arabia | | | 18.01 (9.19, 35.62) | | 24.55 (-35.75, 121.54) | | 0.05 (0.02, 0.09) | | | -47.62 (-72.98, -6.83) | | 0.08 (0.04, 0.20) | | | -42.02 (-71.21, 1.80) | | | -1.32 (-1.81, -0.83) |
| Japan | | | 1002.43 (785.83, 1147.27) | | 160.44 (115.71, 193.15) | | 0.79 (0.62, 0.90) | | | 156.63 (112.55, 188.86) | | 0.29 (0.25, 0.32) | | | -1.92 (-10.11, 5.64) | | | -0.26 (-0.42, -0.11) |
| Denmark | | | 20.96 (18.02, 23.13) | | 26.09 (10.83, 43.71) | | 0.36 (0.31, 0.40) | | | 10.83 (-2.58, 26.32) | | 0.18 (0.15, 0.19) | | | -24.34 (-32.42, -15.08) | | | -0.9 (-1.53, -0.26) |
| Republic of Korea | | | 39.43 (22, 136.24) | | -6.73 (-51.21, 92.85) | | 0.08 (0.04, 0.26) | | | -19.98 (-58.14, 65.45) | | 0.06 (0.03, 0.17) | | | -57.33 (-74.85, -27.36) | | | -2.67 (-2.72, -2.62) |
| Ireland | | | 8.4 (7.2, 9.47) | | 43.58 (25.81, 63.21) | | 0.17 (0.15, 0.19) | | | 4.66 (-8.29, 18.98) | | 0.11 (0.10, 0.12) | | | -27.6 (-35.4, -18.50) | | | -1.14 (-1.79, -0.50) |
| Czechia | | | 88.46 (75.73, 101.06) | | 74.14 (41.29, 108) | | 0.83 (0.71, 0.95) | | | 68.61 (36.79, 101.39) | | 0.43 (0.36, 0.49) | | | 8.68 (-12.27, 31.55) | | | 0.56 (0.3, 0.81) |
| United Arab Emirates | | | 9.66 (5.42, 12.45) | | 48.63 (-1.82, 139.07) | | 0.1 (0.06, 0.13) | | | -71.13 (-80.93, -53.56) | | 0.38 (0.20, 0.53) | | | -48.07 (-66.48, -16.14) | | | 0.25 (-0.57, 1.07) |
| Canada | | | 94.55 (82.7, 103.85) | | 1.8 (-8.71, 12.87) | | 0.25 (0.22, 0.28) | | | -25.96 (-33.6, -17.90) | | 0.14 (0.13, 0.15) | | | -54.2 (-58.48, -49.88) | | | -4.03 (-4.84, -3.21) |
| Puerto Rico | | | 6.06 (5.04, 7.15) | | -70.92 (-76.3, -64.89) | | 0.18 (0.15, 0.22) | | | -68.12 (-74.01, -61.50) | | 0.10 (0.08, 0.12) | | | -82.97 (-86.07, -79.43) | | | -6.64 (-7.02, -6.25) |
| Finland | | | 7.73 (6.54, 8.72) | | 34.68 (12.81, 62.44) | | 0.14 (0.12, 0.16) | | | 21.89 (2.09, 47) | | 0.06 (0.05, 0.07) | | | -29.77 (-40.09, -16.28) | | | -0.94 (-1.62, -0.26) |
| United States of America | | | 1785.1 (1535.37, 1944.86) | | 83.8 (63.79, 105.31) | | 0.54 (0.46, 0.58) | | | 40.4 (25.11, 56.83) | | 0.31 (0.27, 0.33) | | | -2.06 (-11.95, 8.32) | | | -0.1 (-0.21, 0) |
| France | | | 325.05 (279.45, 361.07) | | 35.98 (5.73, 74.16) | | 0.49 (0.42, 0.54) | | | 18.32 (-8, 51.55) | | 0.21 (0.19, 0.23) | | | -30.74 (-45.39, -12.77) | | | -1.12 (-1.39, -0.86) |
| Germany | | | 543.72 (452.64, 604.01) | | 78.72 (45.75, 122.22) | | 0.64 (0.53, 0.71) | | | 67.35 (36.48, 108.08) | | 0.26 (0.22, 0.28) | | | -4.87 (-20.19, 16.95) | | | 0.52 (-0.29, 1.34) |
| High Middle SDI | |  | | | |  | | |  | | | |  | | |  | | |
| American Samoa | | | 0.05 (0.03, 0.12) | | 29.38 (-12.24, 78.92) | | 0.11 (0.06, 0.23) | | | 26.11 (-14.45, 74.41) | | 0.13 (0.07, 0.28) | | | -25.54 (-46.31, 3.98) | | | -0.85 (-0.89, -0.82) |
| Malta | | | 0.77 (0.66, 0.87) | | 116.74 (87.8, 148.54) | | 0.17 (0.15, 0.20) | | | 81.63 (57.38, 108.28) | | 0.08 (0.07, 0.10) | | | -7.48 (-18.44, 4.83) | | | -0.57 (-1.29, 0.16) |
| Antigua and Barbuda | | | 0.04 (0.03, 0.04) | | -38.36 (-47.25, -28.72) | | 0.04 (0.04, 0.05) | | | -58.47 (-64.46, -51.98) | | 0.04 (0.04, 0.04) | | | -63.52 (-68.67, -58.05) | | | -4.25 (-4.75, -3.76) |
| Kazakhstan | | | 7.48 (6.09, 9.04) | | 25.62 (-9.34, 81.06) | | 0.04 (0.03, 0.05) | | | 8.64 (-21.6, 56.58) | | 0.05 (0.04, 0.06) | | | 5.84 (-24.65, 57.31) | | | -0.23 (-0.42, -0.03) |
| Romania | | | 170.1 (145.82, 194.90) | | 42.15 (12.44, 87.95) | | 0.90 (0.77, 1.03) | | | 75.49 (38.8, 132.03) | | 0.49 (0.42, 0.55) | | | 1.55 (-19.26, 32.57) | | | -0.36 (-0.67, -0.05) |
| Portugal | | | 56.06 (47.71, 63.05) | | 99.24 (72.22, 123.41) | | 0.53 (0.45, 0.59) | | | 90.39 (64.58, 113.50) | | 0.22 (0.19, 0.24) | | | -11.85 (-21.27, -2.87) | | | -0.48 (-1.13, 0.17) |
| Bahamas | | | 1.58 (1.25, 1.98) | | -25.75 (-42.05, -4.90) | | 0.41 (0.32, 0.51) | | | -50.87 (-61.66, -37.07) | | 0.40 (0.32, 0.50) | | | -62.16 (-70.16, -51.75) | | | -4.03 (-4.61, -3.45) |
| Spain | | | 240.6 (200.21, 270.13) | | 82.98 (59.16, 105.74) | | 0.53 (0.44, 0.59) | | | 55.79 (35.51, 75.18) | | 0.22 (0.19, 0.24) | | | -18.56 (-26.35, -10.17) | | | -0.76 (-1.42, -0.10) |
| Barbados | | | 1.63 (1.31, 2.01) | | -44.88 (-57.28, -29.32) | | 0.55 (0.44, 0.67) | | | -53.29 (-63.79, -40.10) | | 0.36 (0.29, 0.45) | | | -65.64 (-73.45, -56.12) | | | -4.49 (-5.05, -3.92) |
| Serbia | | | 14.8 (8.97, 30.18) | | 15.56 (-20.14, 76.54) | | 0.17 (0.10, 0.34) | | | 24.75 (-13.78, 90.59) | | 0.09 (0.06, 0.19) | | | -35.86 (-57.34, 0.19) | | | -1.7 (-1.86, -1.55) |
| Cook Islands | | | 0.03 (0.02, 0.07) | | -17.67 (-48.27, 27.06) | | 0.17 (0.10, 0.41) | | | -12.21 (-44.84, 35.48) | | 0.14 (0.08, 0.33) | | | -48.03 (-66.8, -18.33) | | | -2.4 (-2.52, -2.28) |
| Bahrain | | | 1.08 (0.5, 2.05) | | 137.55 (13.28, 258.10) | | 0.07 (0.03, 0.13) | | | -21.34 (-62.49, 18.57) | | 0.16 (0.07, 0.31) | | | -18.41 (-56.2, 23.61) | | | -0.04 (-0.66, 0.60) |
| Argentina | | | 108.46 (99.98, 117.73) | | -20.99 (-32.09, -7.72) | | 0.24 (0.22, 0.26) | | | -42.48 (-50.57, -32.82) | | 0.20 (0.19, 0.22) | | | -52.66 (-59.36, -44.46) | | | -2.2 (-2.37, -2.03) |
| Georgia | | | 58.04 (45.46, 72.63) | | 174.69 (95.31, 283.48) | | 1.61 (1.26, 2.01) | | | 320.57 (199.03, 487.13) | | 1.01 (0.79, 1.27) | | | 171.97 (94.17, 280.56) | | | 4.74 (3.9, 5.58) |
| Chile | | | 33.65 (30.42, 36.58) | | 38.47 (23.73, 52.10) | | 0.18 (0.16, 0.19) | | | -2.13 (-12.55, 7.50) | | 0.14 (0.13, 0.16) | | | -33.23 (-39.76, -26.41) | | | -1.49 (-1.91, -1.07) |
| Guam | | | 0.1 (0.05, 0.22) | | -6.84 (-39.21, 31.19) | | 0.07 (0.03, 0.14) | | | -19.94 (-47.76, 12.74) | | 0.06 (0.03, 0.12) | | | -62.13 (-74.07, -45.60) | | | -2.33 (-2.67, -1.99) |
| Jordan | | | 4.35 (1.91, 14.18) | | 164.16 (-4.98, 411.32) | | 0.04 (0.02, 0.12) | | | -19.93 (-71.2, 54.99) | | 0.06 (0.02, 0.20) | | | -2.27 (-61.66, 109.46) | | | 0.88 (0.41, 1.35) |
| Saint Kitts and Nevis | | | 0.04 (0.03, 0.05) | | -47.28 (-63.99, -32.47) | | 0.07 (0.06, 0.08) | | | -62.72 (-74.53, -52.25) | | 0.07 (0.06, 0.09) | | | -65.29 (-76.22, -55.83) | | | -4.22 (-4.83, -3.62) |
| Lebanon | | | 23.43 (17.49, 38.10) | | 13.69 (-31.07, 128.89) | | 0.42 (0.32, 0.69) | | | -38.61 (-62.78, 23.61) | | 0.37 (0.28, 0.59) | | | -58 (-73.89, -25.94) | | | -3.06 (-3.19, -2.94) |
| Russian Federation | | | 220.72 (204.07, 238.34) | | -57.11 (-64.18, -50.63) | | 0.15 (0.14, 0.16) | | | -55.29 (-62.67, -48.55) | | 0.10 (0.10, 0.11) | | | -69.09 (-73.9, -64.63) | | | -4.53 (-4.97, -4.10) |
| Belarus | | | 5.76 (4.74, 6.89) | | 23.18 (-10.45, 71.21) | | 0.06 (0.05, 0.07) | | | 37.97 (0.3, 91.77) | | 0.04 (0.03, 0.05) | | | -4.71 (-29.06, 29.14) | | | -0.37 (-0.55, -0.19) |
| Libya | | | 17.83 (8.05, 31.21) | | 22.8 (-52.49, 108.08) | | 0.26 (0.12, 0.45) | | | -24.66 (-70.85, 27.65) | | 0.37 (0.17, 0.64) | | | 16.94 (-53.75, 107.05) | | | 1.61 (1.24, 1.98) |
| Republic of Moldova | | | 0.32 (0.28, 0.38) | | 324.81 (254.27, 425.30) | | 0.01 (0.01, 0.01) | | | 425.76 (338.46, 550.12) | | 0.01 (0.01, 0.01) | | | 254.15 (192.91, 339.48) | | | 4.88 (2.72, 7.08) |
| Mauritius | | | 11.01 (9.78, 11.99) | | 384.01 (322.01, 447.96) | | 0.87 (0.77, 0.94) | | | 317.03 (263.62, 372.13) | | 0.71 (0.63, 0.77) | | | 170.57 (138.53, 205.88) | | | 4.73 (4.05, 5.43) |
| Niue | | | 0 (0, 0.01) | | -34.03 (-54.86, -7.37) | | 0.24 (0.14, 0.53) | | | -8.95 (-37.69, 27.86) | | 0.23 (0.14, 0.52) | | | -9.93 (-36.93, 24.93) | | | -1.18 (-1.46, -0.90) |
| Malaysia | | | 19.15 (11.46, 64.87) | | 90.59 (22.09, 172.39) | | 0.06 (0.04, 0.20) | | | 5.84 (-32.2, 51.27) | | 0.07 (0.04, 0.26) | | | -16.25 (-46.66, 19.12) | | | -0.37 (-0.56, -0.17) |
| Seychelles | | | 0.08 (0.04, 0.24) | | 13.11 (-20.23, 50.54) | | 0.08 (0.04, 0.23) | | | -21.82 (-44.87, 4.05) | | 0.08 (0.04, 0.25) | | | -33.54 (-53.8, -11.10) | | | -0.93 (-1.04, -0.81) |
| Bosnia and Herzegovina | | | 12.3 (8.89, 16) | | 17.28 (-21.58, 72.69) | | 0.37 (0.27, 0.48) | | | 59.72 (6.8, 135.19) | | 0.21 (0.15, 0.27) | | | -22.49 (-48.57, 14.52) | | | -1.01 (-1.15, -0.88) |
| Oman | | | 2.64 (0.95, 5.07) | | 98.7 (-41.97, 357.26) | | 0.06 (0.02, 0.11) | | | -16.17 (-75.52, 92.91) | | 0.11 (0.04, 0.24) | | | 6.81 (-64.89, 160.87) | | | 1.51 (0.42, 2.61) |
| Hungary | | | 30.76 (25.05, 38.32) | | -28.94 (-45.46, -11.11) | | 0.32 (0.26, 0.40) | | | -23.04 (-40.93, -3.72) | | 0.16 (0.13, 0.21) | | | -48.9 (-60.64, -35.81) | | | -1.45 (-2.26, -0.64) |
| Dominica | | | 0.07 (0.05, 0.17) | | -38.06 (-59.56, 2.90) | | 0.10 (0.07, 0.25) | | | -33.13 (-56.33, 11.10) | | 0.09 (0.07, 0.23) | | | -46.66 (-65.35, -12.11) | | | -2.72 (-3, -2.44) |
| Ukraine | | | 41.72 (30.93, 53.08) | | 1.74 (-27.2, 33.93) | | 0.10 (0.07, 0.12) | | | 24.5 (-10.91, 63.88) | | 0.07 (0.05, 0.09) | | | 3.94 (-24.86, 35.20) | | | 0 (-0.32, 0.33) |
| Northern Mariana Islands | | | 0.05 (0.03, 0.11) | | 78.31 (22.47, 157.41) | | 0.10 (0.06, 0.23) | | | 65.92 (13.96, 139.52) | | 0.11 (0.07, 0.28) | | | -13.78 (-35.26, 12.64) | | | -0.54 (-0.66, -0.41) |
| Uruguay | | | 7.93 (7.08, 8.69) | | 2.05 (-11.61, 19.45) | | 0.23 (0.21, 0.26) | | | -5.93 (-18.52, 10.11) | | 0.16 (0.14, 0.17) | | | -31 (-39.9, -18.97) | | | -1.41 (-1.52, -1.30) |
| Brunei Darussalam | | | 0.95 (0.6, 1.19) | | 8.29 (-20.67, 66.82) | | 0.21 (0.13, 0.26) | | | -37.77 (-54.41, -4.13) | | 0.27 (0.20, 0.34) | | | -43.09 (-57.91, -17.80) | | | -1.48 (-1.61, -1.35) |
| Bulgaria | | | 11.42 (8.47, 14.98) | | -26.83 (-47.76, 2.73) | | 0.17 (0.12, 0.22) | | | -6.42 (-33.19, 31.38) | | 0.09 (0.07, 0.12) | | | -41.37 (-58.85, -17.66) | | | -0.96 (-1.59, -0.32) |
| China | | | 7317.95 (4835.72, 9075.75) | | 80.3 (16.54, 162.59) | | 0.51 (0.34, 0.64) | | | 49.08 (-3.64, 117.13) | | 0.42 (0.28, 0.51) | | | -31.47 (-55.85, 0.91) | | | -0.61 (-0.98, -0.23) |
| Croatia | | | 4.02 (3.34, 4.81) | | -37.43 (-47.91, -23.92) | | 0.10 (0.08, 0.11) | | | -27.72 (-39.83, -12.12) | | 0.05 (0.04, 0.05) | | | -61.37 (-67.46, -53.17) | | | -2.05 (-2.79, -1.30) |
| Trinidad and Tobago | | | 3.01 (2.33, 3.86) | | -33.88 (-49.38, -13.50) | | 0.22 (0.17, 0.28) | | | -42.82 (-56.23, -25.19) | | 0.18 (0.14, 0.24) | | | -61.13 (-70.5, -49.49) | | | -4.12 (-4.7, -3.53) |
| Türkiye | | | 407.93 (312.94, 561.59) | | -24.12 (-47.47, 39.16) | | 0.49 (0.37, 0.67) | | | -47.84 (-63.89, -4.35) | | 0.50 (0.39, 0.69) | | | -58.19 (-72.44, -31.83) | | | -2.53 (-2.68, -2.39) |
| North Macedonia | | | 3.43 (1.76, 6.20) | | 29.35 (-22.99, 86.97) | | 0.16 (0.08, 0.28) | | | 18.41 (-29.5, 71.15) | | 0.12 (0.07, 0.23) | | | -19 (-48.82, 17.34) | | | -1.05 (-1.25, -0.86) |
| Palau | | | 0.02 (0.01, 0.05) | | 14.05 (-19.21, 58.37) | | 0.12 (0.06, 0.26) | | | -4.26 (-32.18, 32.94) | | 0.13 (0.06, 0.30) | | | -31.31 (-49.92, -8.63) | | | -1.12 (-1.19, -1.04) |
| Israel | | | 34.94 (29.87, 39.32) | | 56.83 (17.59, 89.18) | | 0.36 (0.31, 0.41) | | | -18.9 (-39.19, -2.18) | | 0.27 (0.23, 0.30) | | | -43.1 (-56.81, -31.66) | | | -1.78 (-2.12, -1.43) |
| Italy | | | 137.91 (115.44, 152.51) | | -19.16 (-28.87, -12.69) | | 0.23 (0.19, 0.25) | | | -23.23 (-32.45, -17.09) | | 0.09 (0.08, 0.10) | | | -57.98 (-61.29, -55.15) | | | -3.26 (-3.77, -2.74) |
| Montenegro | | | 0.29 (0.13, 1.71) | | 11.27 (-32.67, 63.53) | | 0.05 (0.02, 0.28) | | | 12.73 (-31.79, 65.68) | | 0.03 (0.02, 0.20) | | | -22.49 (-53.77, 15.24) | | | -1.02 (-1.25, -0.78) |
| Greece | | | 87.19 (75.86, 97.73) | | 173 (141.72, 209.96) | | 0.86 (0.75, 0.96) | | | 178.75 (146.81, 216.49) | | 0.32 (0.29, 0.36) | | | 33.41 (20.3, 47.92) | | | 0.81 (0.38, 1.25) |
| Middle SDI |  | | |  | | | |  | | |  | | |  | | |  | |
| Ecuador | | | 27.3 (22.91, 32.30) | | 51.18 (13.96, 107.84) | | 0.15 (0.13, 0.18) | | | -16.5 (-37.05, 14.80) | | 0.18 (0.15, 0.21) | | | -34.24 (-51.78, -2.95) | | | -0.96 (-1.53, -0.39) |
| Peru | | | 42.84 (30.81, 62.50) | | 1.16 (-30.54, 52.59) | | 0.12 (0.08, 0.17) | | | -39.66 (-58.57, -8.98) | | 0.13 (0.09, 0.18) | | | -49.26 (-63.46, -28.24) | | | -2.04 (-2.22, -1.87) |
| Philippines | | | 69.9 (47.94, 183.52) | | 35.72 (4.41, 87.54) | | 0.06 (0.04, 0.16) | | | -24.49 (-41.91, 4.34) | | 0.08 (0.05, 0.24) | | | -29.57 (-46.36, -6.97) | | | -0.87 (-1.08, -0.66) |
| South Africa | | | 46.42 (34.93, 54.51) | | 57.92 (25.69, 94.15) | | 0.08 (0.06, 0.10) | | | 2.81 (-18.17, 26.40) | | 0.09 (0.07, 0.11) | | | -11.43 (-32.67, 11.49) | | | -0.22 (-0.44, 0) |
| Algeria | | | 119.31 (42.52, 184.58) | | 129.18 (-32.81, 302.41) | | 0.27 (0.1, 0.42) | | | 31.12 (-61.56, 130.24) | | 0.4 (0.13, 0.61) | | | 27.47 (-53.07, 118.71) | | | 2.02 (1.53, 2.51) |
| Botswana | | | 1.79 (1.23, 2.43) | | 30.92 (-13.7, 98.25) | | 0.07 (0.05, 0.10) | | | -27.83 (-52.43, 9.28) | | 0.10 (0.07, 0.14) | | | -41.89 (-61.23, -9.69) | | | -1.71 (-1.81, -1.61) |
| Sri Lanka | | | 101.29 (63.11, 147.64) | | 84.19 (-8.27, 214.25) | | 0.45 (0.28, 0.66) | | | 41.68 (-29.44, 141.73) | | 0.42 (0.27, 0.60) | | | -0.47 (-49.78, 67.99) | | | 0.93 (0.51, 1.35) |
| Thailand | | | 62.39 (34.54, 281.83) | | 56.8 (-3.56, 154.38) | | 0.09 (0.05, 0.42) | | | 33.48 (-17.91, 116.54) | | 0.07 (0.04, 0.28) | | | -24.22 (-48.63, 14.13) | | | -1.16 (-1.34, -0.98) |
| Viet Nam | | | 105.57 (52.95, 331.83) | | 51.14 (-8.21, 148.46) | | 0.11 (0.05, 0.33) | | | 2.84 (-37.54, 69.07) | | 0.12 (0.06, 0.40) | | | -21.55 (-51.31, 25.37) | | | -0.82 (-0.87, -0.77) |
| Colombia | | | 51.87 (42.97, 62.50) | | 51.79 (10.17, 102.64) | | 0.11 (0.09, 0.13) | | | 0.53 (-27.04, 34.20) | | 0.10 (0.08, 0.12) | | | -37.57 (-54.23, -16.71) | | | -1.73 (-2.13, -1.32) |
| Fiji | | | 1.01 (0.54, 2.06) | | 16.01 (-19.69, 57.47) | | 0.11 (0.06, 0.22) | | | -4.83 (-34.12, 29.18) | | 0.15 (0.08, 0.32) | | | -27.99 (-49.82, -2.74) | | | -1.24 (-1.34, -1.15) |
| Azerbaijan | | | 53.66 (32.46, 82.50) | | 45.04 (-8.86, 130.48) | | 0.51 (0.31, 0.79) | | | 1.2 (-36.41, 60.82) | | 0.57 (0.36, 0.85) | | | -18.1 (-44.51, 22.01) | | | -1.02 (-1.16, -0.89) |
| Turkmenistan | | | 9.49 (7.09, 12.41) | | 126.81 (62.74, 223.22) | | 0.18 (0.14, 0.24) | | | 62.65 (16.71, 131.79) | | 0.23 (0.17, 0.31) | | | 27.02 (-8.63, 86.54) | | | 0.34 (0.07, 0.61) |
| Nauru | | | 0.02 (0.01, 0.04) | | 10.1 (-21.97, 68.09) | | 0.18 (0.11, 0.40) | | | 1.92 (-27.77, 55.60) | | 0.37 (0.24, 1.00) | | | 16.42 (-27.86, 114.69) | | | 0.57 (0.22, 0.92) |
| Uzbekistan | | | 96.84 (77.07, 119.02) | | 41.6 (3.42, 94.05) | | 0.28 (0.23, 0.35) | | | -13.31 (-36.68, 18.81) | | 0.37 (0.30, 0.46) | | | -19.09 (-43.74, 16.27) | | | -0.4 (-0.64, -0.17) |
| Iran (Islamic Republic of) | | | 428.63 (285.6, 493.98) | | -8.91 (-39.72, 33.93) | | 0.50 (0.33, 0.58) | | | -39.06 (-59.68, -10.40) | | 0.61 (0.40, 0.70) | | | -56.37 (-69.24, -36.23) | | | -2.45 (-2.55, -2.36) |
| Albania | | | 11.03 (7.11, 19.33) | | -3.52 (-37.92, 73.65) | | 0.41 (0.27, 0.72) | | | 19.52 (-23.09, 115.13) | | 0.28 (0.19, 0.48) | | | -45.7 (-64.54, -8.44) | | | -1.78 (-2.01, -1.55) |
| Iraq | | | 37.56 (19.83, 79.91) | | 0.31 (-33.53, 65.29) | | 0.09 (0.05, 0.19) | | | -55.19 (-70.31, -26.15) | | 0.15 (0.08, 0.38) | | | -39.64 (-62.41, -5.94) | | | -1.8 (-1.86, -1.73) |
| Jamaica | | | 2.11 (1.65, 2.72) | | -51.75 (-64.55, -37.33) | | 0.08 (0.06, 0.10) | | | -59.24 (-70.05, -47.05) | | 0.07 (0.05, 0.09) | | | -65.81 (-75.15, -55.45) | | | -4.43 (-4.92, -3.94) |
| Tokelau | | | 0 (0, 0.01) | | 2.35 (-30.53, 59.37) | | 0.28 (0.18, 0.73) | | | 19.05 (-19.2, 85.37) | | 0.29 (0.18, 0.73) | | | -2.12 (-33.74, 52.37) | | | -1.04 (-1.36, -0.71) |
| Costa Rica | | | 5.61 (4.85, 6.30) | | -32.97 (-42.98, -22.83) | | 0.12 (0.10, 0.13) | | | -57.06 (-63.47, -50.56) | | 0.10 (0.09, 0.12) | | | -75.78 (-79.43, -72.01) | | | -5.69 (-6.33, -5.04) |
| Indonesia | | | 267.71 (170.28, 672.39) | | 44.68 (4.44, 109.33) | | 0.10 (0.06, 0.24) | | | -4.05 (-30.73, 38.83) | | 0.12 (0.07, 0.37) | | | -15.23 (-37.85, 20.69) | | | -0.61 (-0.7, -0.51) |
| Palestine | | | 3.85 (1.54, 10.54) | | -7.79 (-40.56, 44.75) | | 0.07 (0.03, 0.21) | | | -63.25 (-76.31, -42.31) | | 0.13 (0.05, 0.41) | | | -43.49 (-60.99, -13.17) | | | -1.73 (-1.83, -1.64) |
| Mexico | | | 100.75 (88.65, 112.26) | | 20.73 (-4.08, 42.95) | | 0.08 (0.07, 0.09) | | | -20.26 (-36.64, -5.58) | | 0.09 (0.08, 0.10) | | | -41.67 (-52.78, -29.37) | | | -1.94 (-2.36, -1.51) |
| Cuba | | | 8.64 (7.53, 9.86) | | -20.21 (-33.18, -5.88) | | 0.08 (0.07, 0.09) | | | -23.2 (-35.68, -9.40) | | 0.05 (0.04, 0.06) | | | -53.09 (-61.13, -44.44) | | | -3.53 (-4.12, -2.94) |
| Panama | | | 2.57 (2.04, 3.08) | | -18.57 (-37.65, 4.65) | | 0.06 (0.05, 0.07) | | | -54.68 (-65.3, -41.75) | | 0.06 (0.05, 0.07) | | | -69.51 (-76.88, -60.50) | | | -4.82 (-5.49, -4.14) |
| Dominican Republic | | | 8.76 (5.98, 23.26) | | -24.79 (-53.74, 58.28) | | 0.08 (0.05, 0.21) | | | -51.16 (-69.96, 2.77) | | 0.08 (0.06, 0.23) | | | -49.96 (-66.35, -18.66) | | | -2.72 (-3.01, -2.43) |
| Saint Lucia | | | 0.52 (0.43, 0.62) | | -32.74 (-46.15, -17.55) | | 0.29 (0.24, 0.35) | | | -48.26 (-58.57, -36.57) | | 0.24 (0.20, 0.29) | | | -69.72 (-75.76, -62.74) | | | -5.16 (-5.73, -4.59) |
| Grenada | | | 0.27 (0.23, 0.31) | | -57.78 (-66.48, -47.64) | | 0.27 (0.23, 0.30) | | | -64.2 (-71.58, -55.60) | | 0.26 (0.22, 0.29) | | | -67.94 (-74.61, -60.34) | | | -4.67 (-5.32, -4.02) |
| Guyana | | | 2.67 (2.05, 3.46) | | 127.97 (70.09, 195.91) | | 0.35 (0.27, 0.45) | | | 132.42 (73.41, 201.69) | | 0.39 (0.30, 0.50) | | | 132 (74.2, 201.82) | | | 0.29 (-1.55, 2.17) |
| Brazil | | | 775.14 (709.73, 818.47) | | 97.88 (81.99, 113.80) | | 0.35 (0.32, 0.37) | | | 33.36 (22.65, 44.09) | | 0.33 (0.30, 0.34) | | | -14.41 (-19.9, -8.68) | | | -0.56 (-1.09, -0.03) |
| Paraguay | | | 4.25 (2.58, 12.43) | | 76.2 (15.97, 153.34) | | 0.06 (0.04, 0.17) | | | -0.64 (-34.6, 42.86) | | 0.07 (0.04, 0.22) | | | -14.72 (-44.95, 22.79) | | | -0.25 (-0.38, -0.12) |
| Maldives | | | 0.75 (0.57, 1.14) | | -11.73 (-42.73, 78.64) | | 0.14 (0.11, 0.22) | | | -62.07 (-75.39, -23.24) | | 0.19 (0.15, 0.30) | | | -63.49 (-73.98, -43.91) | | | -3.36 (-3.45, -3.27) |
| Saint Vincent and the Grenadines | | | 0.08 (0.07, 0.09) | | -3.74 (-19.01, 15.81) | | 0.07 (0.06, 0.08) | | | -7.6 (-22.25, 11.17) | | 0.06 (0.05, 0.07) | | | -29.73 (-40.37, -16.63) | | | -3.06 (-4.08, -2.03) |
| Syrian Arab Republic | | | 6.17 (2.73, 33.04) | | -39.5 (-71.24, 1.12) | | 0.04 (0.02, 0.24) | | | -45.16 (-73.93, -8.34) | | 0.06 (0.03, 0.29) | | | -41.03 (-64.92, -4.28) | | | -1.92 (-2.24, -1.60) |
| Suriname | | | 1.88 (1.4, 2.77) | | -23.51 (-46.99, 52.88) | | 0.32 (0.24, 0.48) | | | -48.93 (-64.61, 2.06) | | 0.32 (0.24, 0.47) | | | -56.31 (-69.35, -21.10) | | | -3.15 (-3.42, -2.88) |
| Tunisia | | | 39.6 (12.16, 66.67) | | 159.79 (-28.04, 430.86) | | 0.33 (0.10, 0.56) | | | 83.16 (-49.27, 274.27) | | 0.36 (0.11, 0.60) | | | 41.46 (-54.29, 188.45) | | | 1.76 (1.45, 2.08) |
| Tonga | | | 0.12 (0.08, 0.28) | | 0.82 (-31.68, 44.20) | | 0.11 (0.07, 0.26) | | | -6.25 (-36.47, 34.09) | | 0.14 (0.09, 0.34) | | | -28.96 (-52.29, -1) | | | -1.04 (-1.1, -0.97) |
| Equatorial Guinea | | | 0.81 (0.44, 1.44) | | 11.27 (-33.43, 111.35) | | 0.05 (0.03, 0.10) | | | -68.89 (-81.39, -40.91) | | 0.11 (0.06, 0.20) | | | -56.8 (-74.7, -18.16) | | | -3.04 (-3.26, -2.83) |
| Gabon | | | 1.45 (0.77, 2.58) | | 5.21 (-28.09, 59.07) | | 0.08 (0.04, 0.14) | | | -43.02 (-61.06, -13.85) | | 0.13 (0.07, 0.24) | | | -37.82 (-58, -3.44) | | | -1.48 (-1.55, -1.41) |
| Armenia | | | 3.18 (2.59, 3.79) | | -53.21 (-65.2, -38.77) | | 0.11 (0.09, 0.13) | | | -46.57 (-60.26, -30.07) | | 0.08 (0.06, 0.09) | | | -69.14 (-77.4, -58.94) | | | -4.83 (-5.7, -3.95) |
| Low Middle SDI | |  | | | |  | | |  | | | |  | | |  | | |
| Tuvalu | | | 0.02 (0.01, 0.05) | | -14.25 (-37.8, 26.89) | | 0.18 (0.11, 0.37) | | | -34.05 (-52.16, -2.41) | | 0.23 (0.15, 0.52) | | | -38.92 (-55.65, -11.44) | | | -1.6 (-1.63, -1.57) |
| Lesotho | | | 1.9 (1.28, 2.56) | | 33.01 (-23.25, 118.70) | | 0.10 (0.07, 0.14) | | | 8.75 (-37.25, 78.82) | | 0.14 (0.10, 0.20) | | | 0.41 (-42.76, 73.91) | | | 0.49 (0.22, 0.77) |
| Mauritania | | | 3.71 (1.76, 6.89) | | 39.43 (-3.81, 108.04) | | 0.08 (0.04, 0.16) | | | -34.84 (-55.05, -2.77) | | 0.14 (0.06, 0.28) | | | -29.64 (-50.79, 3.68) | | | -1.19 (-1.24, -1.14) |
| Bangladesh | | | 382.58 (189.27, 663.54) | | 45.56 (-8.12, 119.30) | | 0.23 (0.11, 0.40) | | | -3.52 (-39.1, 45.35) | | 0.30 (0.14, 0.57) | | | -28.67 (-50.65, 11.07) | | | -0.99 (-1.22, -0.77) |
| Namibia | | | 2.18 (1.5, 3.03) | | 59.64 (5.97, 138.03) | | 0.09 (0.06, 0.12) | | | -7.81 (-38.8, 37.47) | | 0.13 (0.09, 0.19) | | | -18.09 (-44.23, 19.08) | | | -0.66 (-0.77, -0.54) |
| Bhutan | | | 1.81 (0.91, 2.96) | | 23.79 (-28.09, 112.86) | | 0.24 (0.12, 0.39) | | | 3.04 (-40.14, 77.18) | | 0.31 (0.15, 0.52) | | | -21.47 (-45.9, 28.70) | | | -0.89 (-0.94, -0.84) |
| Nigeria | | | 227.64 (153.3, 332.36) | | 41.2 (-5.15, 107.94) | | 0.10 (0.07, 0.14) | | | -45 (-63.06, -19.01) | | 0.14 (0.07, 0.23) | | | -42.77 (-63.25, -11.36) | | | -2.05 (-2.23, -1.87) |
| India | | | 2611.57 (1738.58, 4059.81) | | 48.74 (10.77, 112.10) | | 0.18 (0.12, 0.29) | | | -10.29 (-33.2, 27.92) | | 0.24 (0.15, 0.39) | | | -19.6 (-40.92, 8.44) | | | -0.44 (-0.58, -0.30) |
| Comoros | | | 0.84 (0.41, 1.65) | | -12.47 (-44.34, 37.98) | | 0.11 (0.05, 0.22) | | | -45.61 (-65.41, -14.26) | | 0.15 (0.07, 0.30) | | | -44.4 (-60.74, -15.99) | | | -2.09 (-2.35, -1.83) |
| Eswatini | | | 1.04 (0.68, 1.45) | | 27.81 (-21.27, 100.20) | | 0.09 (0.06, 0.13) | | | -10.79 (-45.05, 39.75) | | 0.13 (0.09, 0.18) | | | -27.54 (-55.12, 17.55) | | | -0.68 (-0.94, -0.42) |
| Sao Tome and Principe | | | 0.17 (0.06, 0.32) | | 10.24 (-34.97, 74.53) | | 0.08 (0.03, 0.15) | | | -38.28 (-63.59, -2.28) | | 0.13 (0.05, 0.24) | | | -21.59 (-42.96, 11.48) | | | -0.7 (-0.82, -0.57) |
| Kyrgyzstan | | | 2.41 (1.95, 2.96) | | -21.51 (-41.05, 3.26) | | 0.04 (0.03, 0.04) | | | -48.95 (-61.66, -32.84) | | 0.05 (0.04, 0.06) | | | -46.54 (-59.21, -31.51) | | | -2.25 (-2.71, -1.80) |
| Zimbabwe | | | 18.38 (11.85, 26.91) | | 122.63 (40.42, 264.54) | | 0.12 (0.08, 0.17) | | | 47.65 (-6.88, 141.76) | | 0.18 (0.12, 0.26) | | | 19.55 (-20.77, 100.66) | | | 0.94 (0.61, 1.27) |
| Pakistan | | | 484.97 (311.47, 747.24) | | 56.06 (18.56, 114.51) | | 0.21 (0.13, 0.32) | | | -26.38 (-44.07, 1.20) | | 0.32 (0.18, 0.56) | | | -6.19 (-31.96, 28.70) | | | -0.21 (-0.35, -0.06) |
| Mongolia | | | 34.25 (19.88, 43.98) | | 70.02 (10.77, 166.20) | | 1.03 (0.6, 1.32) | | | 9.96 (-28.35, 72.17) | | 1.59 (0.91, 2.05) | | | -8.5 (-41.06, 47.34) | | | -0.41 (-0.56, -0.26) |
| Belize | | | 0.5 (0.44, 0.56) | | -35.82 (-45.59, -25.61) | | 0.12 (0.10, 0.13) | | | -72.04 (-76.3, -67.59) | | 0.15 (0.13, 0.16) | | | -68.46 (-73.69, -62.97) | | | -4.69 (-5.33, -4.05) |
| Tajikistan | | | 53.18 (34.31, 72.52) | | 28.14 (-12.51, 86.16) | | 0.52 (0.34, 0.71) | | | -32.28 (-53.76, -1.63) | | 0.81 (0.53, 1.09) | | | -33.57 (-55.55, -6.48) | | | -1.65 (-1.93, -1.37) |
| Kiribati | | | 0.18 (0.1, 0.36) | | 40.21 (4.52, 91.15) | | 0.15 (0.09, 0.29) | | | -13.9 (-35.82, 17.39) | | 0.25 (0.16, 0.57) | | | -16.25 (-39.45, 13.61) | | | -0.65 (-0.69, -0.60) |
| Djibouti | | | 1.2 (0.54, 2.33) | | 100.74 (14.26, 257.38) | | 0.10 (0.04, 0.19) | | | -33.93 (-62.4, 17.62) | | 0.15 (0.07, 0.29) | | | -32.8 (-53.4, 2.97) | | | -1.41 (-1.5, -1.31) |
| Democratic People's Republic of Korea | | | 95.21 (66.92, 160.09) | | 120.02 (53.51, 221.46) | | 0.36 (0.25, 0.61) | | | 71.66 (19.77, 150.81) | | 0.35 (0.24, 0.58) | | | 1.63 (-28.9, 46.68) | | | 0.34 (0.15, 0.52) |
| Egypt | | | 282.17 (220.48, 376.81) | | -61.2 (-75.52, -17.97) | | 0.27 (0.21, 0.36) | | | -79.67 (-87.17, -57.03) | | 0.36 (0.28, 0.50) | | | -69.08 (-78.39, -48.68) | | | -3.6 (-3.77, -3.43) |
| Cameroon | | | 31.63 (19.03, 53.48) | | 108.14 (50.64, 210.87) | | 0.10 (0.06, 0.17) | | | -31.64 (-50.53, 2.10) | | 0.17 (0.08, 0.31) | | | -30.21 (-51.6, 11.76) | | | -1.11 (-1.29, -0.93) |
| Cabo Verde | | | 0.59 (0.22, 1.10) | | -7.76 (-35.23, 50.05) | | 0.11 (0.04, 0.20) | | | -41.65 (-59.02, -5.07) | | 0.13 (0.05, 0.24) | | | -37.97 (-58.19, 7.78) | | | -1.82 (-1.96, -1.68) |
| Kenya | | | 32.91 (14.34, 65.25) | | 70.24 (26.71, 144.62) | | 0.07 (0.03, 0.13) | | | -21.28 (-41.41, 13.11) | | 0.12 (0.05, 0.23) | | | -15.82 (-35.99, 34.20) | | | -0.37 (-0.47, -0.27) |
| Congo | | | 4.45 (2.62, 8.34) | | 40.57 (1.56, 101.80) | | 0.08 (0.05, 0.15) | | | -37.38 (-54.76, -10.10) | | 0.15 (0.08, 0.29) | | | -33.42 (-49.39, -10.42) | | | -1.4 (-1.48, -1.32) |
| Sudan | | | 123.99 (59.59, 183.20) | | 72.74 (-39.31, 222.72) | | 0.29 (0.14, 0.42) | | | -20.35 (-72.02, 48.81) | | 0.42 (0.18, 0.61) | | | 13.34 (-58.83, 96.57) | | | 1.06 (0.68, 1.44) |
| Ghana | | | 25.94 (14.16, 44.39) | | 33.57 (-6.25, 99.14) | | 0.08 (0.04, 0.13) | | | -41.61 (-59.01, -12.94) | | 0.13 (0.06, 0.23) | | | -41.22 (-62.58, -5.97) | | | -1.86 (-1.98, -1.73) |
| Cambodia | | | 16.81 (10.07, 38.10) | | 41.5 (-19.02, 149.24) | | 0.10 (0.06, 0.22) | | | -14.72 (-51.19, 50.22) | | 0.13 (0.07, 0.35) | | | -20.92 (-46.33, 26.29) | | | -0.85 (-0.89, -0.80) |
| Morocco | | | 131.02 (50.26, 201.15) | | 82.53 (-44.49, 211.43) | | 0.35 (0.14, 0.54) | | | 24.5 (-62.14, 112.41) | | 0.43 (0.15, 0.67) | | | 32.18 (-51.58, 122.59) | | | 1.61 (1.29, 1.94) |
| El Salvador | | | 7.74 (5.29, 15.88) | | -36.59 (-60.6, 24.61) | | 0.12 (0.08, 0.25) | | | -47.84 (-67.59, 2.50) | | 0.12 (0.08, 0.24) | | | -59.08 (-75.12, -28.91) | | | -3.52 (-3.77, -3.27) |
| Lao People's Democratic Republic | | | 8.76 (4.79, 20.04) | | 15.64 (-27.37, 101.16) | | 0.12 (0.06, 0.27) | | | -34.64 (-58.95, 13.69) | | 0.15 (0.09, 0.36) | | | -33.26 (-53.96, 2.13) | | | -1.43 (-1.51, -1.35) |
| Guatemala | | | 6.66 (5.66, 7.77) | | -51.29 (-62.53, -39.91) | | 0.04 (0.04, 0.05) | | | -74.1 (-80.07, -68.05) | | 0.06 (0.05, 0.07) | | | -77.59 (-82.28, -71.85) | | | -5.93 (-6.54, -5.31) |
| Honduras | | | 11.73 (7.75, 18.46) | | 74.8 (19.37, 144.78) | | 0.12 (0.08, 0.18) | | | -18.57 (-44.39, 14.04) | | 0.20 (0.12, 0.32) | | | -23.66 (-49.05, 13.29) | | | -0.99 (-1.13, -0.85) |
| Nicaragua | | | 2.31 (1.42, 8.77) | | -44.11 (-69.78, 51.71) | | 0.03 (0.02, 0.13) | | | -67.42 (-82.39, -11.56) | | 0.05 (0.03, 0.19) | | | -66.52 (-80.47, -28.64) | | | -3.92 (-4.2, -3.64) |
| Venezuela (Bolivarian Republic of) | | | 12.03 (9.21, 15.33) | | -13.65 (-36.28, 15.70) | | 0.05 (0.03, 0.06) | | | -39.01 (-55, -18.28) | | 0.04 (0.03, 0.06) | | | -59.77 (-70.09, -46.48) | | | -4.16 (-4.73, -3.59) |
| Zambia | | | 25.73 (9.48, 51.66) | | 110.6 (-13.11, 297.70) | | 0.13 (0.05, 0.26) | | | -14.35 (-64.66, 61.74) | | 0.24 (0.08, 0.49) | | | 3.24 (-44.6, 62.06) | | | 0.42 (0.21, 0.62) |
| Marshall Islands | | | 0.08 (0.05, 0.17) | | 24.55 (-18.27, 81.20) | | 0.15 (0.09, 0.30) | | | 0.54 (-34.02, 46.28) | | 0.23 (0.14, 0.50) | | | -29.89 (-51.81, 0.69) | | | -1.2 (-1.28, -1.13) |
| Micronesia (Federated States of) | | | 0.16 (0.1, 0.33) | | -16.15 (-40.16, 18.04) | | 0.16 (0.10, 0.33) | | | -15.41 (-39.63, 19.08) | | 0.24 (0.15, 0.55) | | | -33.09 (-52.77, -6.71) | | | -1.33 (-1.43, -1.23) |
| Samoa | | | 0.3 (0.2, 0.64) | | 14.95 (-11.31, 46.78) | | 0.14 (0.09, 0.30) | | | -9.1 (-29.87, 16.06) | | 0.20 (0.13, 0.47) | | | -26.85 (-45.26, -4.65) | | | -1 (-1.06, -0.94) |
| Bolivia (Plurinational State of) | | | 21.16 (14.84, 30.39) | | -8.51 (-38.89, 50.37) | | 0.18 (0.13, 0.26) | | | -50.51 (-66.95, -18.66) | | 0.24 (0.17, 0.34) | | | -43.34 (-58.13, -16.24) | | | -1.83 (-1.87, -1.79) |
| Myanmar | | | 75.38 (48.28, 178.16) | | 7.61 (-31.81, 84.94) | | 0.13 (0.09, 0.32) | | | -22.87 (-51.12, 32.56) | | 0.15 (0.10, 0.42) | | | -30.05 (-50.76, 9.89) | | | -1.43 (-1.58, -1.27) |
| Vanuatu | | | 0.44 (0.29, 0.88) | | 89.67 (33.46, 166.80) | | 0.14 (0.09, 0.28) | | | -7.75 (-35.09, 29.76) | | 0.22 (0.14, 0.52) | | | -19.39 (-41.66, 11.41) | | | -0.89 (-1.01, -0.77) |
| Low SDI |  | | |  | | | |  | | |  | | |  | | |  | |
| Yemen | | | 106.18 (49.25, 160.25) | | 142.48 (-11.43, 291.91) | | 0.32 (0.15, 0.48) | | | -1.73 (-64.11, 58.83) | | 0.55 (0.21, 0.90) | | | 37.54 (-45.05, 142.71) | | | 1.61 (1.25, 1.96) |
| Mali | | | 27.38 (12.76, 52.77) | | 89.6 (32.63, 170.37) | | 0.11 (0.05, 0.22) | | | -31.86 (-52.33, -2.83) | | 0.18 (0.06, 0.38) | | | -21.63 (-41.9, 10.89) | | | -0.66 (-0.71, -0.60) |
| Afghanistan | | | 125.41 (56.31, 188.57) | | 229.87 (41.63, 421.25) | | 0.4 (0.18, 0.60) | | | 5.06 (-54.9, 66.01) | | 0.67 (0.24, 1.10) | | | 63.96 (-35.32, 165.12) | | | 2.38 (1.97, 2.80) |
| Burundi | | | 15.92 (6.39, 31.86) | | 2.49 (-45.12, 66.92) | | 0.12 (0.05, 0.24) | | | -56.95 (-76.95, -29.88) | | 0.21 (0.07, 0.44) | | | -43.29 (-70.47, -13.15) | | | -2.01 (-2.12, -1.89) |
| Niger | | | 30.57 (10.78, 61.19) | | 108.27 (11.89, 226.58) | | 0.12 (0.04, 0.24) | | | -33.19 (-64.11, 4.77) | | 0.23 (0.05, 0.52) | | | -18.84 (-45.76, 12.21) | | | -0.63 (-0.69, -0.57) |
| Timor-Leste | | | 1.63 (0.96, 3.71) | | 47.31 (-11.84, 143.91) | | 0.12 (0.07, 0.27) | | | -17.67 (-50.73, 36.31) | | 0.15 (0.08, 0.43) | | | -18.41 (-41.53, 20.90) | | | -0.6 (-0.8, -0.40) |
| Nepal | | | 67.87 (34.14, 116.67) | | 24.66 (-27.49, 90.86) | | 0.22 (0.11, 0.37) | | | -22.03 (-54.65, 19.37) | | 0.31 (0.15, 0.58) | | | -18.85 (-43.32, 18.26) | | | -0.65 (-0.78, -0.51) |
| Senegal | | | 17.87 (7.15, 31.77) | | 32.92 (-17.28, 104.86) | | 0.11 (0.05, 0.20) | | | -36.03 (-60.19, -1.41) | | 0.18 (0.06, 0.33) | | | -28.14 (-52.08, 2.61) | | | -1 (-1.12, -0.88) |
| Sierra Leone | | | 12.38 (6.57, 20.64) | | 25.17 (-21.07, 105.52) | | 0.14 (0.07, 0.23) | | | -41.39 (-63.05, -3.78) | | 0.2 (0.08, 0.34) | | | -27 (-47.28, 6.82) | | | -1.04 (-1.17, -0.91) |
| Benin | | | 12.81 (6.69, 20.49) | | 77.67 (20.93, 180.80) | | 0.09 (0.05, 0.15) | | | -36.16 (-56.55, 0.90) | | 0.15 (0.06, 0.27) | | | -28.02 (-50.09, 5.71) | | | -0.96 (-1.06, -0.86) |
| Togo | | | 8.78 (4.03, 14.62) | | 79.25 (16.47, 184.64) | | 0.10 (0.05, 0.17) | | | -21.91 (-49.26, 24) | | 0.18 (0.07, 0.31) | | | -20.08 (-43.26, 20.97) | | | -0.71 (-0.84, -0.58) |
| Eritrea | | | 8.5 (3.97, 16.23) | | 19.99 (-21.75, 83.67) | | 0.13 (0.06, 0.25) | | | -38.06 (-59.61, -5.19) | | 0.21 (0.09, 0.43) | | | -28.58 (-48.56, 5.70) | | | -1.12 (-1.24, -1) |
| South Sudan | | | 16.92 (8.78, 30.28) | | 12.33 (-24.95, 86.07) | | 0.17 (0.09, 0.31) | | | -31.74 (-54.4, 13.06) | | 0.24 (0.09, 0.44) | | | -26.53 (-46.88, 11.31) | | | -1.11 (-1.43, -0.79) |
| Burkina Faso | | | 35.96 (17.27, 59.45) | | 79.12 (29.25, 152.33) | | 0.16 (0.08, 0.26) | | | -25.02 (-45.89, 5.63) | | 0.27 (0.09, 0.52) | | | -16.3 (-40.57, 18.91) | | | -0.32 (-0.41, -0.22) |
| Angola | | | 30.49 (16.39, 57.06) | | 70.85 (2.28, 191.20) | | 0.09 (0.05, 0.17) | | | -46.32 (-67.86, -8.51) | | 0.19 (0.09, 0.36) | | | -29.56 (-48.04, 5.88) | | | -1.13 (-1.19, -1.07) |
| Ethiopia | | | 97.35 (38.22, 203.37) | | 6.22 (-35.99, 66.02) | | 0.09 (0.04, 0.19) | | | -50.69 (-70.29, -22.93) | | 0.15 (0.05, 0.30) | | | -44.98 (-60.77, -21.88) | | | -2.29 (-2.41, -2.17) |
| Central African Republic | | | 7.73 (3.82, 13.81) | | 42.99 (-4.62, 107.79) | | 0.14 (0.07, 0.25) | | | -28.8 (-52.51, 3.46) | | 0.25 (0.10, 0.45) | | | -18.48 (-37.71, 9.81) | | | -0.62 (-0.66, -0.59) |
| Chad | | | 27.39 (14.59, 48.71) | | 139.52 (68.02, 258.78) | | 0.15 (0.08, 0.27) | | | -18.68 (-42.95, 21.82) | | 0.24 (0.08, 0.47) | | | -4.81 (-34.45, 40.10) | | | -0.17 (-0.32, -0.01) |
| Cote d'Ivoire | | | 30.73 (15.98, 49.62) | | 76.02 (25.11, 164.53) | | 0.11 (0.06, 0.18) | | | -22.94 (-45.23, 15.82) | | 0.18 (0.07, 0.32) | | | -26.78 (-48.62, 9.40) | | | -0.9 (-1.01, -0.80) |
| Gambia | | | 2.57 (1.17, 4.68) | | 91.68 (39.29, 169.50) | | 0.11 (0.05, 0.20) | | | -21.41 (-42.89, 10.49) | | 0.19 (0.07, 0.34) | | | -19.98 (-45.79, 24) | | | -0.8 (-0.93, -0.67) |
| Madagascar | | | 58.23 (30.96, 112.10) | | 53.7 (8.97, 106.98) | | 0.20 (0.11, 0.39) | | | -35.95 (-54.59, -13.75) | | 0.31 (0.15, 0.61) | | | -25.74 (-46.06, -2.66) | | | -0.87 (-0.92, -0.82) |
| Malawi | | | 18.71 (9.07, 33.13) | | 9.71 (-33.73, 73.27) | | 0.10 (0.05, 0.17) | | | -44.69 (-66.59, -12.64) | | 0.16 (0.07, 0.30) | | | -25.36 (-42.06, 2.41) | | | -1.06 (-1.2, -0.91) |
| Guinea | | | 18.55 (9.16, 32.09) | | 43.08 (-7.63, 138.86) | | 0.14 (0.07, 0.24) | | | -36.14 (-58.77, 6.61) | | 0.21 (0.08, 0.41) | | | -18.39 (-44.26, 27.39) | | | -0.52 (-0.65, -0.39) |
| Guinea-Bissau | | | 2.67 (1.33, 4.67) | | 27.12 (-12.88, 85.02) | | 0.13 (0.06, 0.23) | | | -37.97 (-57.49, -9.72) | | 0.23 (0.10, 0.42) | | | -27.99 (-43.74, -3.81) | | | -0.97 (-1.06, -0.88) |
| Liberia | | | 5.94 (2.59, 10.70) | | 9.05 (-42.45, 87.89) | | 0.11 (0.05, 0.20) | | | -50.85 (-74.06, -15.32) | | 0.19 (0.07, 0.36) | | | -30.55 (-52.37, 2.88) | | | -1.25 (-1.36, -1.14) |
| Mozambique | | | 40.25 (18.01, 70.27) | | 55.93 (1.92, 143.37) | | 0.13 (0.06, 0.23) | | | -32.96 (-56.18, 4.64) | | 0.24 (0.09, 0.46) | | | -11.59 (-37.19, 29.22) | | | -0.04 (-0.21, 0.13) |
| Rwanda | | | 13.93 (6.15, 29.60) | | -22.8 (-58.79, 37.06) | | 0.10 (0.05, 0.22) | | | -58.18 (-77.67, -25.74) | | 0.17 (0.07, 0.37) | | | -51.31 (-70.65, -25.48) | | | -3.05 (-3.3, -2.79) |
| Uganda | | | 40.67 (22.16, 72.11) | | 8.72 (-26.31, 69.23) | | 0.09 (0.05, 0.17) | | | -56.6 (-70.58, -32.44) | | 0.15 (0.07, 0.28) | | | -46.48 (-68.27, -6.63) | | | -2.36 (-2.48, -2.24) |
| Somalia | | | 34.2 (9.37, 73.40) | | 73.85 (-8.89, 161.37) | | 0.16 (0.04, 0.34) | | | -36.13 (-66.53, -3.97) | | 0.27 (0.06, 0.58) | | | -26.46 (-53.61, 7.86) | | | -0.91 (-1.01, -0.80) |
| Solomon Islands | | | 0.76 (0.49, 1.45) | | 89.92 (31.23, 175.04) | | 0.11 (0.07, 0.21) | | | -5.8 (-34.91, 36.43) | | 0.22 (0.13, 0.51) | | | -16.03 (-38.74, 23.37) | | | -0.54 (-0.6, -0.49) |
| Haiti | | | 53.33 (26.63, 86.85) | | -3.12 (-34.11, 51.98) | | 0.41 (0.21, 0.68) | | | -51.94 (-67.32, -24.61) | | 0.49 (0.28, 0.73) | | | -43.91 (-59.6, -19.93) | | | -1.9 (-2, -1.81) |
| Papua New Guinea | | | 20.46 (13.24, 35.65) | | 138.87 (76.99, 232.38) | | 0.20 (0.13, 0.34) | | | -6.31 (-30.58, 30.36) | | 0.27 (0.17, 0.55) | | | -10.69 (-33.1, 21.40) | | | -0.39 (-0.44, -0.34) |
| United Republic of Tanzania | | | 61.98 (31.43, 113.13) | | 31.96 (-8.14, 86.65) | | 0.11 (0.05, 0.19) | | | -41.66 (-59.39, -17.49) | | 0.16 (0.07, 0.31) | | | -37.72 (-56.81, -7.15) | | | -1.62 (-1.68, -1.57) |
| Democratic Republic of the Congo | | | 86.26 (36.21, 160.62) | | 48.17 (-21.48, 128.08) | | 0.10 (0.04, 0.18) | | | -37.21 (-66.73, -3.35) | | 0.19 (0.07, 0.39) | | | -16.83 (-39.67, 12.77) | | | -0.45 (-0.53, -0.37) |

⁎Parentheses for all GBD health estimate indicate 95% uncertainty intervals.

**Abbreviation:** ASR, age-standardized rates; EAPC, estimated annual percentage change; GBD, Global Burden of Diseases; PAH, pulmonary arterial hypertension; SDI, Socio-demographic Index.


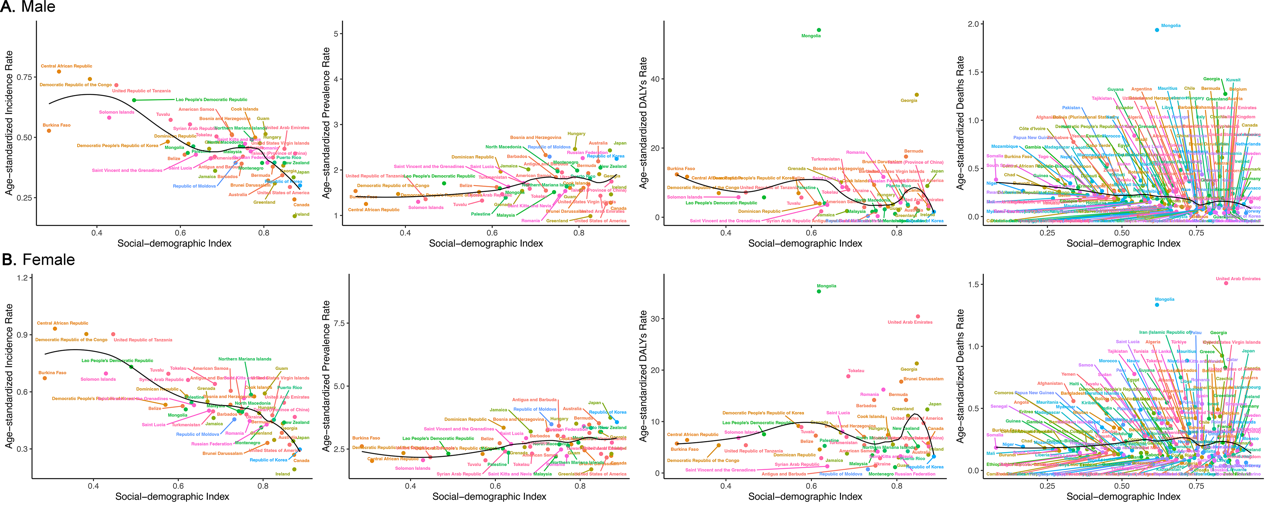


**Figure S1.** Relationship between SDI quintiles and the sex-specific ASR (per 100,000 persons) of the incidence, prevalence, DALYs and deaths for PAH during 1990-2021. Each coloured dot represents a country, with a solid black line depicting the nonlinear fitting trend. **A.** male; **B.** female.

**Abbreviation:** ASR, age-standardized rates; DALYs, disability-adjusted life years; PAH, pulmonary arterial hypertension; SDI, socio-demographic index.

**
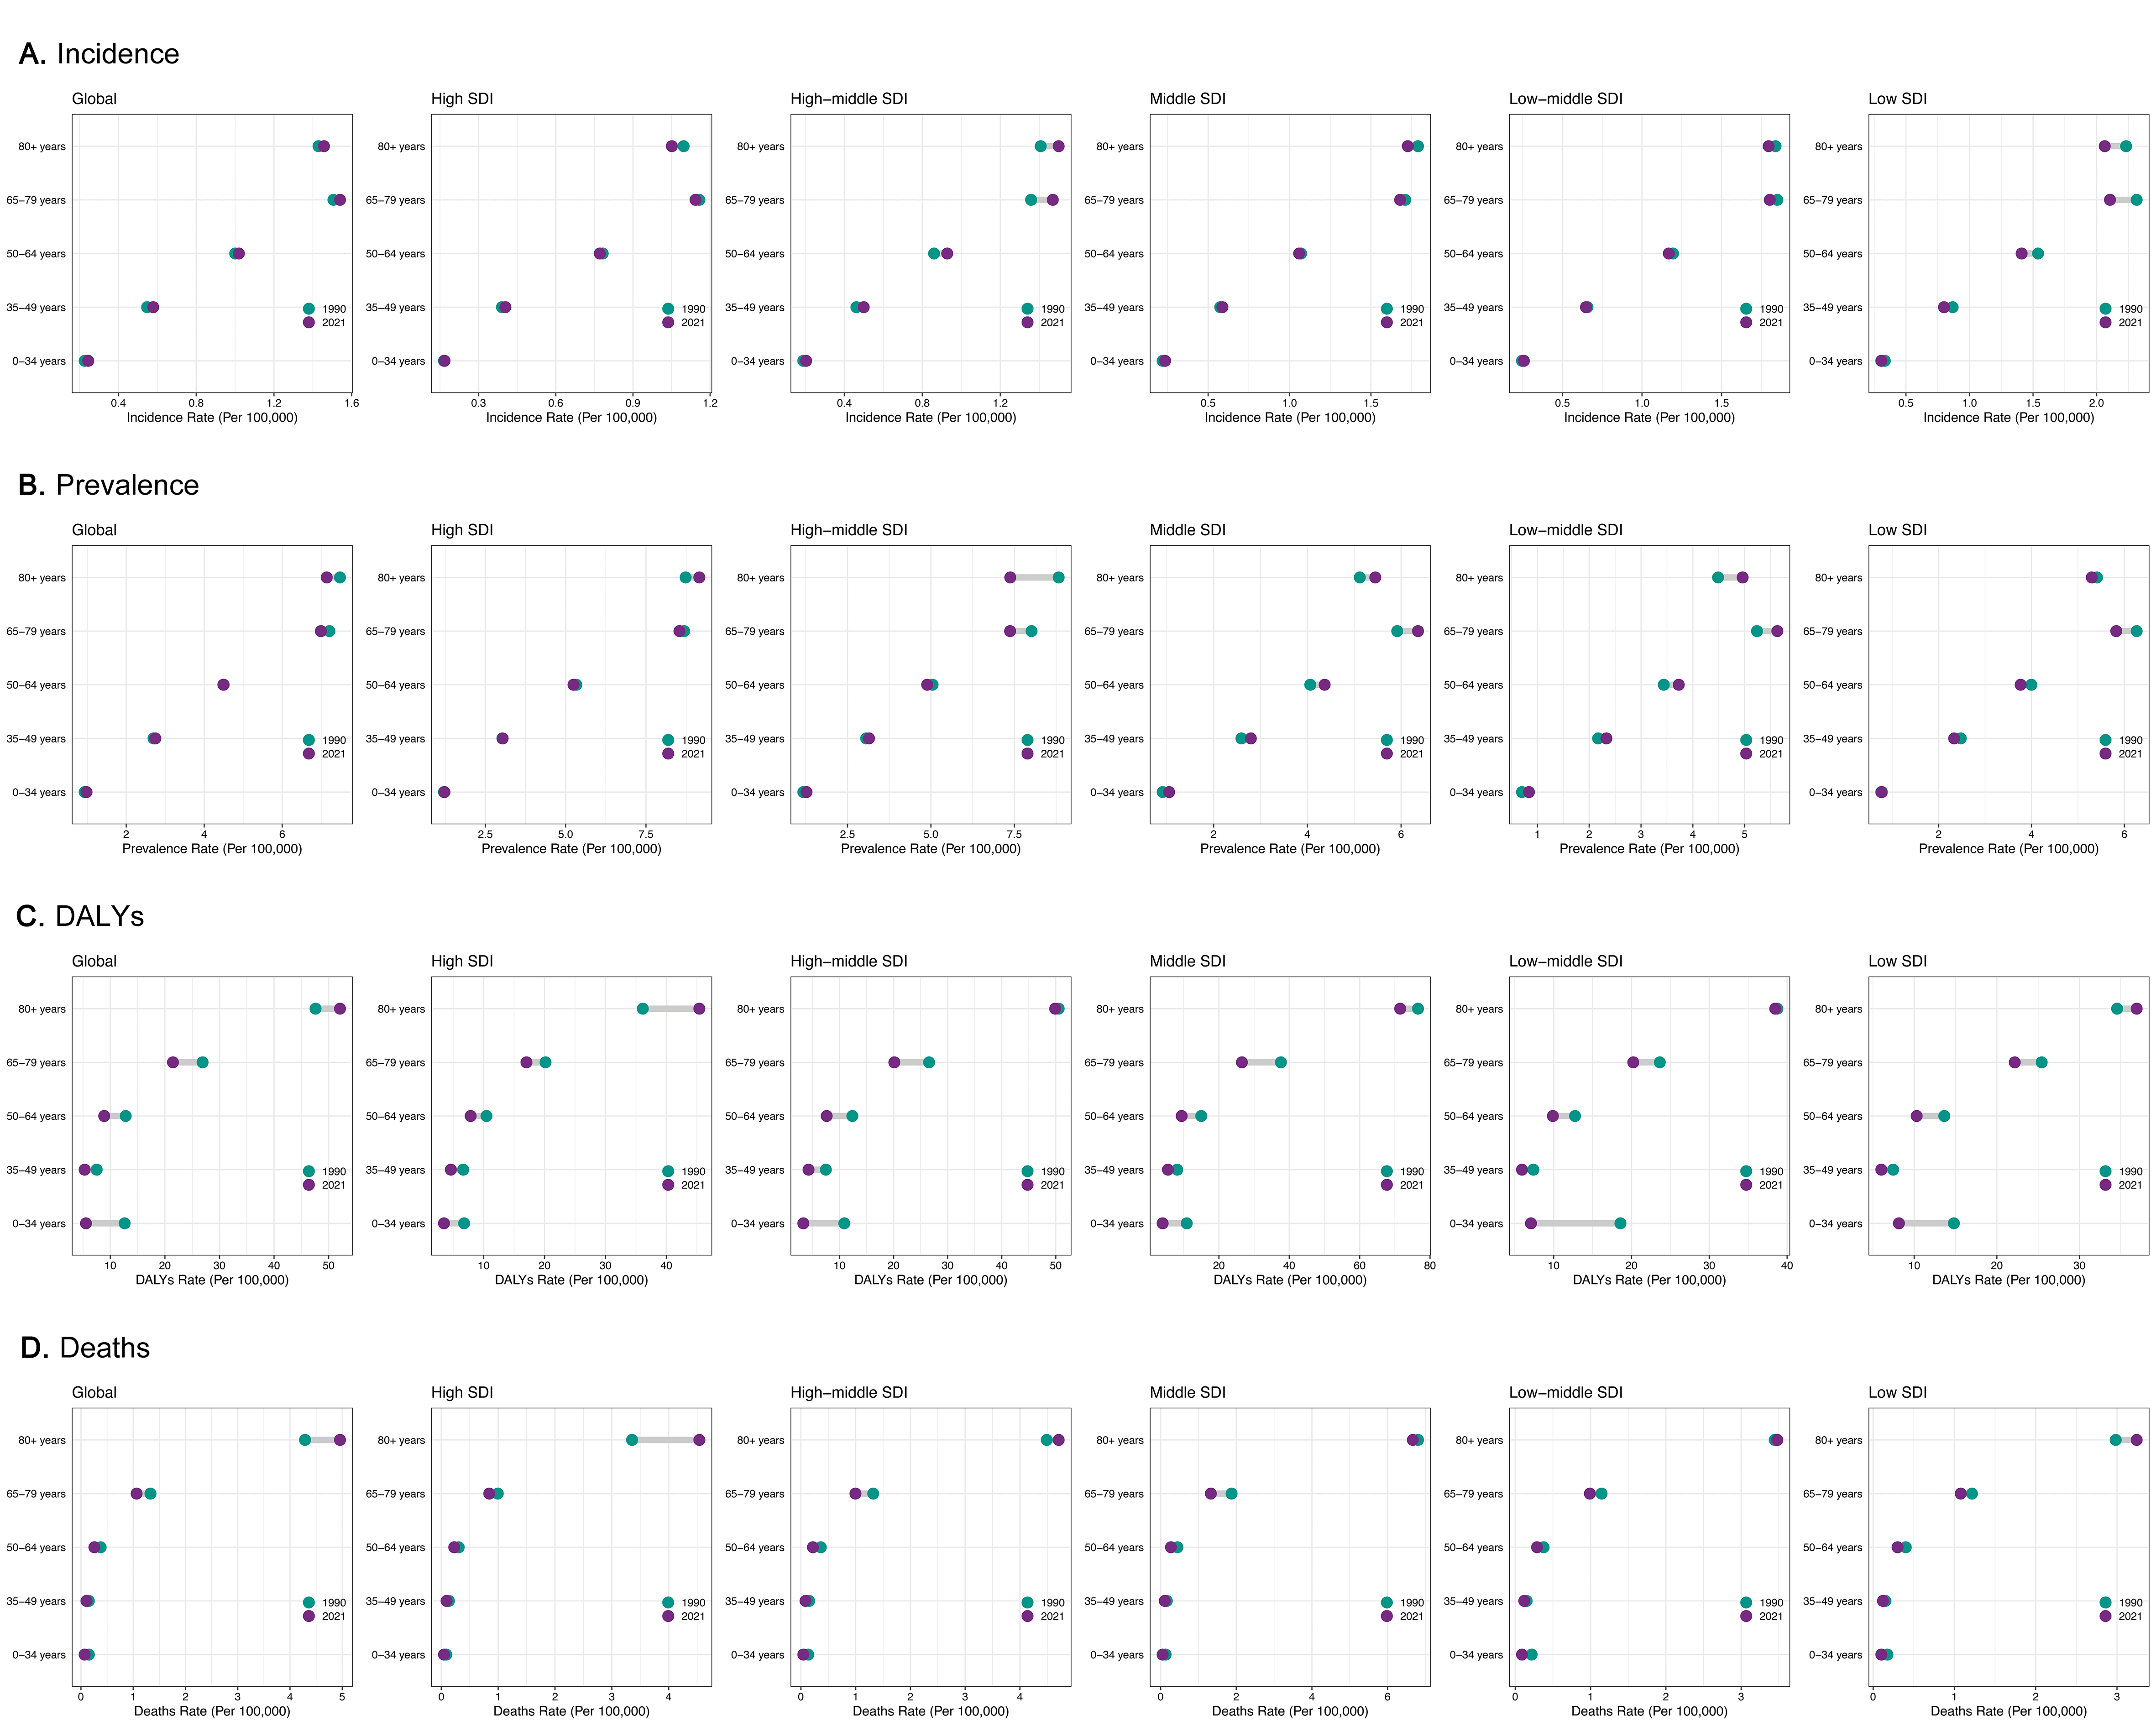
**

**Figure S2.** The temporal change of the both-sex incidence, prevalence, DALYs and deaths for PAH by SDI quintiles across different age groups in 204 countries and territories during 1990-2021. **A.** incidence; **B.** prevalence; **C.** DALYs; **D.** deaths.

**Abbreviation:** DALYs, disability-adjusted life years; PAH, pulmonary arterial hypertension.

**
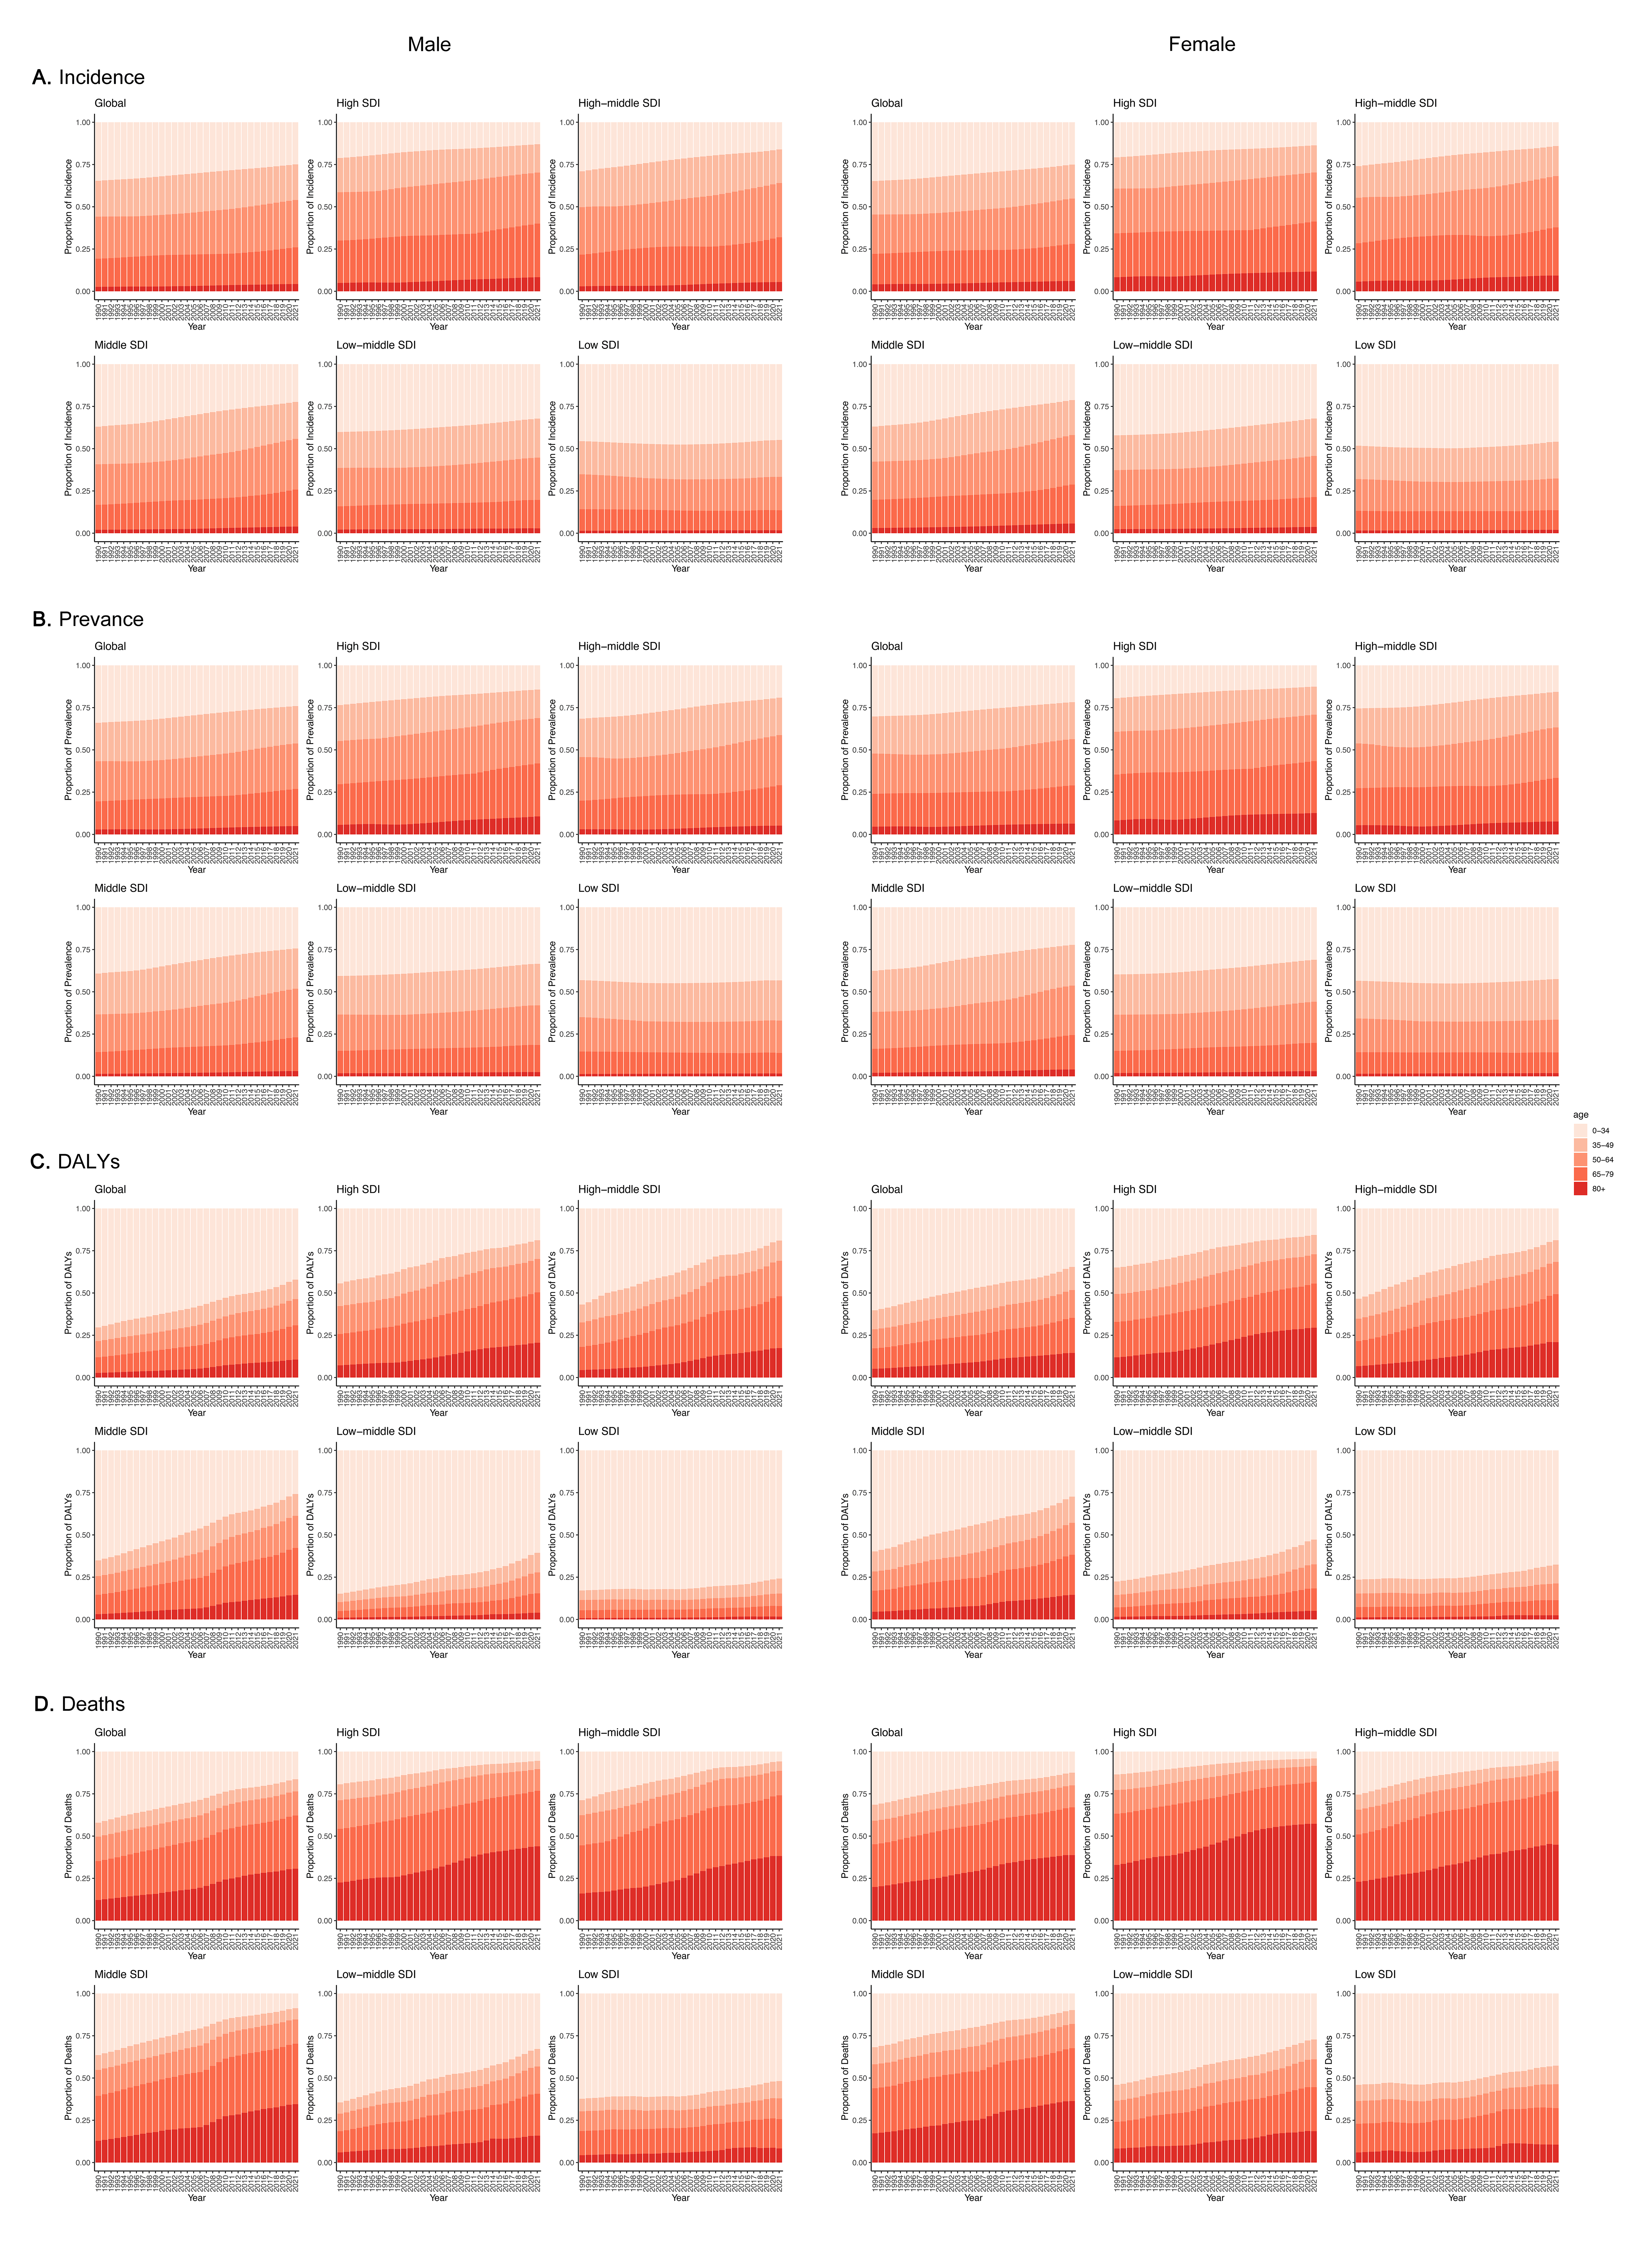
**

**Figure S3.** The temporal change in the relative proportion of sex-specific incidence, prevalence, DALYs and deaths for PAH by SDI quintiles across different age groups in 204 countries and territories during 1990-2021. **A.** incidence; **B.** prevalence; **C.** DALYs; **D.** deaths.

**Abbreviation:** DALYs, disability-adjusted life years; PAH, pulmonary arterial hypertension; SDI, socio-demographic index.


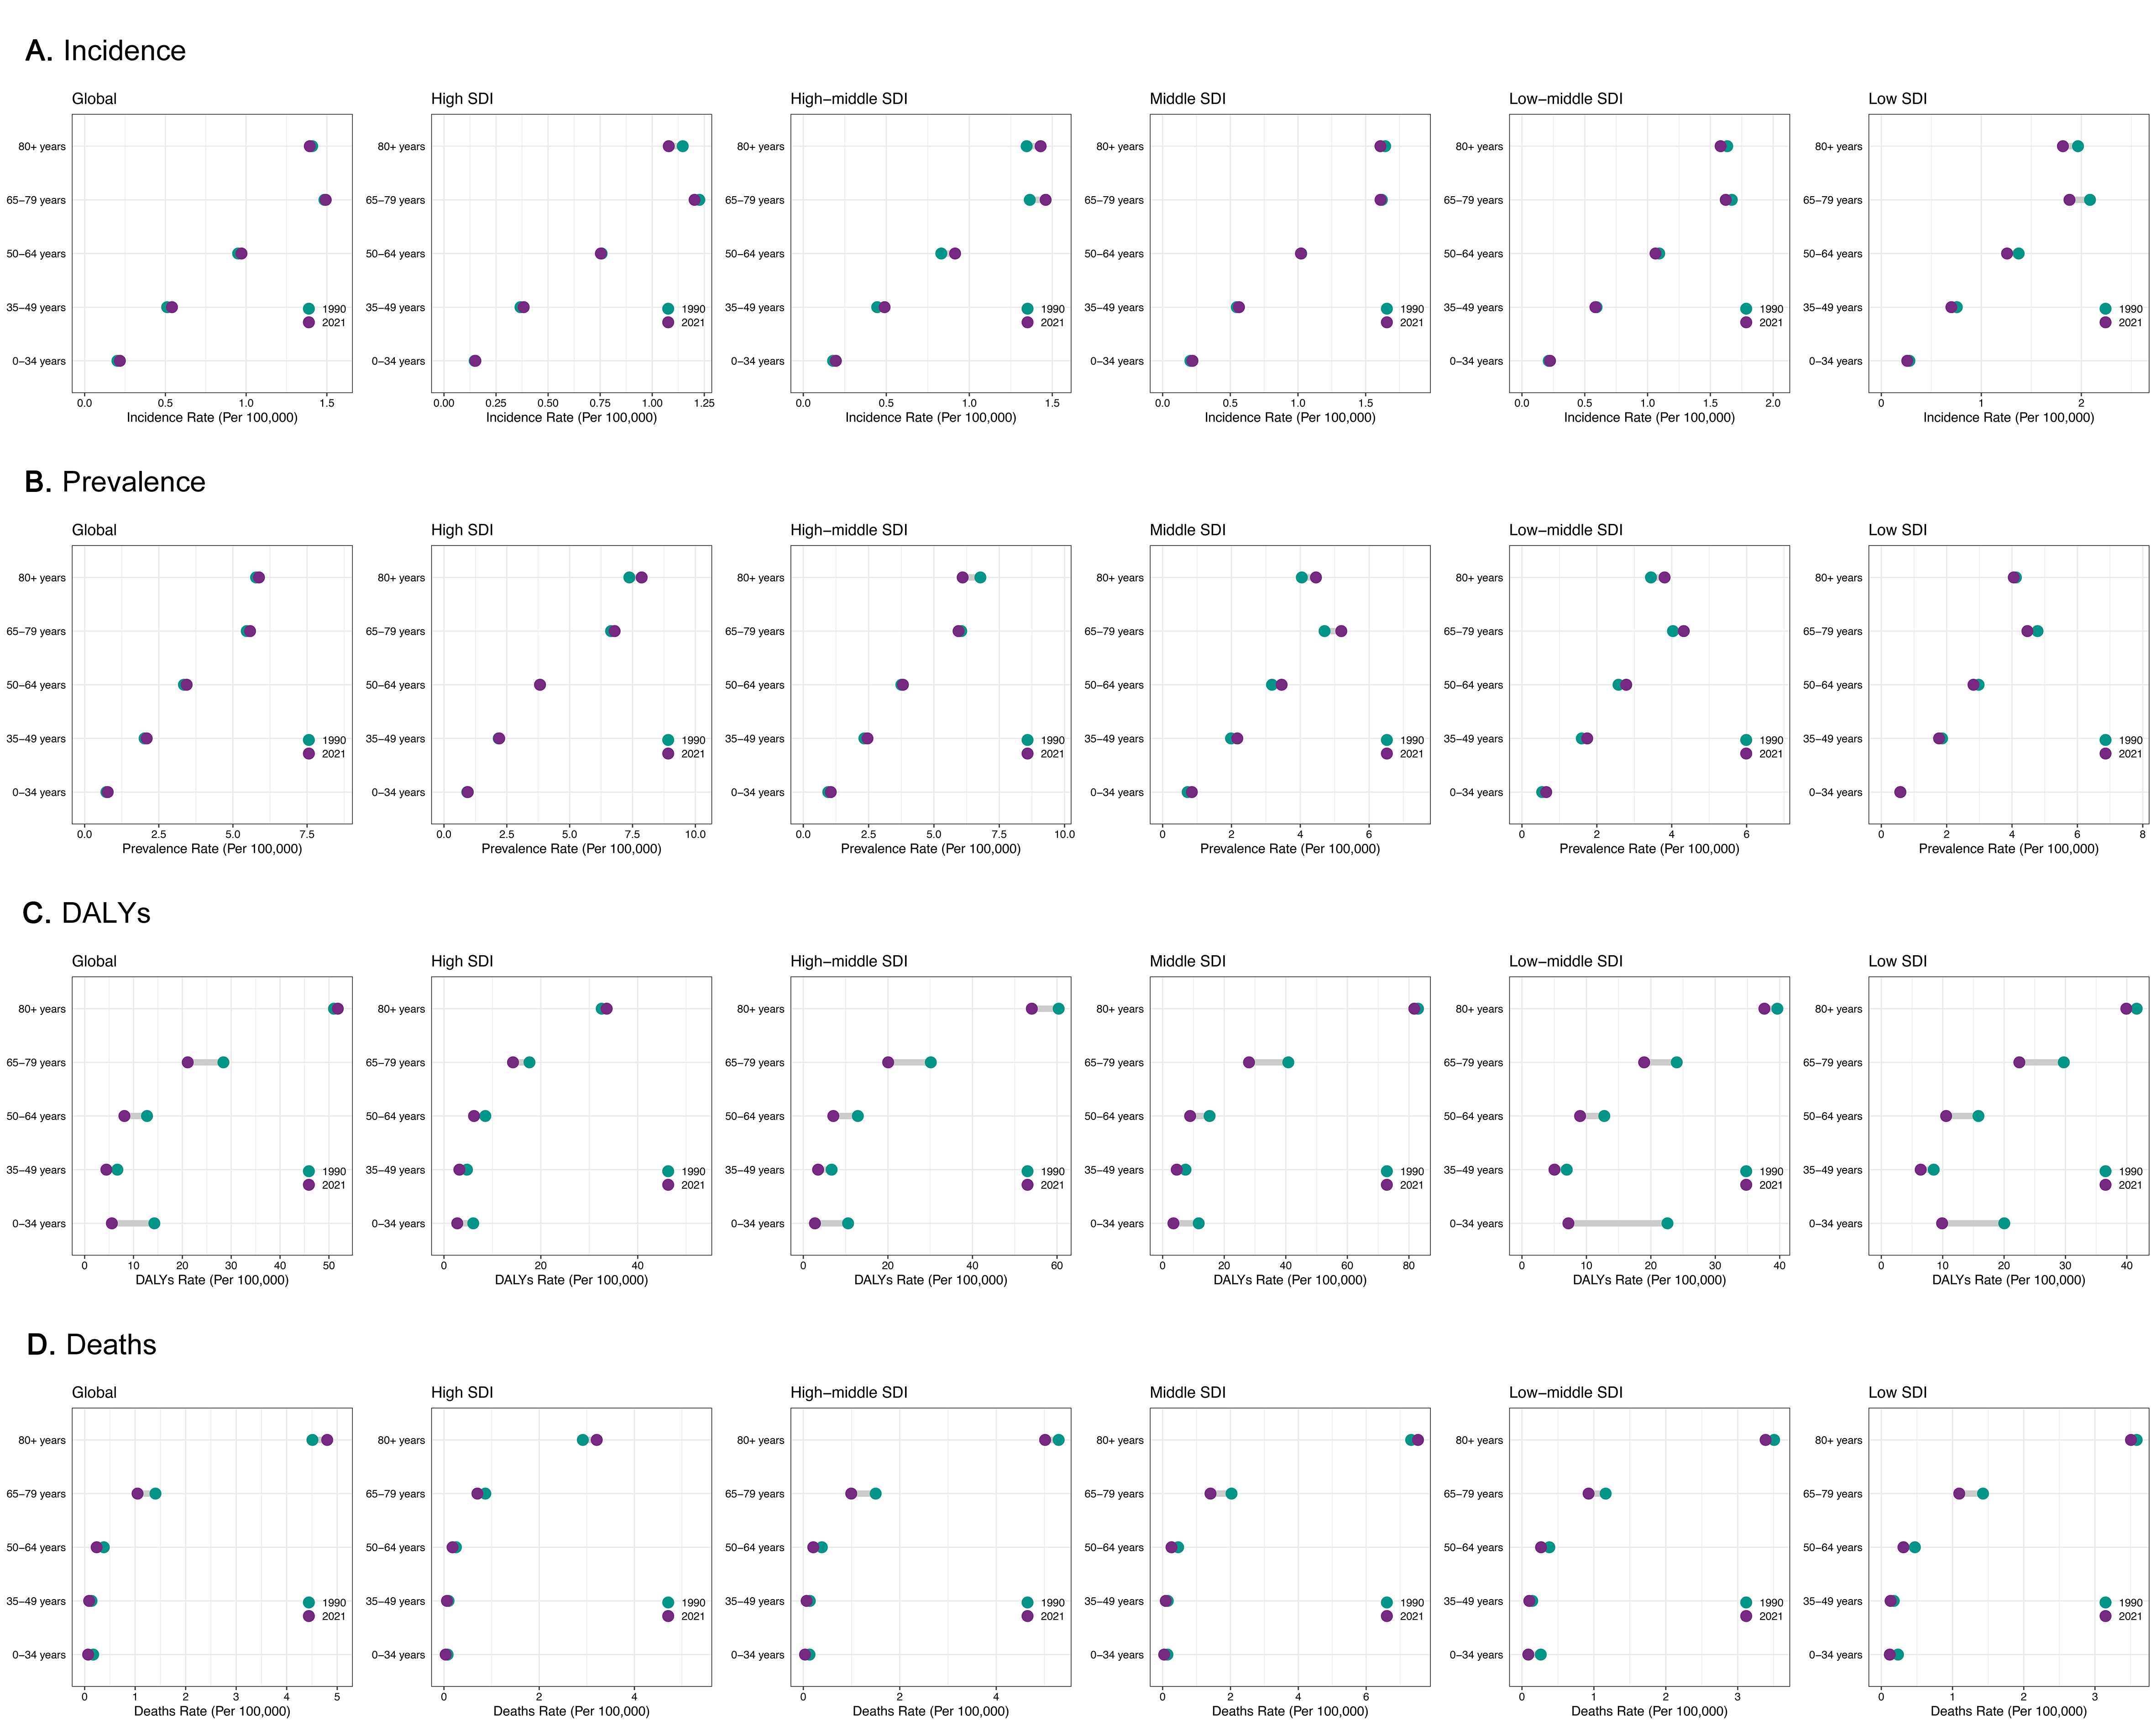


**Figure S4.** The temporal change of the male-sex incidence, prevalence, DALYs and deaths for PAH by SDI quintiles across different age groups in 204 countries and territories during 1990-2021. **A.** incidence; **B.** prevalence; **C.** DALYs; **D.** deaths.

**Abbreviation:** DALYs, disability-adjusted life years; PAH, pulmonary arterial hypertension.


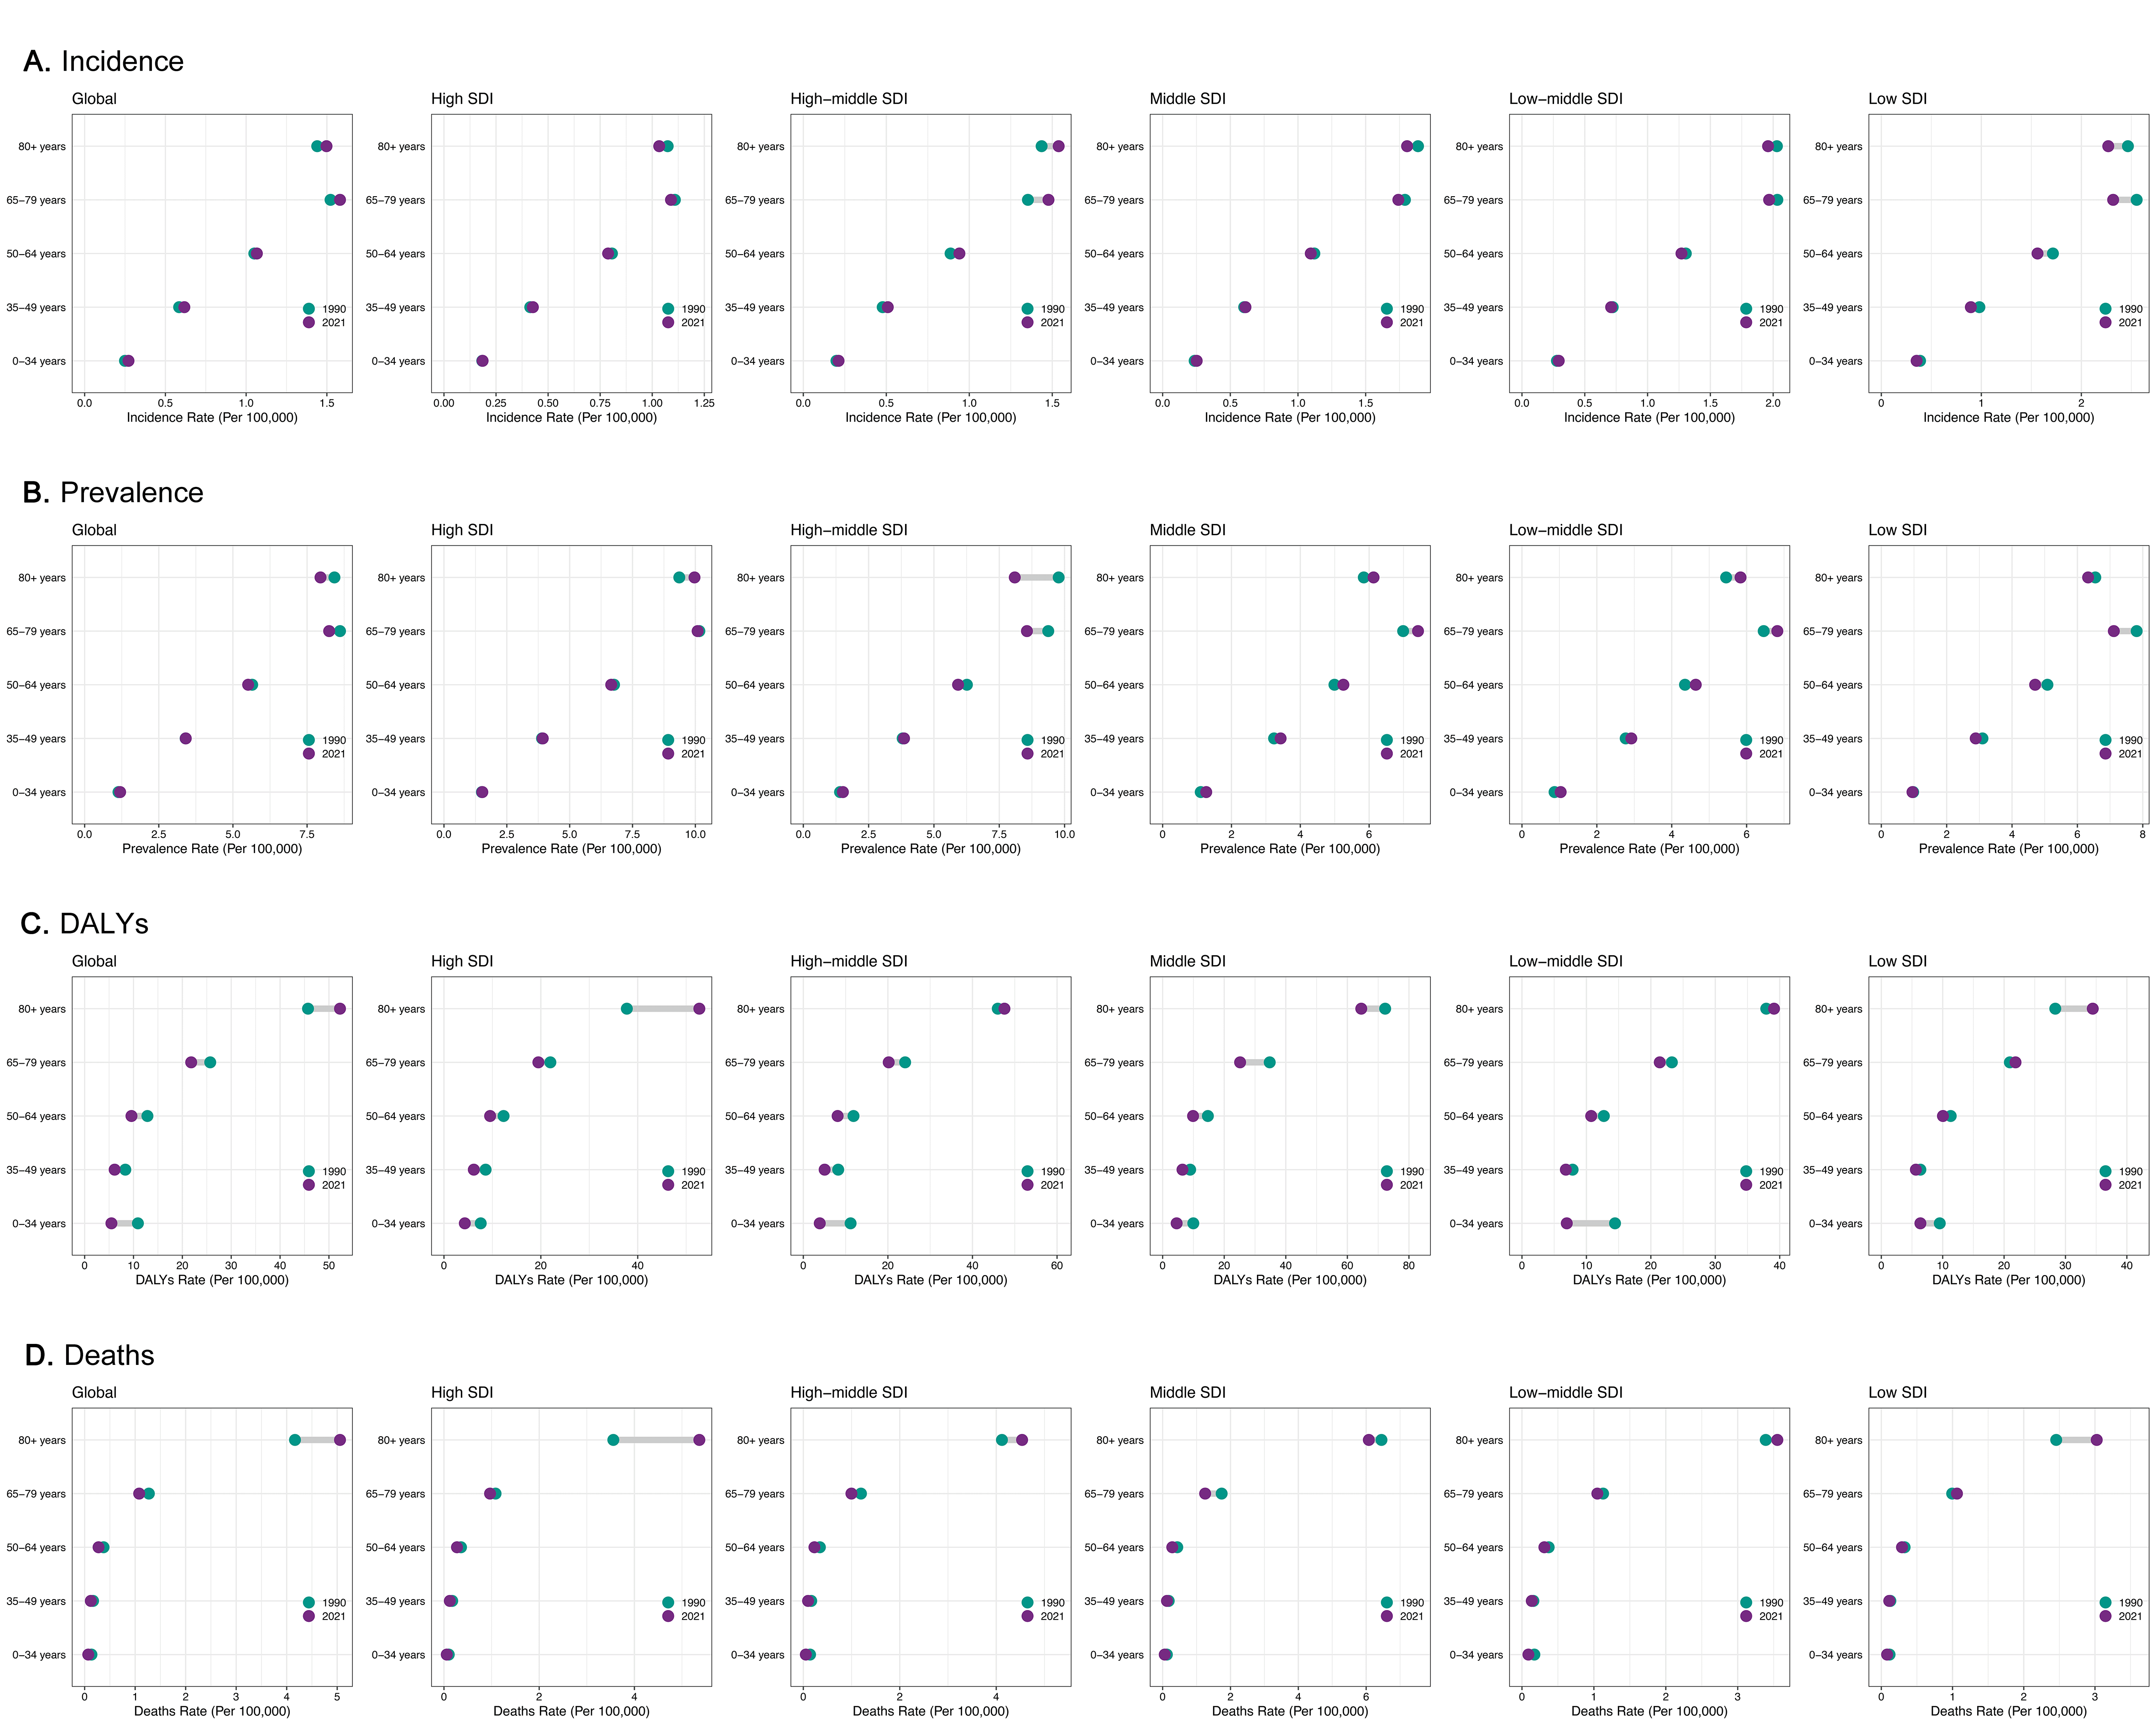


**Figure S5.** The temporal change of the female-sex incidence, prevalence, DALYs and deaths for PAH by SDI quintiles across different age groups in 204 countries and territories during 1990-2021. **A.** incidence; **B.** prevalence; **C.** DALYs; **D.** deaths.

**Abbreviation:** DALYs, disability-adjusted life years; PAH, pulmonary arterial hypertension.


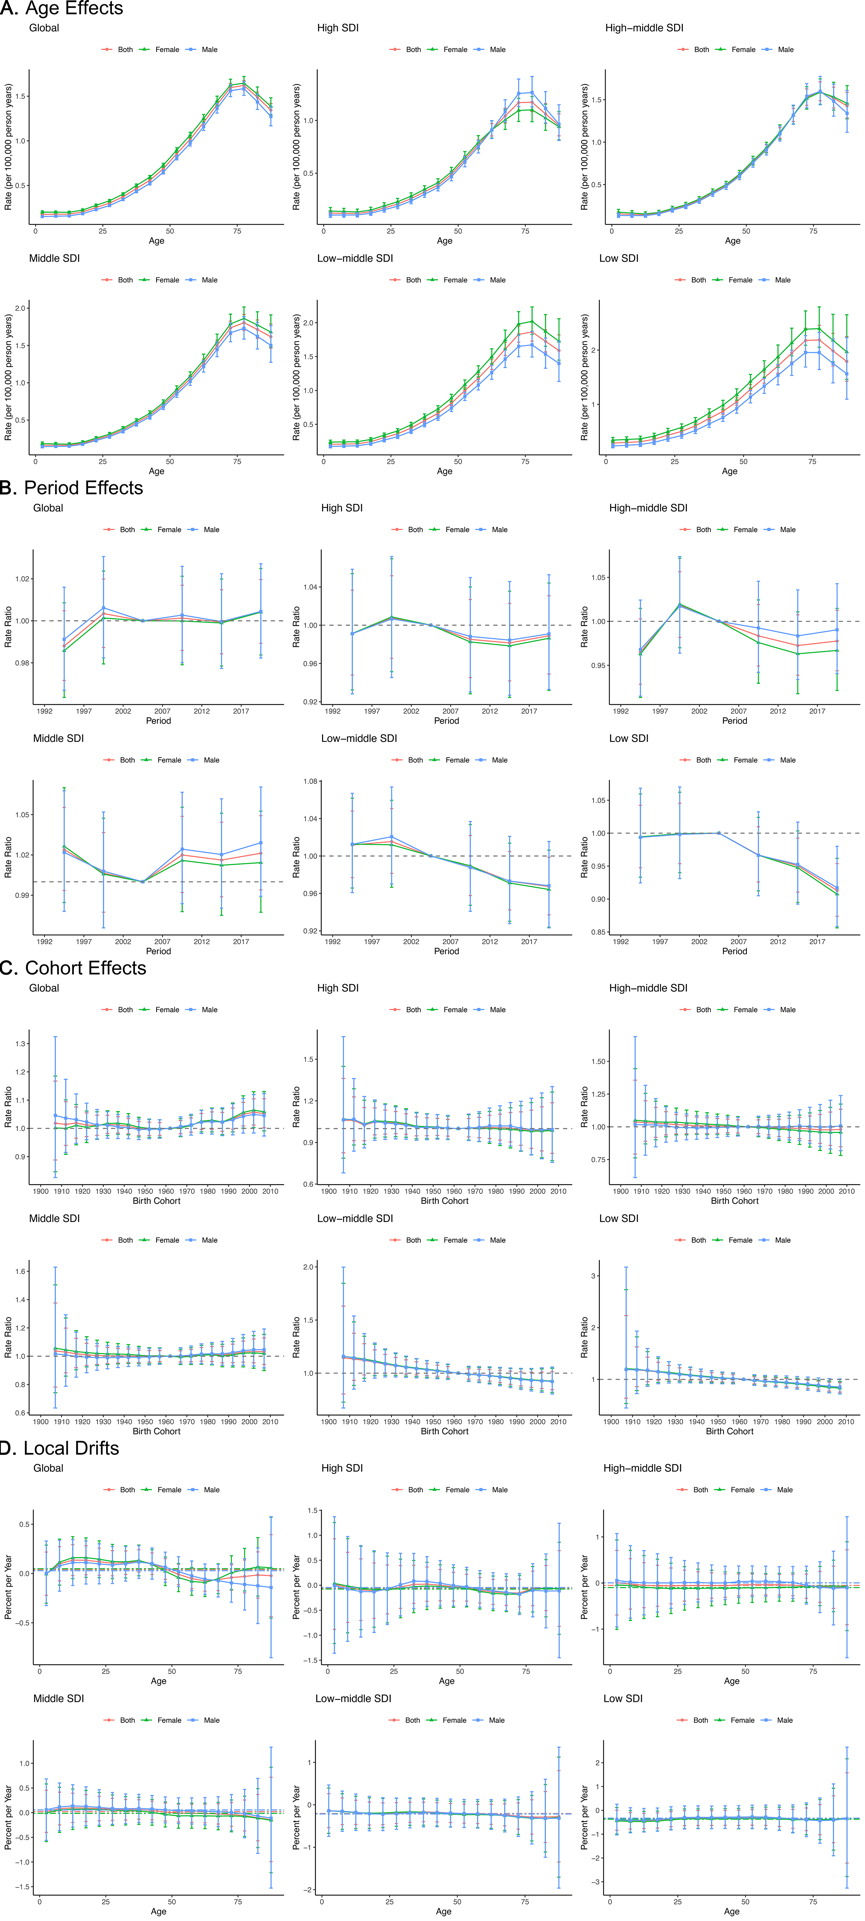


**Figure S6.** Age-period-cohort effects of incidence rate for PAH by SDI quintiles in 204 countries and territories during 1990-2021. **A.** age effects; **B.** period effects; **C.** cohort effects; **D.** local drifts.

**Abbreviation:** PAH, pulmonary arterial hypertension; SDI, Socio-demographic Index.


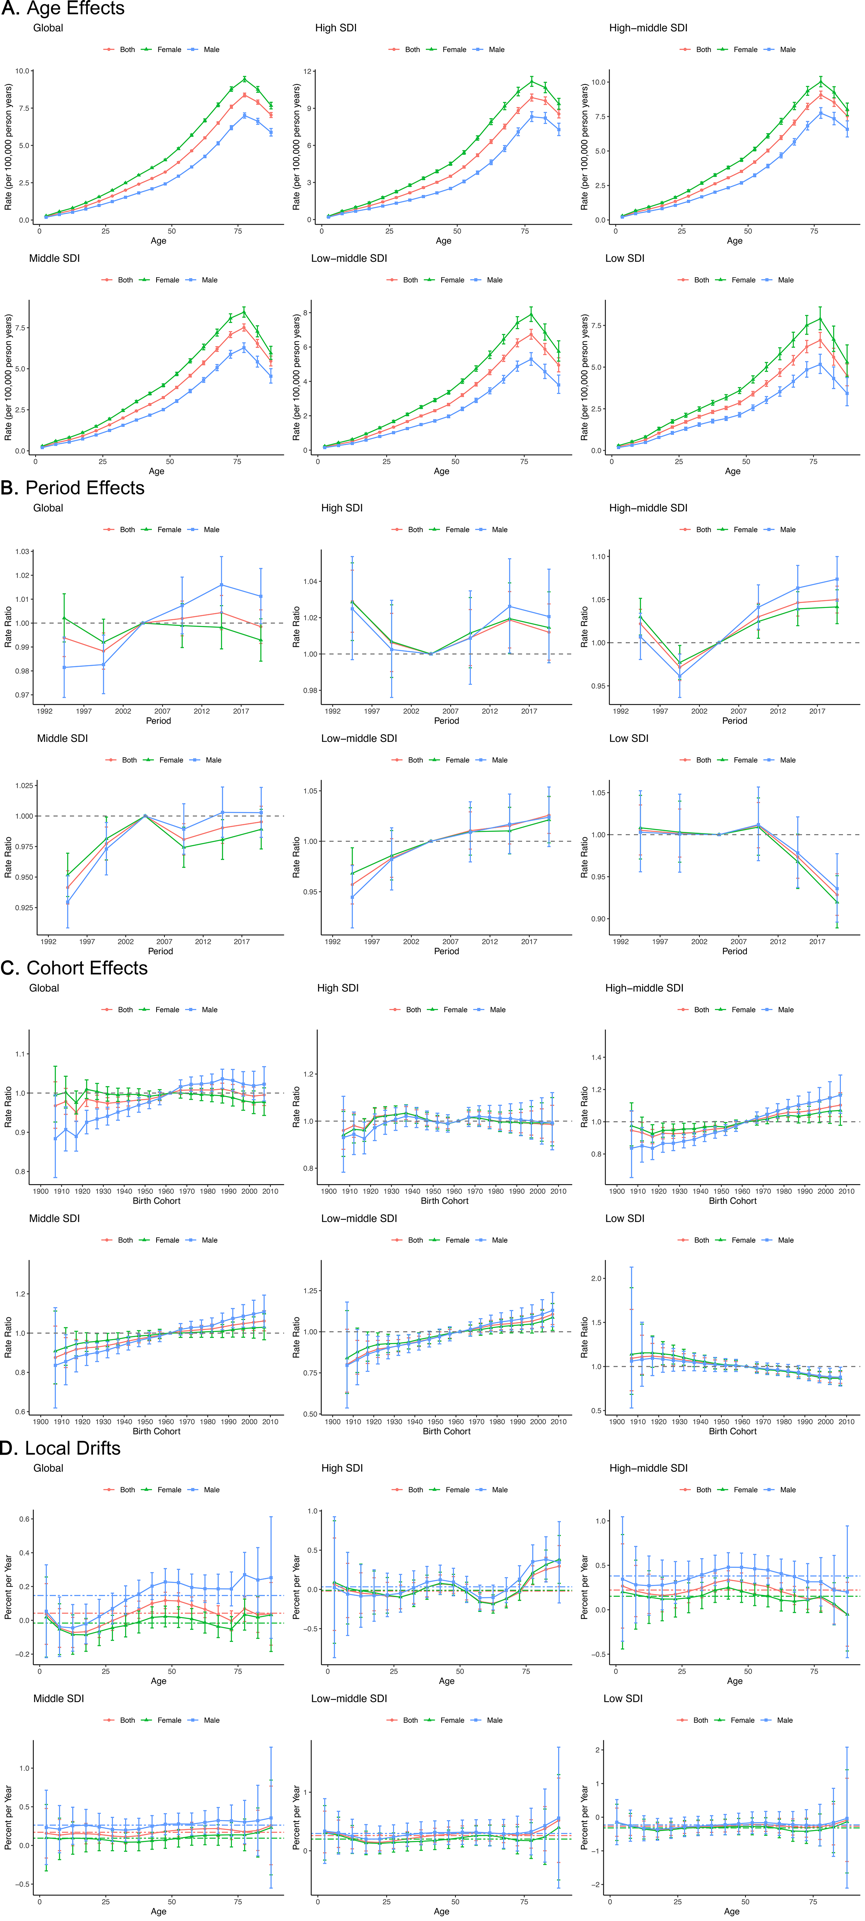


**Figure S7.** Age-period-cohort effects of prevalence rate for PAH by SDI quintiles in 204 countries and territories during 1990-2021. **A.** age effects; **B.** period effects; **C.** cohort effects; **D.** local drifts.

**Abbreviation:** PAH, pulmonary arterial hypertension; SDI, Socio-demographic Index.


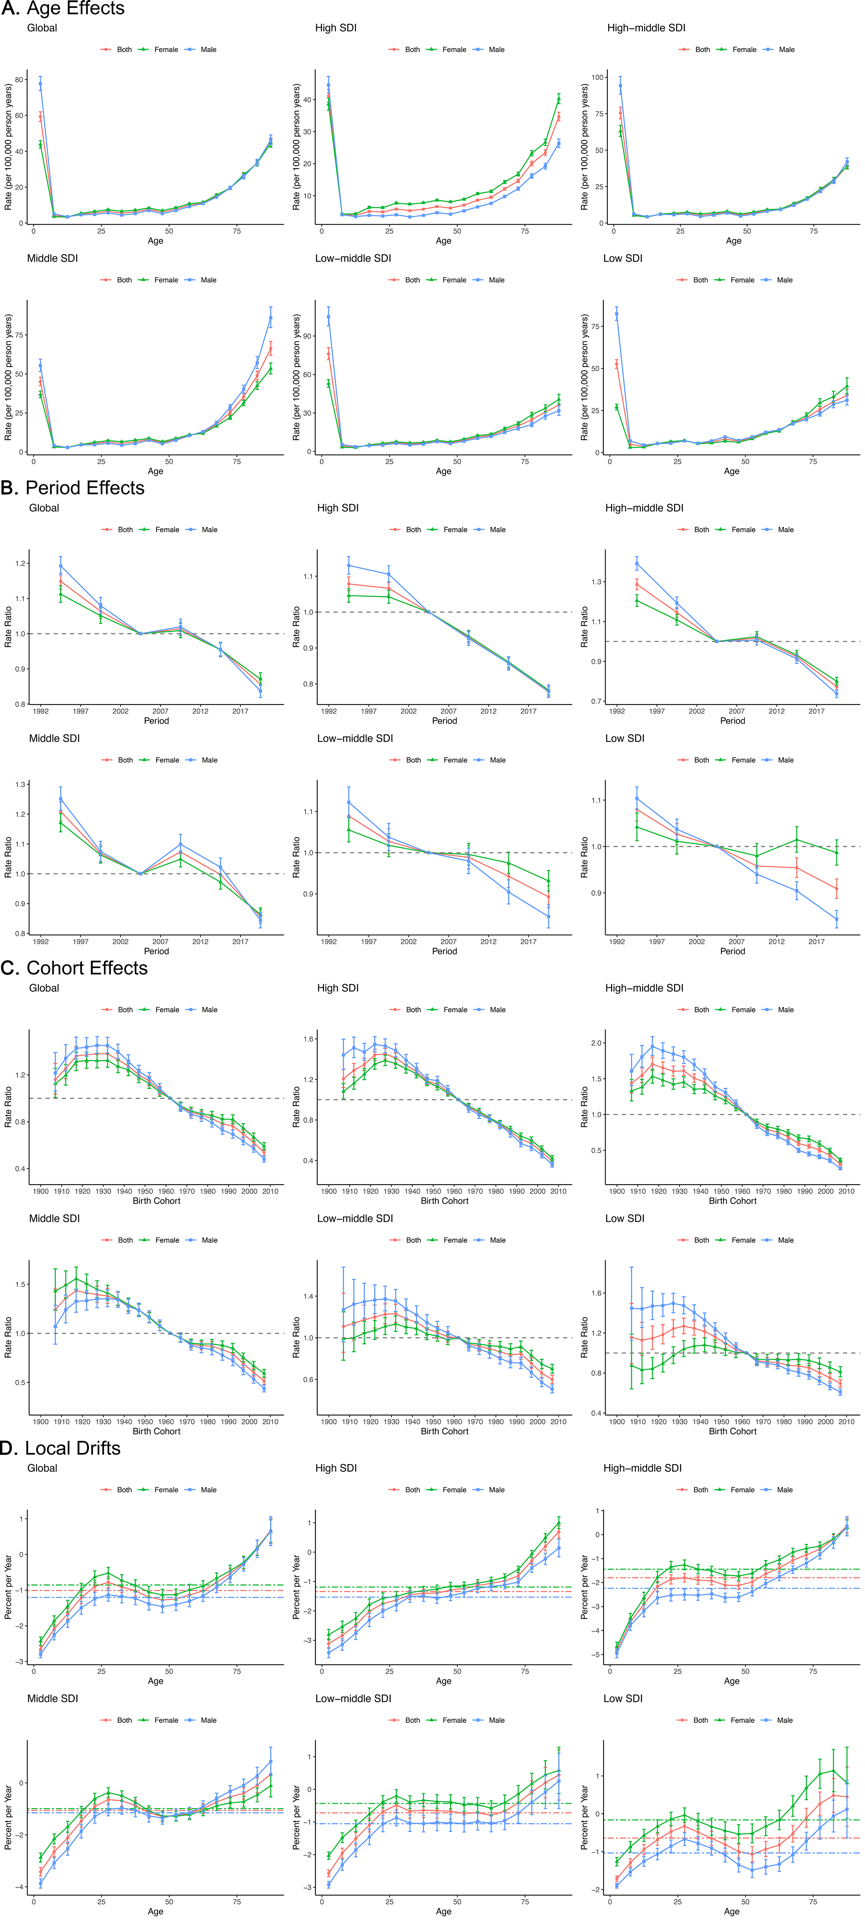


**Figure S8.** Age-period-cohort effects of DALYs rate for PAH by SDI quintiles in 204 countries and territories during 1990-2021. **A.** age effects; **B.** period effects; **C.** cohort effects; **D.** local drifts.

**Abbreviation:** PAH, pulmonary arterial hypertension; SDI, Socio-demographic Index.


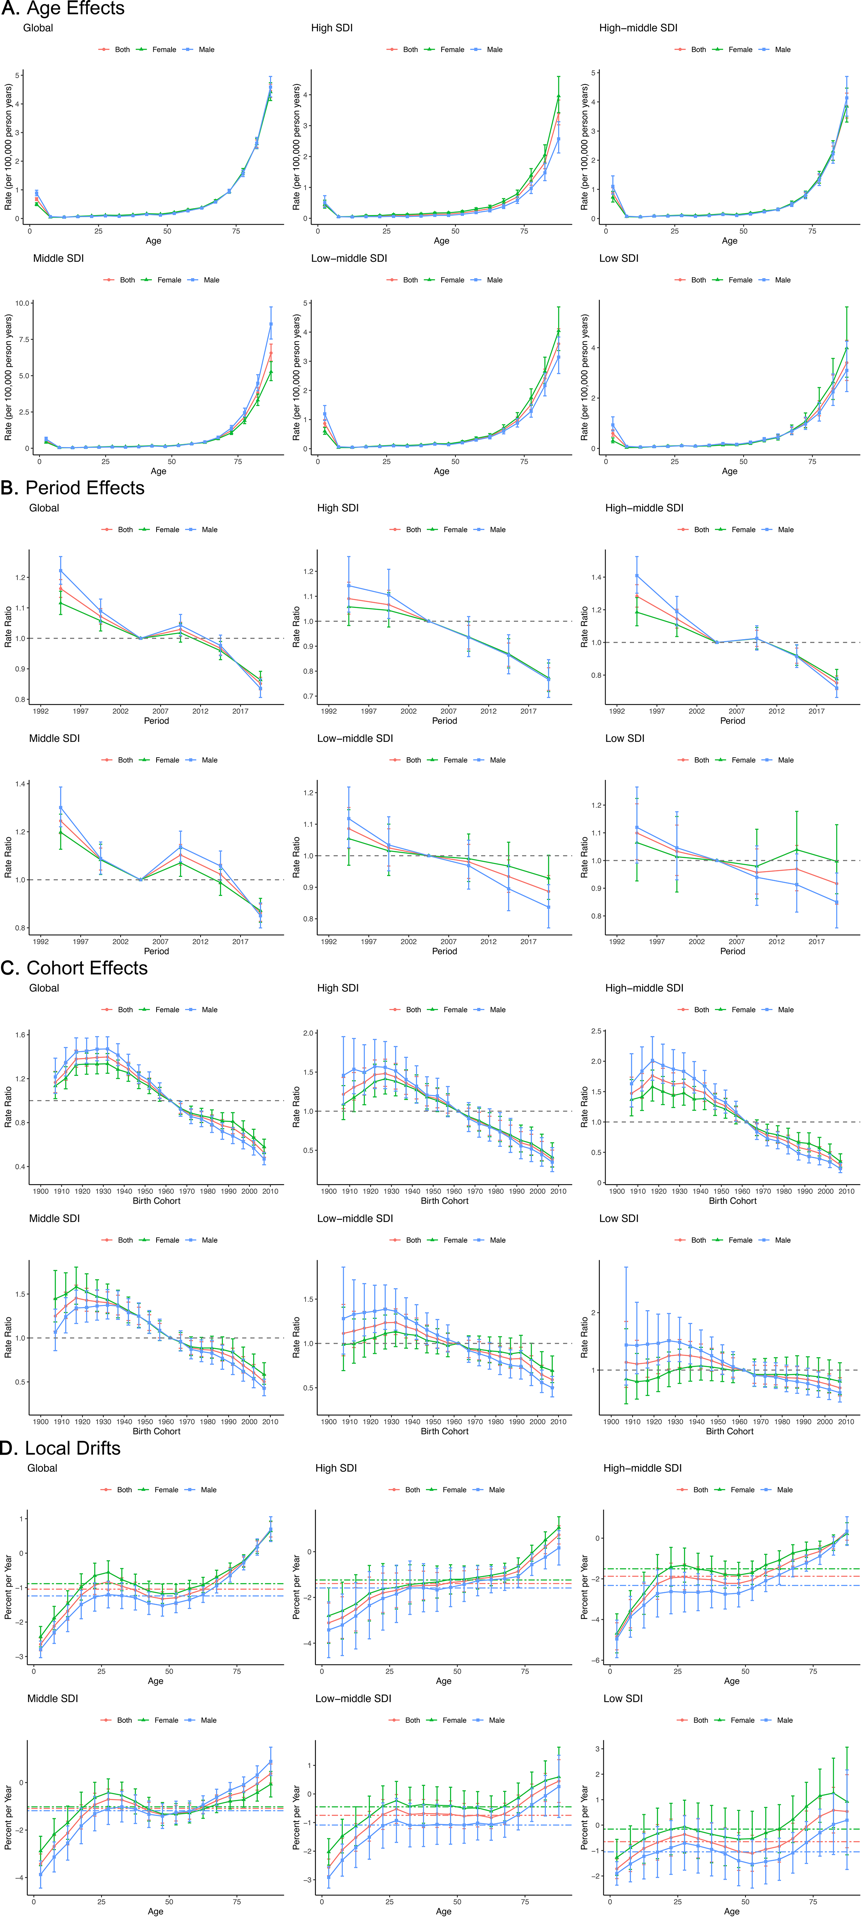


**Figure S9.** Age-period-cohort effects of death rate for PAH by SDI quintiles in 204 countries and territories during 1990-2021. **A.** age effects; **B.** period effects; **C.** cohort effects; **D.** local drifts.

**Abbreviation:** PAH, pulmonary arterial hypertension; SDI, Socio-demographic Index.





**Figure S10.** Sex-specific decomposition of factors contributing to incidence, prevalence, DALYs and deaths for PAH from 1990 to 2021. The contributions of epidemiological changes (purple), population growth (green), and aging (blue) are shown separately for males and females. The orange curves and dots illustrate the cumulative effects of these factors. **A.** Decomposition of changes for incidence, prevalence, DALYs and deaths for PAH in males. **B.** Decomposition of changes for incidence, prevalence, DALYs and deaths for PAH in females.

**Abbreviation:** DALY, disability-adjusted life-years; PAH, pulmonary arterial hypertension.
